1 **The AAA+ chaperone VCP disaggregates Tau fibrils and generates**  
2 **aggregate seeds**

3  
4 Itika Saha<sup>1,2</sup>, Patricia Yuste-Checa<sup>1,2</sup>, Miguel Da Silva Padilha<sup>3,4</sup>, Qiang Guo<sup>5,#</sup>, Roman Körner<sup>1</sup>,  
5 Hauke Holthausen<sup>1</sup>, Victoria A. Trinkaus<sup>1,5,6</sup>, Irina Dudanova<sup>3,4</sup>, Rubén Fernández-  
6 Busnadiego<sup>2,5,7,8</sup>, Wolfgang Baumeister<sup>5</sup>, David W. Sanders<sup>9,‡</sup>, Saurabh Gautam<sup>1,§</sup>, Marc I.  
7 Diamond<sup>9</sup>, F. Ulrich Hartl<sup>1,2,6,\*</sup> and Mark S. Hipp<sup>1,6,10,11\*</sup>

8 <sup>1</sup>Department of Cellular Biochemistry, Max Planck Institute of Biochemistry, Am Klopferspitz  
9 18, 82152 Martinsried, Germany.

10 <sup>2</sup>Aligning Science Across Parkinson's (ASAP) Collaborative Research Network, Chevy Chase,  
11 MD, USA.

12 <sup>3</sup>Molecular Neurodegeneration Group, Max Planck Institute of Neurobiology,  
13 82152 Martinsried, Germany.

14 <sup>4</sup>Department of Molecules – Signaling – Development, Max Planck Institute of Neurobiology,  
15 Am Klopferspitz 18, 82152 Martinsried, Germany.

16 <sup>5</sup>Department of Structural Molecular Biology, Max Planck Institute of Biochemistry, Am  
17 Klopferspitz 18, 82152 Martinsried, Germany.

18 <sup>6</sup>Munich Cluster for Systems Neurology (SyNergy), Munich, Germany.

19 <sup>7</sup>Institute of Neuropathology, University Medical Center Göttingen, 37099 Göttingen, Germany.

20 <sup>8</sup>Cluster of Excellence “Multiscale Bioimaging: from Molecular Machines to Networks of  
21 Excitable Cells” (MBExC), University of Göttingen, Germany.

22 <sup>9</sup>Center for Alzheimer's and Neurodegenerative Diseases, Peter O'Donnell Jr. Brain Institute,  
23 University of Texas Southwestern Medical Center, Dallas, 75390 Texas, USA.

24 <sup>10</sup>School of Medicine and Health Sciences, Carl von Ossietzky University Oldenburg,  
25 Oldenburg, Germany.

26 <sup>11</sup>Department of Biomedical Sciences of Cells and Systems, University Medical Center  
27 Groningen, University of Groningen, Antonius Deusinglaan, 1, 9713 AV Groningen, The  
28 Netherlands.

29 # Present address: State Key Laboratory of Protein and Plant Gene Research, School of Life  
30 Sciences and Peking-Tsinghua Center for Life Sciences, Peking University, Beijing 100871,  
31 China.

32 ‡ Present address: Department of Chemical and Biological Engineering, Princeton University,  
33 Princeton, NJ 08544, USA

34 § Present address: Boehringer Ingelheim International GmbH, 55216 Ingelheim, Germany and  
35 ViraTherapeutics GmbH, 6063 Rum, Austria.

36

37 \* To whom correspondence should be addressed:

38 [uhartl@biochem.mpg.de](mailto:uhartl@biochem.mpg.de) (FUH); [m.s.hipp@umcg.nl](mailto:m.s.hipp@umcg.nl) (MSH)

39

40

## 41 **Abstract**

42 Amyloid-like aggregates of the microtubule-associated protein Tau are associated with several  
43 neurodegenerative disorders including Alzheimer's disease. The existence of cellular machinery  
44 for the removal of such aggregates has remained unclear, as specialized disaggregase chaperones  
45 are thought to be absent in mammalian cells. Here we show in cell culture and in neurons that the  
46 AAA+ chaperone VCP is recruited to ubiquitylated Tau fibrils, resulting in their efficient  
47 disaggregation. Aggregate clearance depends on the functional cooperation of VCP with Hsp70  
48 and the ubiquitin-proteasome machinery. Inhibition of VCP activity stabilizes large Tau  
49 aggregates, and is accompanied by a reduction in the amount of Tau species competent of prion-  
50 like aggregate seeding in recipient cells. Thus, disaggregation by VCP generates seeding-active  
51 Tau as byproduct. These findings identify VCP as a core component of the machinery for the  
52 removal of neurodegenerative disease aggregates and suggest that its activity can be associated  
53 with enhanced aggregate spreading in tauopathies.

54

## 55 **Introduction**

56 Deposition of amyloid-like Tau aggregates is a hallmark of devastating neurodegenerative  
57 disorders such as Alzheimer's disease and frontotemporal dementia<sup>1</sup>. In healthy neurons, Tau  
58 functions in microtubule (MT) assembly and stabilization by associating with MTs via its repeat  
59 domain (RD) consisting of three or four 31-32 residue imperfect repeats. Two hexapeptide  
60 motifs within the RD are critical for Tau aggregation, and the RD forms the structural core of  
61 disease-associated aggregates<sup>1</sup>, with several RD mutations underlying familial tauopathies<sup>2</sup>.  
62 Expression of human Tau mutants in mouse models recapitulates essential features of

63 tauopathies including the formation of amyloid-like Tau deposits and neuronal loss<sup>3,4</sup>, indicating  
64 that Tau aggregation is central to neurodegeneration. Pathogenic Tau aggregates often exhibit the  
65 ability to induce aggregation in naïve cells through a mechanism of transcellular propagation that  
66 allows aggregate pathology to spread across brain regions<sup>5,6</sup>. Notably, pathological Tau  
67 aggregates and spreading are resolved upon lowering Tau levels, which is accompanied by  
68 improved neuronal health and extended lifespan<sup>7,8</sup>. However, the cellular mechanisms involved  
69 in the reversal, clearance and spread of Tau aggregates remain poorly understood.

70         While specialized chaperones of the AAA+ family in bacteria, yeast and plants have the  
71 ability to resolve amyloid-like aggregates<sup>9,10</sup>, direct homologues of these hexameric  
72 disaggregases have not been identified in mammalian cells. Instead, disaggregation in higher  
73 eukaryotes is mainly attributed to the Hsp70 chaperone machinery<sup>11-14</sup>. The human Hsp70-  
74 Hsp40-Hsp110 chaperone system efficiently dissociates Tau and  $\alpha$ -synuclein fibrils in vitro<sup>15-17</sup>  
75 independent of AAA+ disaggregases that cooperate with the Hsp70 system in yeast and bacteria  
76 to achieve disaggregation<sup>9</sup>. The eukaryotic AAA+ ATPase valosin-containing protein (VCP)  
77 exerts ATP-dependent protein unfolding activity<sup>18,19</sup> and has been proposed to resolve protein  
78 aggregates<sup>20,21</sup> and certain condensates such as stress granules<sup>22,23</sup>. VCP facilitates protein  
79 turnover via the ubiquitin-proteasome system<sup>24,25</sup>, in addition to sustaining functional  
80 autophagy<sup>26</sup>. Indeed, VCP mutations have been associated with aggregate deposition disorders  
81 such as vacuolar tauopathy and inclusion body myopathy associated with Paget disease of bone  
82 and frontotemporal dementia (IBMPFD)<sup>20,27-29</sup>. Accumulation of Tau aggregates in vacuolar  
83 tauopathy was proposed to be a consequence of diminished ATPase activity of mutant VCP  
84 (D395G)<sup>20</sup>. IBMPFD-associated VCP mutants exhibit increased basal ATP hydrolysis and  
85 unfolding activity<sup>30,31</sup>, altered interactions with cofactors<sup>32,33</sup> and perturbed autophagic

86 function<sup>34</sup>. Whether any of these mutations influence the clearance of pre-formed fibrillar Tau  
87 aggregates in cells is not known.

88 Here we provide direct evidence in a cell culture model and in primary murine neurons  
89 that VCP disaggregates amyloid-like Tau fibrils in a ubiquitin and proteasome-dependent  
90 manner, with the Hsp70 chaperone system contributing to aggregate clearance. This function of  
91 VCP is not detectably perturbed by pathogenic VCP mutations. Although disaggregation by VCP  
92 is coupled to proteasomal degradation, intermediates of the disaggregation process escape  
93 proteolysis and are a source of seeding-competent Tau species.

94

## 95 **Results**

96 To investigate the ability of cells to clear Tau aggregates, we used HEK293 cells stably  
97 expressing TauRD-Y (P301L/V337M), a mutant of the amyloid-forming repeat domain of  
98 Tau<sup>35,36</sup> fused to YFP via a flexible linker<sup>37</sup> (Fig. 1a). TauRD-Y is soluble and diffusely  
99 distributed in TauRD-Y cells, but the extracellular addition of Tau aggregates isolated from  
100 tauopathy brain tissue or generated in vitro induces its aggregation via template-based seeding,  
101 leading to formation of aggregates that are stably propagated for weeks<sup>37,38</sup> (Fig. 1b). Using  
102 TauRD-Y aggregate seeds<sup>37</sup>, we generated a cell line (TauRD-Y\*) in which phosphorylated  
103 TauRD-Y accumulated in cytosolic inclusions 0.5-5  $\mu\text{m}^2$  in size that stained with the amyloid-  
104 specific dye Amylo-Glo<sup>39</sup> (Fig. 1c, Supplementary Fig. 1a-c). Analysis of the inclusions in intact  
105 TauRD-Y\* cells by cryo-electron tomography revealed TauRD-Y fibrils of ~18 nm diameter,  
106 which were distinguishable from cytoskeletal structures (Fig. 1d) and consistent with the  
107 structures of fibrillar Tau in tauopathy patient brain<sup>40-44</sup>. Thus, TauRD forms amyloid-like

108 fibrillar aggregates in TauRD-Y\* cells. TauRD-Y aggregates were also able to induce aggregates  
109 of full-length Tau fused to YFP (FLTau-Y). These aggregates reacted with the AT-8 antibody  
110 specific for phosphorylation at serine 202 and threonine 205 (epitopes not present in TauRD)  
111 (Fig. 1a, Supplementary Fig. 1d,e), which has been used previously to detect paired helical  
112 filaments<sup>45,46</sup>.

113

### 114 **Proteasomal clearance of Tau aggregates**

115 Soluble TauRD-Y was efficiently degraded in TauRD-Y cells upon inhibition of protein  
116 synthesis with cycloheximide (CHX) (Supplementary Fig. 1f). CHX treatment also led to partial  
117 clearance of TauRD inclusions in TauRD-Y\* cells (Fig. 1e, Supplementary Fig. 1f,g). To avoid  
118 global inhibition of protein synthesis, we employed cells in which the expression of TauRD-Y is  
119 controlled with a Tet-regulated promoter (Tet-TauRD-Y and Tet-TauRD-Y\* cells)<sup>37</sup>  
120 (Supplementary Fig. 2a). Addition of doxycycline resulted in clearance of TauRD-Y inclusions  
121 and insoluble TauRD-Y protein ( $t_{1/2} \sim 12$  h) (Supplementary Fig. 2a-d). The amount of insoluble  
122 TauRD-Y decreased faster than the level of soluble TauRD-Y (Supplementary Fig. 2d),  
123 consistent with aggregate material being solubilized prior to degradation. Moreover, inhibition of  
124 TauRD-Y synthesis resulted in a time dependent reduction of inclusion size and number per cell  
125 (Fig. 1f). Thus, the cells are able to efficiently dissociate and degrade amyloid-like TauRD-Y  
126 aggregates.

127         Addition of the selective proteasome inhibitor Epoxomicin or siRNA-mediated  
128 downregulation of the proteasome component PSMD11 stabilized aggregated TauRD-Y upon  
129 doxycycline shut-off and prevented aggregate clearance (Supplementary Fig. 3a-e). Proteasome  
130 inhibition also stabilized soluble TauRD-Y in Tet-TauRD-Y cells<sup>47</sup> (Supplementary Fig. 3a), but

131 did not lead to de novo Tau aggregation<sup>48</sup> (Supplementary Fig. 4h). Hence, the persistence of  
132 TauRD-Y aggregates upon proteasome inhibition is due to stabilization of pre-existing  
133 aggregates. In contrast, inhibition of lysosomal degradation with Bafilomycin A1 (confirmed by  
134 increased levels of LC3-II) or of autophagy with 3-methyladenine was without effect on the  
135 levels of total or aggregated TauRD-Y protein in the cellular model used (Supplementary Fig.  
136 3a-c). Downregulation of autophagy components ATG5/7 supported this conclusion  
137 (Supplementary Fig. 3d,e). Thus, TauRD-Y aggregates are degraded in a proteasome-dependent,  
138 autophagy-independent manner.

139

#### 140 **Tau disaggregation requires VCP**

141 Proteins must generally be unfolded to access the catalytic center of the 20S proteasome. Thus,  
142 prior to degradation, aggregated proteins need to undergo disaggregation<sup>49</sup>. To identify the  
143 cellular machinery involved in TauRD-Y disaggregation, we performed an interactome analysis  
144 of aggregated TauRD-Y by quantitative mass spectrometry. We identified the AAA+ ATPase  
145 VCP as one of the most highly enriched interactors of aggregated TauRD-Y, along with the  
146 ubiquitin-binding VCP cofactors UFD1L, NPLOC4 and NSFL1C, and multiple subunits of the  
147 26S proteasome (Fig. 2a, Supplementary Table 1). Hsp70 was detected in the proteomic analysis  
148 but was not enriched on aggregated TauRD-Y. Co-localization of VCP and its cofactors with  
149 TauRD-Y aggregates was confirmed by fluorescence microscopy (Fig. 2b, Supplementary Fig.  
150 4a-c).

151 VCP utilizes the energy from ATP hydrolysis to structurally remodel and unfold proteins  
152 in different cellular contexts<sup>18,50</sup>. To assess whether VCP is involved in TauRD-Y  
153 disaggregation, we inhibited VCP in cells using NMS-873, a small molecule allosteric inhibitor

154 of the VCP ATPase<sup>51</sup>. Similar to proteasome inhibition, NMS-873 blocked the clearance of  
155 TauRD-Y aggregates when TauRD-Y synthesis was stopped with doxycycline (Fig. 2c,d).  
156 Likewise, the aggregates were stabilized when VCP was inhibited using CB-5083  
157 (Supplementary Fig. 4d), a competitive inhibitor of ATP binding in the D2 ATPase domain of  
158 VCP<sup>52</sup>, or down-regulated with siRNA (Supplementary Fig. 4e,f). VCP inhibition during  
159 ongoing TauRD-Y synthesis resulted in a significant increase in inclusion size (Supplementary  
160 Fig. 4g), suggesting that the inclusions exist at a dynamic equilibrium between formation and  
161 disaggregation. No aggregation of soluble TauRD-Y was detected after treating cells with NMS-  
162 873 or VCP siRNA (Supplementary Fig. 4 h,i). VCP down-regulation caused a marginal increase  
163 in the level of soluble TauRD-Y in Tet-TauRD-Y cells, but did not result in a significant  
164 stabilization after doxycycline addition (Supplementary Fig. 4j). In contrast, aggregate-  
165 containing Tet-TauRD-Y\* cells treated with VCP siRNA accumulated significantly higher  
166 amounts of TauRD-Y both in the absence or presence of doxycycline, indicating an aggregate-  
167 specific role of VCP (Supplementary Fig. 4j).

168         Importantly, VCP also co-localized with aggregates of full-length Tau (FLTau-Y) in  
169 FLTau-Y\* cells (Supplementary Fig. 4k), and VCP or proteasome inhibition prevented the  
170 clearance of FLTau-Y aggregates (Supplementary Fig. 4l,m), recapitulating the behavior of  
171 TauRD. To exclude a possible role of the YFP tag on Tau in VCP-mediated disaggregation, we  
172 generated HEK293T cells stably expressing non-tagged full-length Tau (FLTau) and myc-tagged  
173 Tau repeat domain (TauRD) under a Tet-regulated promoter (Tet-FLTau, Tet-FLTau\* and Tet-  
174 TauRD, Tet-TauRD\* cells). Similar to FLTau-Y aggregates in FLTau-Y\* cells, FLTau  
175 aggregates in Tet-FLTau\* cells were phosphorylated at serine 202 and threonine 205 and  
176 colocalized with VCP (Fig. 2e, Supplementary Fig. 4n). FLTau and TauRD aggregates were



177 resolved in a VCP and proteasome-dependent manner when Tau synthesis was halted by adding  
178 doxycycline (Fig. 2f, Supplementary Fig. 4o).

179         We next tested whether VCP also modulates Tau aggregation in neurons. Mouse primary  
180 neurons were transduced to express soluble TauRD-Y (Fig. 3a,b). Upon seeding with TauRD  
181 aggregates<sup>37</sup>, we observed the formation of multiple inclusions of intracellular TauRD-Y  
182 (Fig. 3b). Cryo-electron tomography of TauRD-Y inclusions in aggregate-containing neurons  
183 revealed fibrillar aggregates similar to the aggregates in TauRD-Y\* cells (Fig. 3c). The lower  
184 cytosolic density of neurons allowed the observation that the TauRD-Y fibrils were coated with  
185 globular domains consistent with the presence of YFP on TauRD (Supplementary Fig. 4p), as  
186 previously observed for other amyloidogenic proteins fused to fluorescent protein<sup>53,54</sup>. Aggregate  
187 seeding in neurons was accompanied by a ~40% decrease in cell viability (Fig. 3d). Most of the  
188 neuronal TauRD-Y inclusions stained positive for VCP (Fig. 3b). Treatment with the VCP  
189 inhibitor NMS-873 for 4 h caused a massive accumulation of TauRD aggregates in seeded  
190 neurons, in some cases occupying most of the cell body area (Fig. 3e). No inclusions were  
191 observed in unseeded cells upon VCP inhibition (Fig. 3e). These results demonstrate that VCP  
192 functions in TauRD-Y disaggregation in neurons.

193

#### 194 **Disaggregation depends on substrate ubiquitylation**

195 Ubiquitylation of VCP substrates, particularly the formation of lysine 48 (K48) linked  
196 polyubiquitin chains, is required for VCP recruitment<sup>18,19,30,50</sup>. We therefore analyzed  
197 immunoprecipitates of TauRD-Y for the presence of ubiquitin. Only in TauRD-Y\* cells  
198 containing aggregated TauRD-Y was the protein detectably modified by the addition of 1 to 4  
199 ubiquitin molecules (Fig. 4a). Analysis with a K48-specific antibody verified the presence of

200 K48-linked ubiquitin (Fig. 4a). Immunofluorescence imaging also showed that the TauRD-Y  
201 aggregates stained positive for K48-linked ubiquitin chains (Fig. 4b, Supplementary Fig. 5a),  
202 while K63-linked ubiquitin was not detectable (Supplementary Fig. 5a). Likewise, the TauRD-Y  
203 inclusions in primary neurons colocalized with poly-ubiquitin chains (Supplementary Fig. 5b).  
204 K48-linked ubiquitin signal was also observed on the aggregates of untagged FLTau and TauRD  
205 (Supplementary Fig. 5c).

206 Inhibition of the ubiquitin-activating enzyme E1 with the specific inhibitor MLN7243<sup>55</sup>  
207 efficiently blocked ubiquitin conjugation (Supplementary Fig. 6a). TauRD-Y inclusions were  
208 still present but were no longer ubiquitin K48-reactive (Fig. 4b, Supplementary Fig. 6b). VCP  
209 was not recruited to these aggregates (Fig. 4c, Supplementary Fig. 6c), and both disaggregation  
210 and degradation of TauRD-Y in Tet-TauRD-Y\* cells were blocked (Fig. 4d, Supplementary Fig.  
211 6d). MLN7243 treatment also prevented the degradation of soluble TauRD-Y to a degree similar  
212 to proteasome inhibition (Supplementary Fig. 6e). Together these data show that VCP  
213 recruitment requires ubiquitylation of aggregated Tau, followed by disaggregation and  
214 remodeling to species that are accessible for proteasomal degradation.

215

## 216 **Functions of VCP and Hsp70 in disaggregation**

217 Disaggregation of both heat stress-induced and amyloid-like aggregates in mammalian cells has  
218 been assigned to the Hsp70 chaperone system<sup>11-13,16</sup>. Our findings raised the possibility of a  
219 functional cooperation between VCP and Hsp70 in these processes. To determine whether VCP  
220 participates in dissolving heat-induced aggregates, we expressed the metastable protein firefly  
221 luciferase (Fluc) fused to GFP in HEK293 cells. Heat stress at 43 °C for 2 h combined with  
222 proteasome inhibition resulted in the formation of large (~2-3 μm) Fluc-GFP inclusions<sup>56</sup>

223 (Supplementary Fig. 7a). Unlike the TauRD-Y inclusions, the Fluc-GFP aggregates did not stain  
224 with an amyloid-specific dye (Supplementary Fig. 7a), suggesting that they were amorphous in  
225 structure. The Fluc-GFP aggregates were ubiquitin-negative and did not co-localize with VCP  
226 (Supplementary Fig. 7b-c). Accordingly, VCP inhibition with NMS-873 did not interfere with  
227 disaggregation (Supplementary Fig. 7d), arguing against a role of VCP in this process. However,  
228 inhibition of the ATPase activity of Hsp70 with the inhibitor VER-155008<sup>57</sup> prevented Fluc-GFP  
229 disaggregation (Supplementary Fig. 7d), confirming the role of the Hsp70 system in  
230 disaggregation.

231 To investigate whether Hsp70 participates in TauRD-Y disaggregation, we treated Tet-  
232 TauRD-Y\* cells with VER-155008 or with NMS-873 and stopped TauRD-Y synthesis with  
233 doxycycline. VCP inhibition stabilized both large ( $>1.5 \mu\text{m}^2$ ) and small ( $<1.5 \mu\text{m}^2$ ) TauRD-Y  
234 inclusions (Supplementary Fig. 8a-b). In contrast, Hsp70 inhibition stabilized large aggregates  
235 only partially and resulted in a marked accumulation of small inclusions, consistent with VCP  
236 acting before Hsp70 in the disaggregation process (Supplementary Fig. 8a-b). These findings  
237 suggested that Hsp70 cooperates with VCP in disaggregation, either by dissociating fragments  
238 generated by VCP and/or by preventing re-aggregation of TauRD liberated from inclusions by  
239 VCP. Since Hsp70 was not enriched on TauRD-Y aggregates in the proteomic analysis  
240 (Supplementary Table 1), its interaction with TauRD may be transient.

241

## 242 **Effects of VCP mutants on Tau disaggregation**

243 Point mutations in VCP are associated with dominantly inherited disorders such as Inclusion  
244 body myopathy with Paget disease of bone and frontotemporal dementia (IBMPFD)<sup>26</sup> and  
245 vacuolar tauopathy<sup>20</sup>. These mutations lead to a dominant negative loss or alteration of VCP

246 function, presumably due to the oligomeric nature of VCP<sup>58,59</sup>. The mutation D395G (DG),  
247 associated with vacuolar tauopathy is located in the D1 ATPase domain of VCP (Fig. 5a). It has  
248 been reported to have a mildly reduced capacity to disaggregate Tau fibrils in an in vitro system,  
249 due to a ~30% reduced ATPase activity<sup>20</sup>. The IBMPFD mutations, A232E (AE) and R155H  
250 (RH), are located in the D1 ATPase domain and in the N-domain, respectively, and are  
251 associated with enhanced ATPase activity compared to wild type (WT) VCP<sup>31</sup> (Fig. 5a). We  
252 tested whether these mutations impair Tau disaggregation in our cellular model using the  
253 ATPase defective VCP double-mutant E305Q/E578Q (EQ/EQ)<sup>60</sup> (Fig. 5a) as a control. The  
254 mutant proteins, carrying a C-terminal myc-tag, were transiently overexpressed in Tet-TauRD-  
255 Y\* cells for 24 h and then TauRD-Y synthesis was stopped with doxycycline to observe  
256 disaggregation. Note that mutant VCP was expressed in cells containing pre-formed aggregates  
257 to exclude a potential role of VCP in aggregate seeding<sup>61</sup>. The myc-tagged mutant proteins were  
258 present in hexamers that migrated on native PAGE like WT VCP (Supplementary Fig. 9a) and  
259 colocalized with TauRD-Y aggregates (Fig. 5b).

260 As expected, expression of the ATPase defective VCP (EQ/EQ) effectively prevented  
261 TauRD-Y aggregate clearance, even though the expression levels of this mutant were relatively  
262 low when compared with the other constructs (Fig. 5c,d). Moreover, the TauRD-Y aggregates  
263 increased in size upon VCP (EQ/EQ) expression as observed previously for inhibition of VCP  
264 activity by NMS-873 (Supplementary Fig. 4g), presumably reflecting a shift of soluble TauRD to  
265 the aggregates (Supplementary Fig. 2a). However, none of the disease-related VCP mutants,  
266 including the vacuolar tauopathy mutant DG, when expressed at the indicated levels, detectably  
267 stabilized TauRD-Y aggregates (Fig. 5b-d). Similar results were obtained when the presence of  
268 aggregates was specifically analyzed in cells expressing the mutant VCP proteins by

269 immunofluorescence (Supplementary Fig. 9b). In conclusion, the effect of the VCP disease  
270 mutations on disaggregation, if any, is only mild, suggesting that inhibition of aggregate  
271 clearance may not be the primary mechanism by which these mutations cause disease.

272

### 273 **VCP generates Tau species capable of seeding aggregation**

274 Progression of tauopathies and other neurodegenerative diseases is thought to be mediated by  
275 aggregate spreading across brain regions through a prion-like seeding mechanism<sup>5,6</sup>. We  
276 speculated that the disaggregation activity of VCP could modulate the levels of aggregate species  
277 that are able to induce the aggregation of soluble Tau in recipient cells. To address this  
278 possibility, we measured the presence of seeding-competent TauRD species by FRET in cells  
279 expressing TauRD-mTurquoise2 and TauRD-Y (TauRD-TY cells)<sup>62</sup> (Fig. 6a). Addition of  
280 aggregate-containing total lysates from control TauRD-Y\* cells induced TauRD aggregation in  
281 reporter cells (Supplementary Fig. 10a-b). Strikingly, treatment of TauRD-Y\* cells with the VCP  
282 inhibitor NMS-873 reduced the seeding capacity of lysates by more than 50%, when equivalent  
283 amounts of TauRD-Y were compared (Fig. 6b). In contrast, such a reduction in seeding was not  
284 observed when cells were treated with proteasome inhibitor (Epoxomicin) or Hsp70 inhibitor  
285 (VER-155008) (Fig. 6b). However, treatment with the E1 enzyme inhibitor MLN7243, which  
286 prevented VCP recruitment to the aggregates (Fig. 4c), also caused a ~50% reduction of FRET  
287 positive TauRD-TY reporter cells. Similar effects were observed when lysates from TauRD-Y\*  
288 cells transiently expressing VCP EQ/EQ were used. In contrast, expression of VCP DG did not  
289 reduce seeding (Fig. 6c, Supplementary Fig. 10c). Thus, VCP-mediated disaggregation generates  
290 seeding-active TauRD-Y species.

291 To characterize the seeding competent material in the presence and absence of VCP  
292 function, we fractionated lysates from TauRD-Y\* cells by size-exclusion chromatography.  
293 Inclusions  $>0.2 \mu\text{m}$  were removed by filtration. The majority of the remaining TauRD-Y (~70%)  
294 fractionated at a high molecular weight (HMW) of  $\geq 40$  MDa in the void volume of the column.  
295 The remainder fractionated at a low molecular weight (LMW), equivalent to the position of  
296 soluble TauRD-Y from TauRD-Y cells (Fig. 6d). Both fractions isolated from TauRD-Y\* cells  
297 were seeding competent, but the specific seeding activity of HMW TauRD-Y (% FRET positive  
298 cells per ng TauRD-Y) was ~10-fold higher than that of the LMW fraction (Supplementary Fig.  
299 10d). Treatment with VCP inhibitor NMS-873 strongly reduced the total amount of TauRD-Y  
300 species  $<0.2 \mu\text{m}$ , consistent with the reduced seeding activity after VCP inhibition. Moreover,  
301 the ratio between HMW and LMW peaks was reversed as the former was decreased by ~80%  
302 and the latter by only ~25% (Fig. 6d). However, the specific seeding activity of TauRD in both  
303 fractions remained unchanged (Supplementary Fig. 10d), suggesting that VCP inhibition reduces  
304 the amount of seeds but not their intrinsic seeding potency. Together these results demonstrate  
305 that the disaggregation activity of VCP increases the available pool of seeding competent TauRD  
306 species.

307

## 308 **Discussion**

309 Metazoa do not possess a homologue of the AAA+ ATPase Hsp104 responsible for protein  
310 disaggregation in bacteria, fungi and plants<sup>10,63</sup>. Instead, dissociation of large protein aggregates,  
311 including amyloid fibrils, in animal cells is generally ascribed to the Hsp70/Hsp110/Hsp40  
312 chaperone system<sup>10,12-14,16</sup>. Here we provide evidence that the AAA+ ATPase VCP functions in  
313 disaggregating amyloid fibrils of Tau in human cells and primary mouse neurons (Fig. 7). VCP

314 is distinct from Hsp104 in that it requires the target aggregate to be ubiquitylated, a critical  
315 element of control to ensure specificity and avoid dissolution of functional protein assemblies<sup>64</sup>.  
316 Consistent with such a control function, ubiquitylation likely occurs after aggregate formation as  
317 an essential prerequisite for disaggregation (Fig. 7). The E3 ubiquitin ligases involved in this  
318 process remain to be identified. Moreover, aggregate ubiquitylation ensures that disaggregation  
319 by VCP is coupled to degradation by the 26S proteasome. Additionally, the proteasomal 19S  
320 ATPase may contribute to disaggregation, consistent with its ability to fragment fibrils *in vitro*<sup>65</sup>.  
321 The Hsp70 chaperone system is required for the overall efficiency of the reaction, either by  
322 further dissociating aggregate fragments produced by VCP action or by preventing re-  
323 aggregation of Tau molecules that have been liberated from the fibrils (Fig. 7). As the smaller  
324 TauRD aggregates that accumulated upon Hsp70 inhibition were no longer VCP positive,  
325 disaggregation by VCP may allow Hsp70 to access aggregates of non-ubiquitylated Tau. This  
326 possibility is consistent with the reported ability of the Hsp70 system to disaggregate Tau  
327 aggregates *in vitro*<sup>15</sup>.

328 Support for the physiological relevance of VCP in antagonizing amyloid aggregation is  
329 provided by mutations in VCP that are associated with the deposition of ubiquitylated aggregates  
330 in neurodegenerative diseases such as vacuolar tauopathy and IBMPFD<sup>20,28,58</sup>. However, the  
331 vacuolar tauopathy-associated VCP mutation D395G<sup>20</sup> and the IBMPFD mutations A232E and  
332 R155H<sup>26</sup> did not detectably impair VCP-mediated Tau disaggregation in our cellular model.  
333 Although even a small inhibitory effect on disaggregation may contribute to aggregate pathology  
334 in neurons over decades, the disease mutations may alternatively affect other steps during  
335 aggregate formation, including aggregate seeding and Tau degradation in cooperation with the  
336 proteasome. Indeed, an increase in intracellular aggregation is observed when VCP is inhibited

337 in recipient cells at the time of seeding<sup>61</sup> or when VCP D395G is expressed in the recipient  
338 cells<sup>20</sup>. Note that we introduced the mutant VCP proteins in cells containing preexistent Tau  
339 aggregates to exclude a potential role of VCP in the process of aggregate seeding.

340 Our finding that clearance of Tau aggregates by VCP generates smaller seeding  
341 competent species as a byproduct (Fig. 7) provides a plausible explanation for how VCP can  
342 exert both neuroprotective and neurotoxic effects. Indeed, overexpression of a VCP homologue  
343 in a *Drosophila* model of polyglutamine protein aggregation hastened the degenerative  
344 phenotype<sup>66</sup>. Transcellular aggregate spreading has been recognized as a major driver of  
345 neurodegenerative disease progression<sup>5,6,67</sup>, and generation of seeding competent species may be  
346 an inevitable consequence of amyloid clearance mechanisms via disaggregation, not only by  
347 VCP but also by the Hsp70 system<sup>15</sup>. We note, however, that in contrast to inhibition of VCP,  
348 neither Hsp70 nor proteasome inhibition had a significant effect on the generation of seeding  
349 competent Tau species in our model, suggesting that their function is not directly coupled to seed  
350 production.

351 VCP-mediated aggregate disassembly followed by proteasomal degradation provides an  
352 important alternative to autophagy as a mechanism for the elimination of terminally aggregated  
353 proteins. Based on our results, both activation and inhibition of this pathway may have beneficial  
354 effects dependent on the specific disease context. Non-human AAA+ ATPases with augmented  
355 disaggregase activity are currently being developed with the aim to reverse pathogenic protein  
356 aggregation<sup>68,69</sup>. Boosting cellular aggregate clearance, perhaps in combination with proteasome  
357 activation<sup>70</sup>, may offer a potential therapeutic strategy as long as the production of seeding  
358 competent species can be controlled.

359



360 **Main Figures**

361

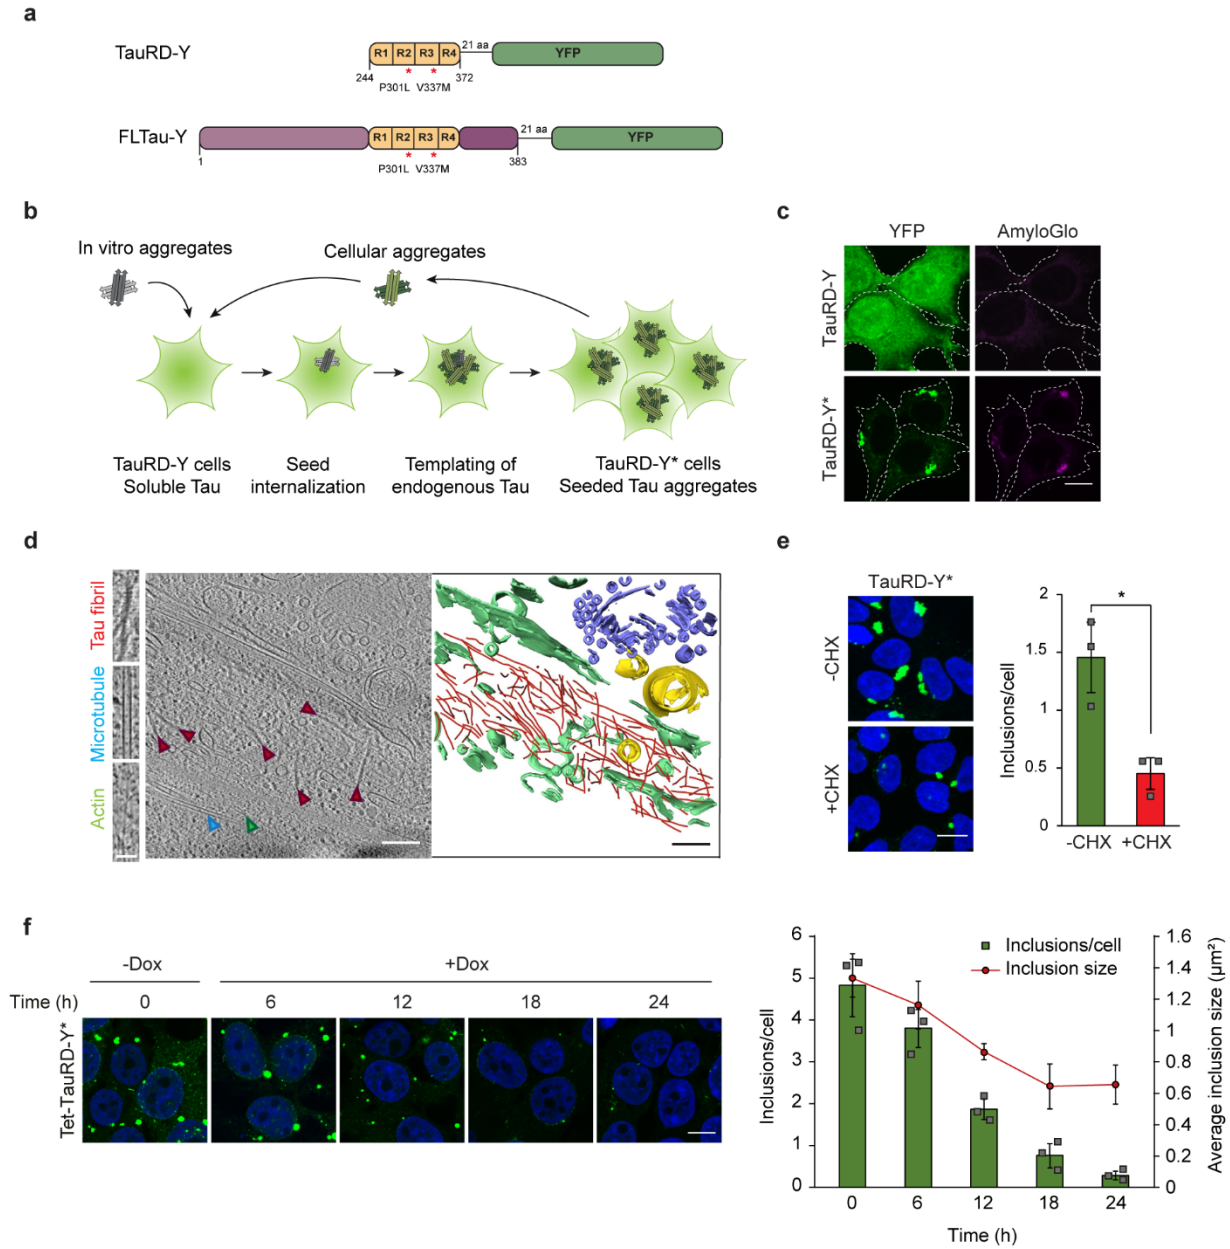

362

363 **Fig. 1 TauRD-Y forms amyloid-like aggregates that are cleared from cells.** **a** Schematic  
 364 representation of Tau constructs used in this study. TauRD-Y, the repeat domain, and FLTau-Y,  
 365 the 0N4R Tau isoform of full-length (FL) Tau with two frontotemporal dementia-associated

366 mutations, P301L and V337M, fused to YFP via 21 amino acid (aa) linkers. **b** Schematic  
367 representation of aggregate seeding. Extracellular addition of preformed Tau aggregates induces  
368 templating of intracellular Tau into aggregates that propagate with cell division. Aggregate seeds  
369 may be generated in vitro or be contained in cell lysate. TauRD-Y, naïve cells containing soluble  
370 TauRD-Y; TauRD-Y\*, cells containing TauRD-Y aggregates. **c** Staining of TauRD-Y and  
371 TauRD-Y\* cells with the amyloid-specific dye Amylo-Glo (magenta). White dashed lines  
372 indicate cell boundaries. Scale bar, 10  $\mu\text{m}$ . **d** TauRD-Y aggregates are fibrillar in structure. Left,  
373 a 1.7 nm thick tomographic slice of a TauRD inclusion from TauRD-Y\* cells is shown. Red,  
374 blue and green arrowheads indicate representative TauRD-Y fibril, microtubule and actin,  
375 respectively. Right, 3D rendering of corresponding tomogram showing TauRD-Y fibrils (red),  
376 Golgi (purple), mitochondria (yellow) and ER (green). Scale bars, 200 nm, inset 40nm.  
377 **e** Aggregate clearance. Left, TauRD-Y\* cells treated for 24 h with cycloheximide (CHX; 50  
378  $\mu\text{g}/\text{mL}$ ) where indicated. Nuclei were counterstained with DAPI (blue). Scale bar, 10  $\mu\text{m}$ . Right,  
379 quantification of TauRD-Y foci. Mean  $\pm$  s.d.; n=3; 500-600 cells analyzed per experiment;  
380 \* $p < 0.05$  ( $p = 0.0151$ ) from two-tailed Student's paired t-test. **f** Left, representative images of Tet-  
381 TauRD-Y\* cells treated with Dox for the indicated times. Right, quantification of inclusions per  
382 cell and average inclusion size ( $\mu\text{m}^2$ ). Mean  $\pm$  s.d.; n=3. Scale bar, 10  $\mu\text{m}$ .

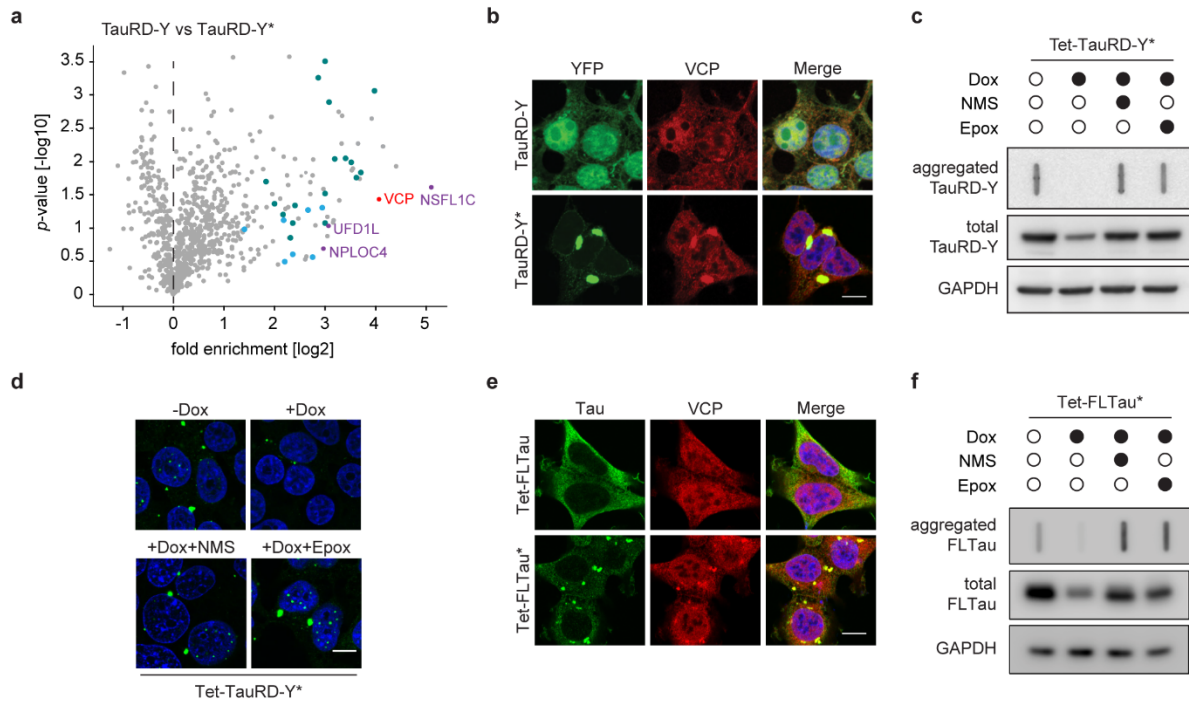

383 **Fig. 2 Disaggregation of Tau aggregates is dependent on VCP activity.** **a** Volcano plot of  
384 TauRD-Y interactome from TauRD-Y and TauRD-Y\* cells. Unlabeled green and blue symbols  
385 represent proteasome subunits of 19S and 20S, respectively. VCP and its cofactors are  
386 highlighted. **b** Association of VCP with TauRD-Y inclusions. Immunofluorescence staining of  
387 VCP (red) and YFP fluorescence of TauRD-Y (green) in TauRD-Y and TauRD-Y\* cells. Scale  
388 bar, 10  $\mu$ m. **c** Filter trap analysis of lysates from Tet-TauRD-Y\* cells treated for 24 h with  
389 doxycycline (Dox; 50 ng/mL) alone or in combination with NMS-873 (NMS; 2.5  $\mu$ M) or  
390 Epoxomicin (Epo; 50 nM). Aggregated and total TauRD-Y levels were determined by  
391 immunoblotting against GFP. GAPDH served as loading control. **d** Representative images of  
392 Tet-TauRD-Y\* cells treated as in (c). Scale bar, 10  $\mu$ m. **e** Association of VCP with FLTau  
393 inclusions. Immunofluorescence staining of VCP (red) and Tau with Tau-5 antibody (green) in  
394 FLTau and FLTau\* cells. Scale bar, 10  $\mu$ m. **f** Filter trap analysis of lysates from Tet-FLTau\*  
395 cells treated for 24 h with doxycycline (Dox; 50 ng/mL) alone or in combination with NMS-873  
396 (NMS; 2.5  $\mu$ M) or Epoxomicin (Epo; 50 nM). Aggregated and total FLTau levels were  
397 determined by immunoblotting using AT8 and Tau-5 antibodies, respectively. GAPDH served as  
398 loading control.  
399

400

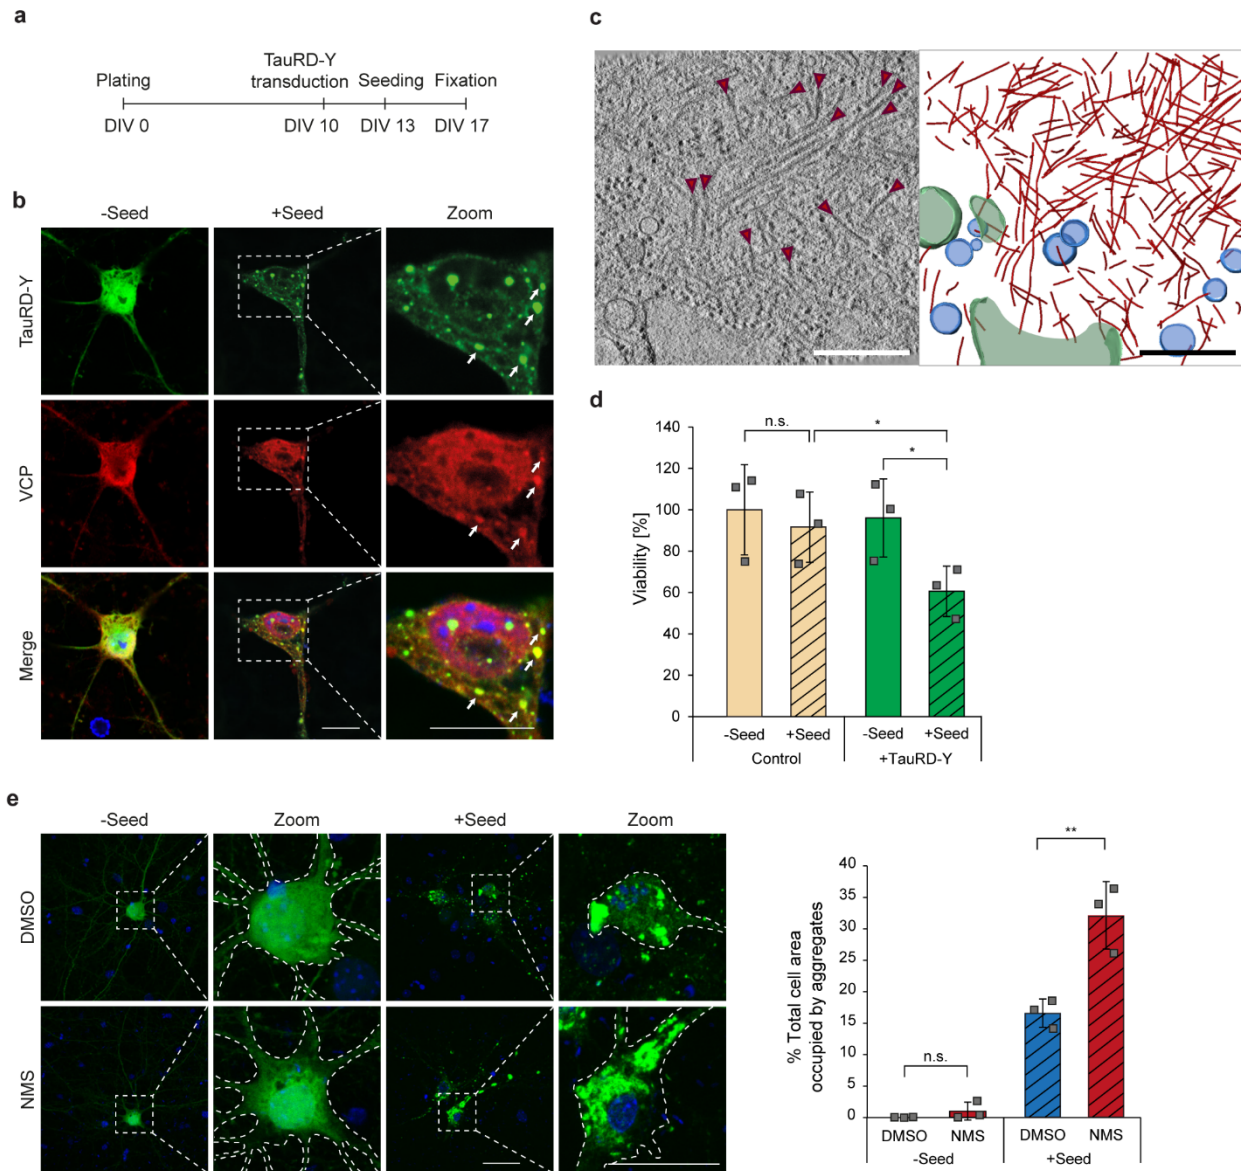

401  
402

403 **Fig. 3 Disaggregation of TauRD-Y aggregates in primary neurons is dependent on VCP**  
 404 **activity.** **a** Schematic representation of experimental timeline in primary neurons. DIV, days in  
 405 vitro. **b** Association of VCP with TauRD-Y inclusions in primary neurons. Immunofluorescence  
 406 staining of VCP (red) and YFP fluorescence of TauRD-Y (green). Arrows point to TauRD-Y  
 407 inclusions containing VCP. Scale bars, 10  $\mu$ m. **c** Fibrillar TauRD-Y aggregates in primary  
 408 neurons. Left, a 1.4 nm thick tomographic slice of a TauRD inclusion from neurons is shown.

409 Red arrows indicate TauRD-Y fibrils. Right, 3D rendering of corresponding tomogram showing  
410 TauRD-Y fibrils (red), vesicles (blue) and ER (green). Scale bar, 350 nm. **d** Toxicity of TauRD-  
411 Y aggregation in primary neurons. Untransduced neurons or neurons transduced with TauRD-Y  
412 were treated with cell lysates containing TauRD-Y aggregates for 4 days where indicated.  
413 Viability was measured using an MTT assay. Mean  $\pm$  s.d.; n=3; \*p<0.05 (Control + Seed vs  
414 TauRD-Y + Seed, p=0.0184; TauRD-Y - Seed vs TauRD-Y + Seed, p=0.142); n.s. non-  
415 significant (Control - Seed vs Control + Seed, p=0.2074) from two-way ANOVA with Tukey  
416 post hoc test. **e** Left, representative images of primary neurons expressing TauRD-Y, exposed to  
417 cell lysates containing TauRD-Y aggregates and treated for 4 h with NMS-873 (NMS; 0.5  $\mu$ M)  
418 where indicated. Scale bars, 20  $\mu$ m. Right, quantification of area occupied by TauRD-Y  
419 aggregates as a percentage of total area of cells. Mean  $\pm$  s.d.; n=3; \*\*p<0.01 (+ Seed + DMSO vs  
420 + Seed + NMS, p=0.0098); n.s. non-significant (- Seed + DMSO vs - Seed + NMS, p=0.2998)  
421 from unpaired t test.  
422



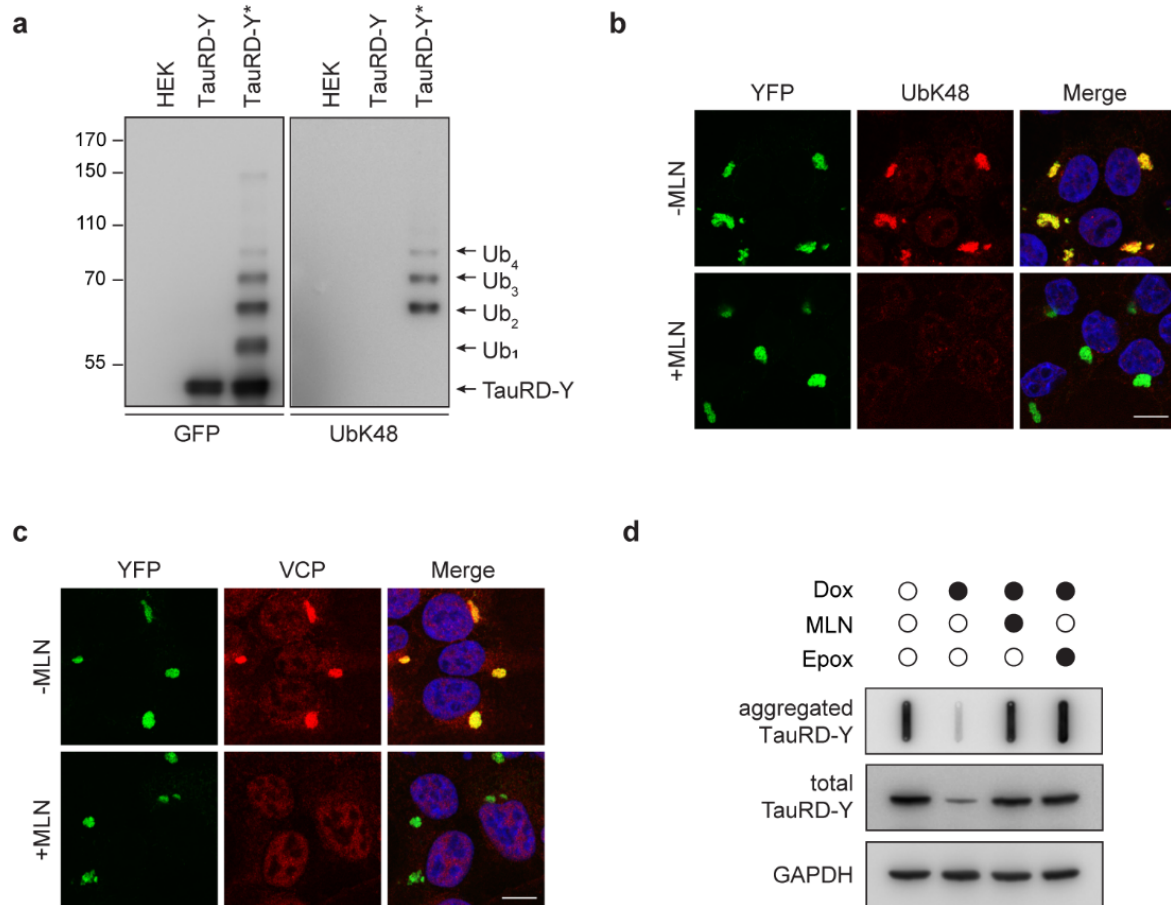

423

424

425 **Fig. 4 Ubiquitination is necessary for VCP recruitment and disaggregation.**

426 **a** Immunoprecipitation of TauRD-Y from lysates of control HEK cells, TauRD-Y and TauRD-

427 Y\* cells in the presence of 0.1% SDS using anti-GFP beads. Eluates were analyzed by

428 immunoblotting with antibodies against GFP and K48-linked ubiquitin chains (UbK48). The

429 TauRD-Y band shows the unmodified protein and arrowheads point at increments in ubiquitin

430 conjugation (Ub<sub>1</sub>-Ub<sub>4</sub>). **b** Inhibition of ubiquitylation of TauRD inclusions. TauRD-Y\* cells

431 were treated for 12 h with MLN7243 (MLN; 0.5 μM) followed by immunofluorescence analysis

432 with a UbK48 antibody (red). **c** Inhibition of TauRD ubiquitylation prevents VCP association.

433 TauRD-Y\* cells were treated as in (b). VCP (red) was visualized by immunofluorescence. Scale

434 bars: 10 μm. **d** Filter trap analysis of lysates from Tet-TauRD-Y\* cells treated for 24 h with 50

435 ng/mL doxycycline alone or in combination with 0.2  $\mu$ M MLN7243 or 50 nM Epoxomicin.

436 Aggregated and total TauRD-Y levels were determined by immunoblotting against GFP.

437 GAPDH served as loading control.

438



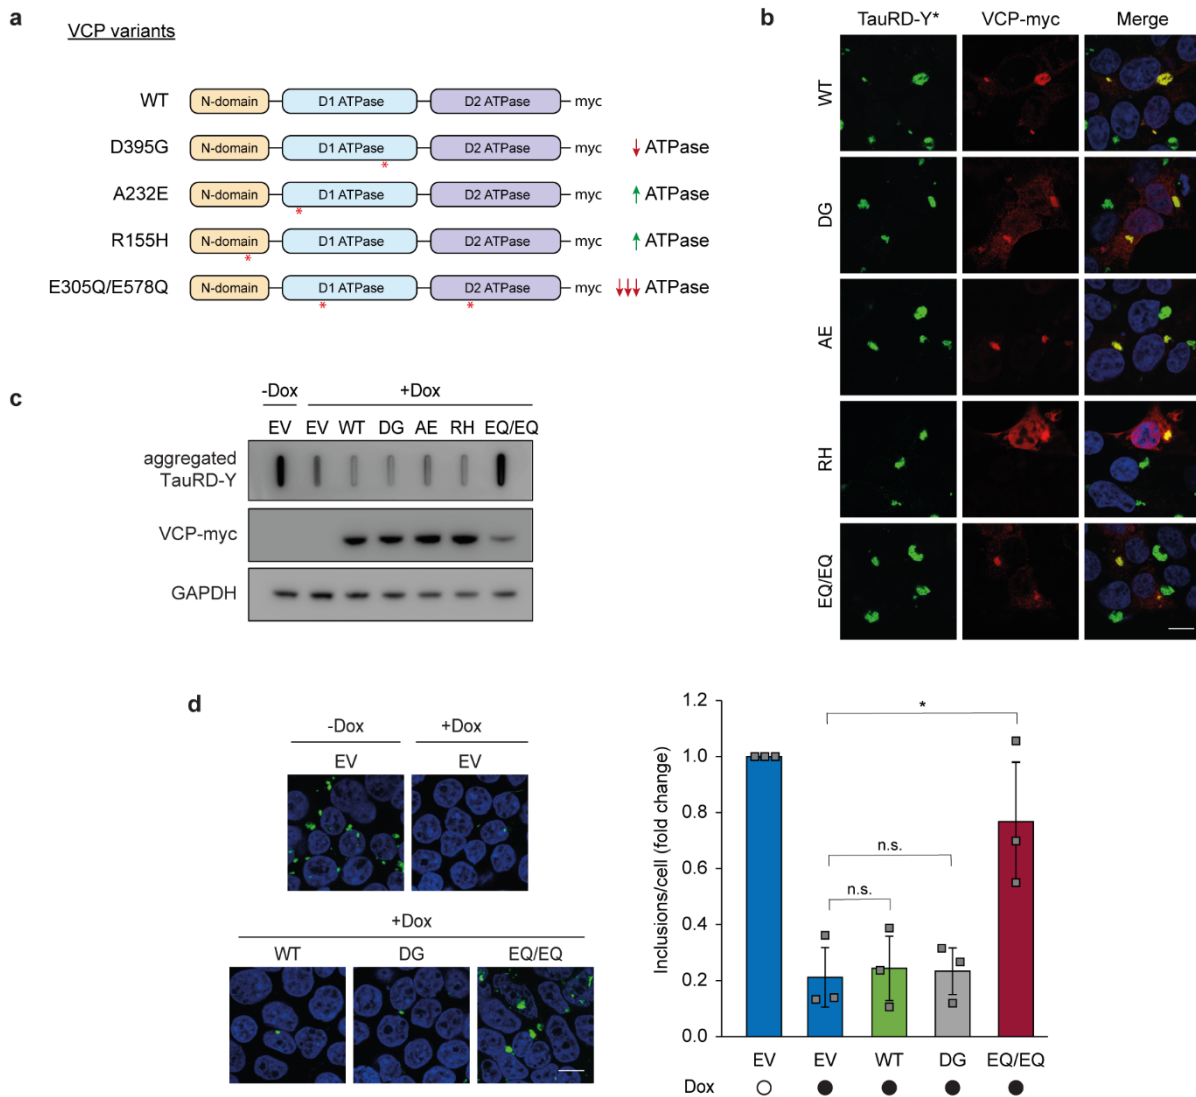

439 **Fig. 5 Effects of VCP mutants on Tau disaggregation.** **a** Schematic representation of VCP  
 440 variants used in this study. Wild type (WT), D395G (DG), A232E (AE), R155H (RH) and  
 441 E305Q/E578Q (EQ/EQ) VCP were tagged with a C-terminal myc-tag. Red asterisks indicate  
 442 relative positions of the mutations. **b** Association of transiently expressed VCP variants with  
 443 TauRD-Y inclusions. Immunofluorescence staining of myc (red) and YFP fluorescence of  
 444 TauRD-Y (green) in TauRD-Y\* cells. Scale bar, 10  $\mu$ m. **c** Filter trap analysis of lysates from

445 Tet-TauRD-Y\* cells transiently transfected with empty vector (EV) or indicated VCP variants  
446 for 24 h, and treated for another 24 h with doxycycline (Dox; 50 ng/mL). Aggregated TauRD-Y  
447 and overexpressed VCP levels were determined by immunoblotting against GFP and myc,  
448 respectively. GAPDH served as loading control. **d** Left, representative images of Tet-TauRD-Y\*  
449 cells treated as in (c). Scale bar, 10  $\mu$ m. Right, quantification of aggregate foci in (d). Mean  $\pm$   
450 s.d.; n=3; > 400 cells analyzed per experiment; \*p<0.05 (EV + Dox vs EQ/EQ + Dox, p=  
451 0.0209); n.s. non-significant (EV + Dox vs WT + Dox, p= 0.5017; EV + Dox vs DG + Dox, p=  
452 0.7172) from two-tailed Student's paired t-test.

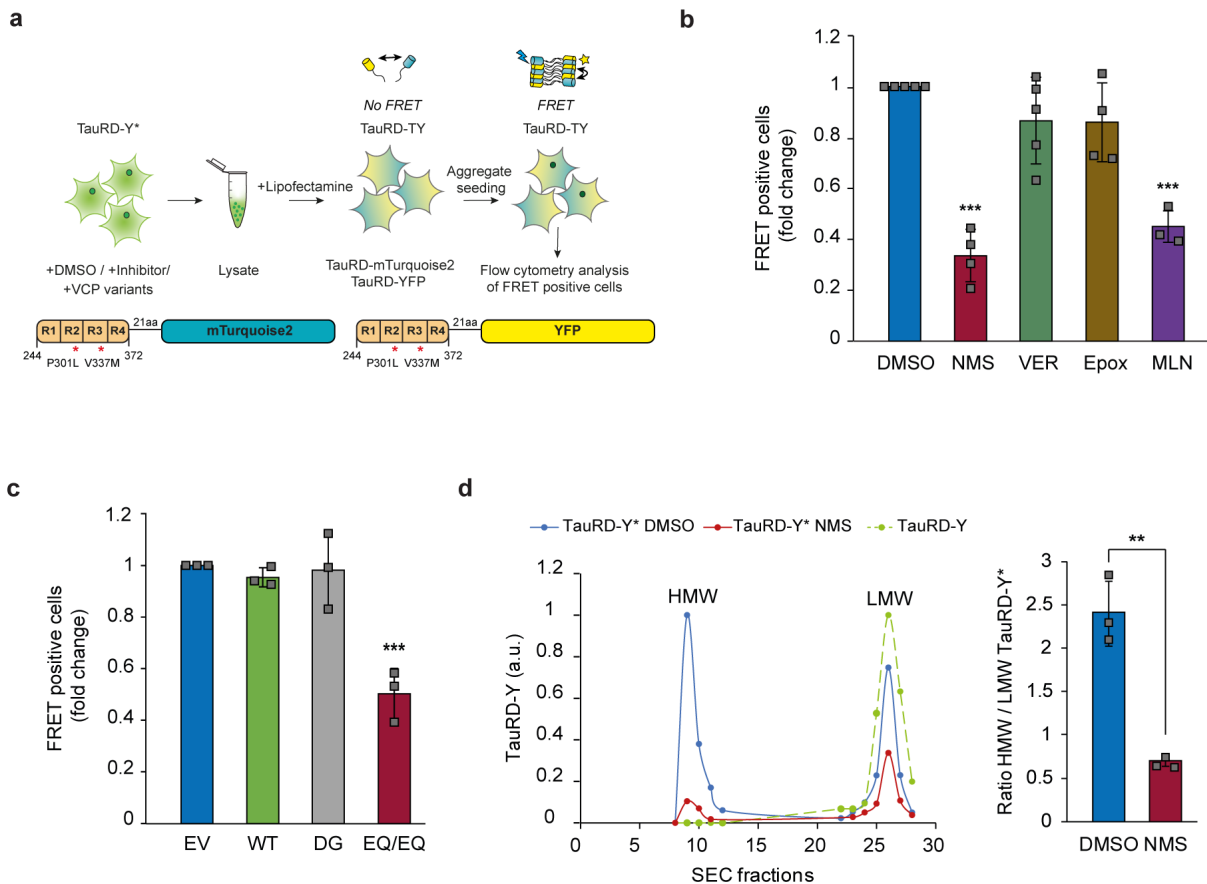

453 **Fig. 6 VCP-mediated disaggregation generates seeding-competent TauRD-Y species.**

454 **a** Experimental scheme to assess the effects of inhibitors of VCP, Hsp70, proteasome and  
 455 ubiquitylation on the level of TauRD-Y aggregate seeds in TauRD-Y\* cells. **b** Flow cytometry  
 456 analysis of aggregate seeding in TauRD-TY reporter cells after addition of lysates from TauRD-  
 457 Y\* cells treated with NMS (VCP inhibitor), VER (Hsp70 inhibitor), Epox (proteasome inhibitor)  
 458 and MLN (ubiquitylation inhibitor). Fold changes with respect to DMSO treated cells are shown.  
 459 Mean  $\pm$  s.d.; NMS and Epox n=4, VER n=5, MLN n=3; \*\*\*p<0.001 (DMSO vs NMS, p=8.69 x  
 460 10<sup>-7</sup>; DMSO vs MLN, p=4.2 x 10<sup>-5</sup>) from one-way ANOVA with Tukey post hoc test. **c** Flow  
 461 cytometry analysis of aggregate seeding in TauRD-TY reporter cells after addition of lysates  
 462 from TauRD-Y\* cells transfected with empty vector (EV), wild-type (WT), D395G (DG) and

463 ATPase deficient E305Q/E578Q (EQ/EQ) VCP constructs. Fold changes with respect to EV  
464 transfected cells are shown. Mean  $\pm$  s.d. n=3; \*\*\*p<0.001 (EV vs EQ/EQ, p= 0.0007) from one-  
465 way ANOVA with Tukey post hoc test. **d** Left, fractionation of TauRD-Y from DMSO and  
466 NMS-873 treated lysates of TauRD-Y\* cells by size exclusion chromatography (SEC). Equal  
467 amounts of total lysate protein were analyzed. Y-axis represents the relative amount of TauRD-Y  
468 in the high molecular weight (HMW) and the low molecular weight (LMW) fractions quantified  
469 by immunoblotting. Right, ratio of TauRD-Y in HMW/LMW fractions. Mean  $\pm$  s.d.; n=3.  
470 \*\*p<0.01 (p= 0.002) from two-tailed Student's paired t-test.

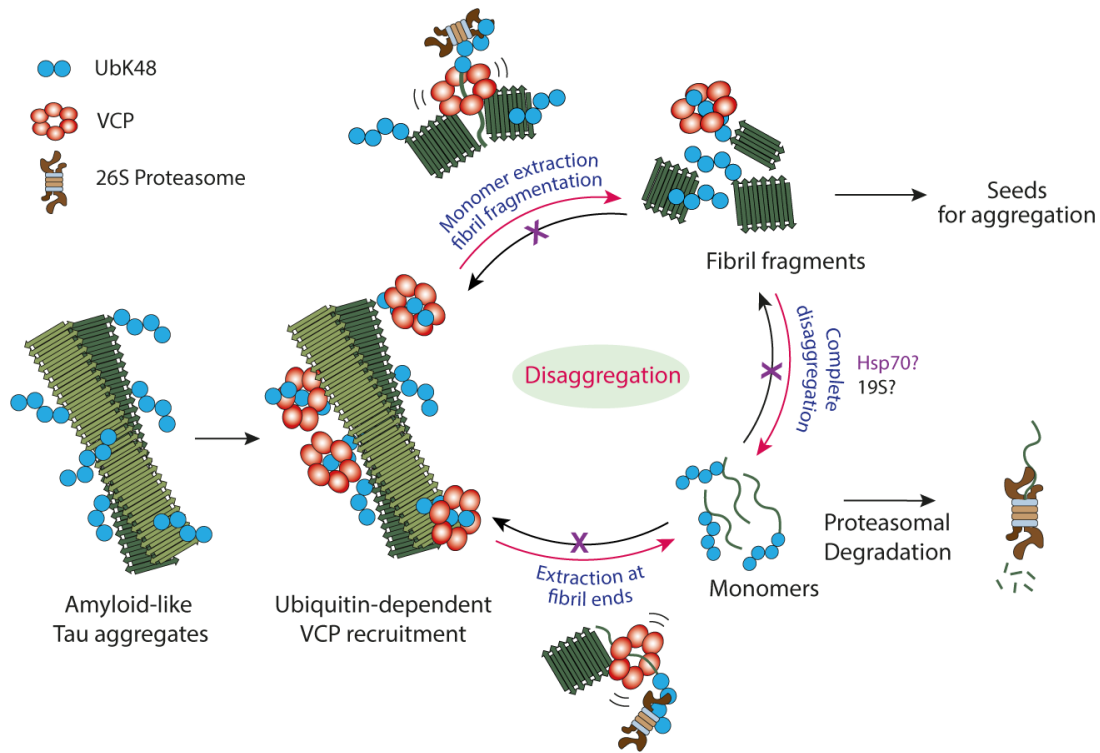

471

472 **Fig. 7 Model of VCP-mediated disaggregation of amyloid-like Tau aggregates.** Modification

473 of aggregates with K48-linked ubiquitin chains allows recruitment of VCP. VCP may extract

474 ubiquitylated Tau monomer from fibril ends or from within fibrils. Monomers are directly

475 targeted for proteasomal degradation. Extraction from internal sites results in fibril fragmentation

476 and generation of oligomers that act as seeds for aggregation. Completion of oligomer

477 disaggregation may be accomplished by the 19S proteasome, perhaps with participation of the

478 Hsp70 system (purple). Hsp70 may also contribute to aggregate clearance by preventing re-

479 aggregation of disaggregation products.

480

481 **Methods**

482 Plasmids

483 The N1-TauRD (P301L/V337M)-EYFP and N1-FLTau (0N4R, P301L/V337M)-EYFP  
484 constructs were previously described<sup>37,62</sup>. To generate TauRD (P301L/V337M) and FLTau  
485 (0N4R, P301L/V337M) without fluorescent tag, a stop codon was introduced in the N1-TauRD  
486 (P301L/V337M)-EYFP and N1-FLTau (0N4R, P301L/V337M)-EYFP plasmids after the Tau  
487 sequence using the Q5 site directed mutagenesis (SDM) kit (New England Biolabs). Tau  
488 fragments were subcloned into pcDNA3.1 by restriction digestion and further into pCW57.1-  
489 MAT2A all-in-one tet-off lentiviral backbone (a gift from David Sabatini (Addgene plasmid #  
490 100521))<sup>71</sup> by Gibson assembly. TauRD (P301L/V337M) construct contains a C-terminal myc-  
491 tag separated from TauRD by a 4 aa (GGSG) linker.

492 Wild type (WT) VCP (Addgene #23971), A232E VCP (Addgene #23973), R155H VCP  
493 (Addgene #23972) and E305Q/E578Q VCP (Addgene #23974) sequences were derived from  
494 plasmids described previously<sup>34</sup>. A C-terminal myc tag and stop codon was introduced using  
495 SDM followed by subcloning the VCP-myc fragments into pcDNA3.1. The D395G VCP  
496 construct was generated by introducing the D395G mutation in WT-VCP plasmid by SDM. All  
497 mutations were verified by sequencing. The plasmid expressing wild type firefly luciferase fused  
498 to EGFP (Fluc-GFP) was previously described<sup>56</sup>.

499 Lentiviral packaging plasmid pVsVg was a gift from Dieter Edbauer. psPAX2 (Addgene  
500 #12260) and pMD2.G (Addgene #12259) also used for lentiviral production were gifts from  
501 Didier Trono. pFhSynW2 TauRD (P301L/V337M)-EYFP used for TauRD-EYFP expression in  
502 mouse primary neurons was previously described<sup>62</sup>.

503

504 Cell lines and cell culture

505 Cells expressing constitutive and tet-regulated TauRD-Y (TauRD-Y and Tet-TauRD-Y cell  
506 lines, respectively), FRET biosensor TauRD-TY, and FLTau-Y cells were previously  
507 described<sup>37,62</sup>. Tet-FLTau and Tet-TauRD cell lines were generated by transducing HEK293T  
508 cells with 200  $\mu$ L concentrated lentivirus in presence of 0.8  $\mu$ g/mL Polybrene (Sigma).  
509 Transduced cells were selected with 10  $\mu$ g/mL Blasticidin (Thermo) and thereafter sorted in 96  
510 well-plates with a BD FACS Aria III (BD Biosciences) (Imaging Facility, MPI Biochemistry).  
511 Monoclonal cell lines stably expressing FLTau and TauRD were screened by  
512 immunofluorescence staining and immunoblotting followed by amplification.

513 All cell lines were cultured in Dulbecco's Modified Eagle Medium (Biochrom)  
514 supplemented with 10% FBS (Gibco), 2 mM L-glutamine (Gibco), 100 units/mL penicillin and  
515 100  $\mu$ g/mL streptomycin (Gibco), and non-essential amino acid cocktail (NEAA) (Gibco) and  
516 grown at 37 °C at 5% CO<sub>2</sub>. TauRD-TY and FLTau-Y cells were maintained in presence of  
517 200  $\mu$ g/mL G418 (Gibco). HEK293 cells stably expressing Fluc-GFP were maintained in  
518 presence of 50  $\mu$ g/mL hygromycin (Thermo).

519

520 Generation of cell lines propagating Tau aggregates

521 Tau aggregation was induced by addition of TauRD aggregates as described previously<sup>37</sup>.  
522 Briefly, HEK293 cells expressing TauRD-Y were initially treated with fibrillar aggregates  
523 generated in vitro from purified TauRD and clones that displayed the ability to maintain TauRD-  
524 Y aggregates for multiple passages were selected. Aggregate-containing TauRD-Y\* cells were  
525 lysed in Triton buffer (0.05% Triton X-100/PBS (Gibco) supplemented with protease inhibitor  
526 cocktail (Roche, EDTA-free) and benzonase (prepared in-house)) and kept on ice for 20 min.

527 Cell lysate was centrifuged at 1,000 x g for 5 min and the supernatant was collected. Protein  
528 concentration in cell lysates was determined using Bradford assay (Bio-Rad). 30 µg of freshly  
529 prepared lysate was diluted in 100 µL Opti-MEM Reduced Serum Medium (Gibco). In a  
530 separate tube 4 µL Lipofectamine 2000 was diluted in 100 µL Opti-MEM and incubated at room  
531 temperature (RT) for 5 min. Contents of the tubes were gently mixed and incubated at RT for 20  
532 min. The lysate-lipofectamine mixture was applied to naïve cells expressing soluble TauRD-Y,  
533 plated at 150,000 cells/well in a 12-well plate. 24 h later, cells were transferred to a 6-well plate  
534 and 3 days later to 10 cm dishes (<200 cells per dish) for 8 days, until clearly visible colonies  
535 were observed. Colonies were screened for the presence of YFP positive aggregates with an  
536 Axio Observer fluorescent microscope (Zeiss). Monoclonal cells displaying aggregate  
537 morphology similar to parental cells were amplified and frozen until use. TauRD, FLTau and  
538 FLTau-Y expressing cells were similarly seeded with cellular TauRD aggregates<sup>37</sup> and cultured  
539 for several days before experiments were performed with a polyclonal cell population.

540

#### 541 Lentivirus production

542 For primary neuron transduction: HEK293T cells (LentiX 293T cell line, Takara) for lentiviral  
543 packaging were expanded to 70-85% confluency in DMEM Glutamax (+4.5 g/L D-glucose, -  
544 pyruvate) supplemented with 10% FBS (Sigma), 1% G418 (Gibco), 1% NEAA (Thermo Fisher)  
545 and 1% HEPES (Biomol). Only low passage cells were used. For lentiviral production, a three-  
546 layered 525 cm<sup>2</sup> flask (Falcon) was seeded and cells were henceforth cultured in medium without  
547 G418. On the following day, cells were transfected with the expression plasmid pFhSynW2  
548 (TauRD-Y), the packaging plasmid psPAX2 and the envelope plasmid pVsVg using TransIT-  
549 Lenti transfection reagent (Mirus). The transfection mix was incubated for 20 min at RT. The



550 cell medium was exchanged in the meantime. 10 mL of transfection mix was added to the flask,  
551 followed by incubation overnight. The medium was exchanged on the following day. After 48-  
552 52 h, culture medium containing the viral particles was collected and centrifuged for 10 min at  
553 1,200 x g. The supernatant was filtered through 0.45 µm pore size filters using 50 mL syringes,  
554 and Lenti-X concentrator (Takara) was added. After an overnight incubation at 4 °C, samples  
555 were centrifuged at 1,500 x g for 45 min at 4 °C, the supernatant was removed and the lentivirus  
556 pellet was resuspended in 150 µL TBS-5 buffer (50 mM Tris-HCl pH 7.8, 130 mM NaCl, 10  
557 mM KCl, 5 mM MgCl<sub>2</sub>). After aliquoting, lentivirus was stored at -80 °C.  
558 For HEK293T transduction: HEK293T cells (LentiX 293T cell line, Takara) were transfected in  
559 10 cm dishes with packaging plasmid psPAX2, envelope plasmid pMD2.G and expression  
560 plasmids (pCW Tet-off FLTau and TauRD) using Lipofectamine 3000. 48 h later virus-  
561 containing media was harvested and centrifuged for 5 min at 1,000 x g. Lenti-X concentrator was  
562 added to supernatant, incubated overnight at 4 °C and the following day centrifuged for 45 min  
563 at 1,500 x g at 4 °C. The lentiviral pellet was resuspended in 1 mL PBS, aliquoted and stored at -  
564 80 °C.

565

### 566 Primary neuronal cultures

567 Primary cortical neurons were prepared from E15.5 CD-1 wild type mouse embryos. All  
568 experiments involving mice were performed in accordance with the relevant guidelines and  
569 regulations. Pregnant female mice were sacrificed by cervical dislocation. The uterus was  
570 removed from the abdominal cavity and placed into a 10 cm sterile Petri dish on ice containing  
571 dissection medium, consisting of Hanks' balanced salt solution (HBSS) supplemented with  
572 0.01 M HEPES, 0.01 M MgSO<sub>4</sub> and 1% penicillin/streptomycin. Each embryo was isolated,

573 heads were quickly cut, and brains were removed from the skull and immersed in ice-cold  
574 dissection medium. Cortical hemispheres were dissected, and meninges were removed. The  
575 cortices were collected in a 15 mL sterile tube and digested with 0.25% trypsin containing 1 mM  
576 ethylenediaminetetraacetic acid (EDTA) and 15  $\mu$ L 0.1% DNase I for 20 min at 37 °C. The  
577 digestion was stopped by removing the supernatant and washing the tissue twice with  
578 Neurobasal medium (Invitrogen) containing 5% FBS. The tissue was resuspended in 2 mL  
579 Neurobasal medium and triturated to achieve a single cell suspension. Cells were spun at 130 x  
580 g, the supernatant was removed, and the cell pellet was resuspended in Neurobasal medium with  
581 2% B-27 supplement (Invitrogen), 1% L-glutamine (Invitrogen) and 1% penicillin/streptomycin  
582 (Invitrogen). For immunofluorescence microscopy, neurons were cultured in 24-well plates on  
583 13 mm coverslips coated with 1 mg/mL poly-D-lysine (Sigma) and 1  $\mu$ g/mL laminin (Thermo  
584 Fisher Scientific) (100,000 neurons per well). For biochemical assays, neurons were cultured in  
585 12-well plates coated in the same way (200,000 neurons per well). For viability measurements,  
586 neurons were cultured in 96-well plates coated in the same way (18,000 neurons per well).  
587 Lentiviral transduction was performed at 10 days in vitro (DIV 10). Virus preparation was  
588 thawed and immediately added to freshly prepared neuronal culture medium. Neurons in 24-well  
589 plates received 1  $\mu$ L of virus per well. Neurons in 12-well plates received 1.5  $\mu$ L of virus per  
590 well. Neurons in 96-well plates received 0.15  $\mu$ L of virus per well. A fifth of the medium from  
591 cultured neurons was removed and the equivalent volume of virus-containing medium was  
592 added. Three days after transduction (DIV 13), 2, 6 or 12  $\mu$ g of HEK293 cell lysate containing  
593 TauRD-Y aggregates, mixed with fresh medium (one tenth of medium volume in the well), were  
594 added to the neuronal cultures in 96, 24 or 12-well plates, respectively. HEK293 cell lysate for

595 neurons was prepared by brief sonication of aggregate-containing cells in PBS. Six days after  
596 transduction (DIV 16), neurons were treated with inhibitor or DMSO as control.

597

#### 598 Neuronal viability assay

599 Viability of transduced neurons was determined using Thiazolyl Blue Tetrazolium Bromide  
600 (MTT; Sigma-Aldrich). Seven days after transduction (DIV 17), cell medium was exchanged for  
601 100  $\mu$ L of fresh medium, followed by addition of 20  $\mu$ L of 5 mg/ml MTT/PBS and incubation  
602 for 4 h at 37 °C, 5% CO<sub>2</sub>. Subsequently, 100  $\mu$ L solubilizer solution (10% SDS, 45%  
603 dimethylformamide in water, pH 4.5) was added, and on the following day absorbance was  
604 measured at 570 nm. Each condition was measured in triplicates per experiment and absorbance  
605 values were averaged for each experiment. The individual values for the ‘Control-Seed’  
606 condition obtained for each of the three experiments were normalized by the mean of these  
607 values. The values of all other conditions were normalized by the new value of the ‘Control-  
608 Seed’ condition of the corresponding independent experiment.

609

#### 610 Plasmid and siRNA transfection

611 Plasmids were transfected with Lipofectamine 2000 (Thermo) after manufacturer’s instructions  
612 in 12- or 6-well plates using 2 or 4  $\mu$ g DNA. All siRNAs were obtained from Dharmacon as ON-  
613 TARGETplus SMART pools: VCP (L-008727-00-0005), Atg5 (M-004374-04-0005), Atg7 (L-  
614 020112-00-0005), PSMD11 (L-011367-01-0005), non-targeting control (D-001810-03-20). Cells  
615 were plated in 24-well plates in 500  $\mu$ L antibiotic free DMEM. 2  $\mu$ L of Dharmafect transfection  
616 reagent and 50-100 nM of siRNA were diluted each in 50  $\mu$ L Opti-MEM and incubated at RT for  
617 5 min. Contents of the tubes were mixed gently by pipetting and incubated further at RT for 15

618 min. Subsequently, the transfection mixture was added to the cells drop-wise. 24 h later cells  
619 were split and plated in 12- or 6-well plates and allowed to grow for up to 96 h before  
620 immunoblotting or immunofluorescent staining.

621

### 622 Antibodies and chemicals

623 The following primary antibodies were used for immunoblotting or immunofluorescent staining:  
624 anti-VCP (AbCam #ab11433), anti-VCP (Novus Biologicals #NB100-1558) (Fig. 2e and  
625 Supplementary Fig. 9a), anti-GFP (Roche #11814460001), anti-ubiquitin Lys48-specific  
626 (Millipore #05-1307), anti-ubiquitin Lys63-specific (AbCam #ab179434), anti-ubiquitin (P4D1)  
627 (SantaCruz #sc-8017), anti-Tau (pS356) (GeneTex #GTX50165), anti-phospho-Tau (S202,  
628 T205) (Thermo #MN1020), anti-NPLOC4 (Sigma #HPA021560), anti-UFD1L (AbCam  
629 #ab96648), anti-ubiquitin FK2 (Millipore #04-263), anti-Tau (Tau-5) (Thermo #MA5-12808),  
630 anti-human Tau/Repeat Domain (2B11) (IBL #JP10237), anti-LC3B (Sigma #L7543), anti-Atg5  
631 (Cell Signalling #2630S), anti-Atg7 (Cell Signalling #8558), anti-PSMD11 (Proteintech #14786-  
632 1-AP), anti-myc (in house, 9E10), anti-GAPDH (Millipore #MAB374), anti-Tubulin (Sigma  
633 #T6199).

634 The following secondary antibodies were used: Cy5-conjugated anti-mouse (Thermo #A10524),  
635 Cy-5 conjugated anti-rabbit (Thermo #A10523), Alexa Fluor 647 AffiniPure anti-mouse  
636 (Jackson ImmunoResearch #715-605-151), DyLight 488 anti-mouse (Thermo #SA5-10166),  
637 anti-mouse IgG peroxidase conjugate (Sigma #A4416) or anti-rabbit peroxidase conjugate  
638 (Sigma #A9169), IRDye 680RD anti-mouse (LI-COR #926-68070), IRDye 800CW anti-rabbit  
639 (LI-COR #926-32211).

640 The following chemicals were used: Cycloheximide (Sigma), doxycycline (Sigma), 3-  
641 methyladenine (Invivogen), bafilomycin A1 (Invivogen), epoxomicin (Cayman Chemical),  
642 NMS-873 (Sigma), CB-5083 (Cayman Chemical), VER-155008 (Sigma), MLN7243  
643 (Chemietek). Solutions in DMSO were stored at -20 °C. 3-Methyadenine was dissolved in H<sub>2</sub>O  
644 after manufacturer's instructions and applied immediately to cells.

645

#### 646 Immunofluorescence staining

647 HEK293 cells were grown on poly-L-lysine (NeuVibro) coated glass coverslips for 24-48 h in  
648 12-well plates before any treatment. At the end of the experiment, media was aspirated and cells  
649 were directly fixed in 4% formaldehyde (w/v) (Thermo, Methanol-free) in PBS for 10 min at RT,  
650 washed once with PBS and permeabilized in 0.1% Triton X-100/PBS for 5 min. Samples were  
651 blocked using 5% low-fat dry milk dissolved in 0.1% Triton X-100/PBS for 1 h at RT, followed  
652 by incubation with primary antibodies in blocking solution and fluorescently labelled secondary  
653 antibodies in PBS. Nuclei were counterstained with DAPI. For amyloid staining, after fixation  
654 and permeabilization, cells were incubated with Amylo-Glo (Biosensis TR-300-AG) at a dilution  
655 of 1:200/PBS with gentle shaking followed by washing twice with PBS. Cells were not  
656 counterstained with DAPI. Coverslips were mounted in fluorescent mounting medium (Dako) on  
657 glass slides and stored at 4 °C until imaging.

658 *Primary neurons:* Primary neurons were fixed at DIV 17 with 4% paraformaldehyde  
659 (Santa Cruz) (PFA)/PBS for 15 min; remaining free aldehyde groups of PFA were blocked with  
660 50 mM ammonium chloride/PBS for 10 min at RT. Cells were rinsed once with PBS and  
661 permeabilized with 0.25% Triton X-100/PBS for 5 min. After washing with PBS, blocking  
662 solution consisting of 2% BSA (w/v) (Roth) and 4% donkey serum (v/v) (Jackson

663 ImmunoResearch Laboratories) in PBS was added for 30 min at RT. Coverslips were transferred  
664 to a light protected humid chamber and incubated with primary antibodies diluted in blocking  
665 solution for 1 h. Cells were washed with PBS and incubated with secondary antibody diluted in  
666 blocking solution for 30 min and counterstained with DAPI. Coverslips were mounted using  
667 Prolong Glass fluorescence mounting medium (Invitrogen).

668

#### 669 Image acquisition (Microscopy)

670 Images were acquired with a Zeiss LSM 780, Leica SP8 FALCON (Imaging Facility, MPI  
671 Biochemistry) or a Leica TCS SP8 Laser-scanning confocal microscope (Imaging Facility, MPI  
672 Neurobiology) and analyzed using FIJI/ImageJ software. For multicolor imaging, samples  
673 stained with individual fluorophores were used to correct emission bandwidths and exposure  
674 settings to minimize spectral crossover.

675

#### 676 Quantification of aggregates/cell and average size

677 Confocal z-stacks were used to create a maximum intensity projection (MIP) using the image  
678 acquisition software ZEN (Zeiss). MIPs were further segmented to define aggregate foci by  
679 thresholding. Aggregate number and size were computed by the Analyze Particle function (Size:  
680 0-infinity). Cell numbers were determined by counting DAPI stained nuclei with the Cell  
681 Counter plugin. Experiments were performed at least 3 times in biologically independent repeats.  
682 For neuronal aggregates, neuronal cytoplasm area was calculated by manually selecting a region  
683 of interest (ROI) around the soma of the neuron and utilizing the Analyze feature. Aggregate foci  
684 were identified by thresholding the MIP images and aggregate size (area), within the previously  
685 selected ROI, was calculated by the Analyze Particle function. The percentage of total neuron

686 area occupied by aggregate was the quotient of the division between aggregate area and neuronal  
687 cytoplasmic area: (Aggregate area)/(Cytoplasm area) x 100. 60 individual neurons were imaged  
688 per condition, in 3 biologically independent replicates.

689

#### 690 mRNA quantification

691 Total RNA was isolated using the RNeasy Mini Kit (Qiagen) and reverse transcribed with  
692 iScript™ cDNA Synthesis Kit (Biorad) according to manufacturers' instructions. Quantitative  
693 real-time PCR was performed with PowerUp™ SYBR™ Green Master Mix (Applied  
694 Biosystems) with a StepOnePlus Real-Time PCR System (Applied Biosystems). CT values were  
695 measured and fold changes calculated by the  $\Delta\Delta C(T)$  method<sup>72</sup> using the RPS18 gene as  
696 reference. The following primers were used: RPS18 forward 5'-  
697 TGTGGTGTGAGGAAAGCA-3' and reverse 5'- CTTCAGTCGCTCCAGGTCTT-3'; Tau  
698 forward: 5'-AGCAACGTCCAGTCCAAGTG-3' and reverse: 5'-  
699 CCTTGCTCAGGTCAACTGGT-3'.

700

701 Correlative light and electron microscopy (CLEM), cryo-focused ion beam (FIB) and cryo-

#### 702 Electron Tomography

703  $2 \times 10^4$  TauRD-Y\* cells or  $1 \times 10^5$  neurons were seeded on EM grids (R2/1, Au 200 mesh grid,  
704 Quantifoil Micro Tools) in a 35 mm dish or 24-well plate and cultured for 24 h or transduced  
705 with lentivirus and treated with aggregate-containing cell lysate as described earlier in section  
706 'Primary neuronal cultures'. The grids were blotted for 10 s using filter paper and vitrified by  
707 plunge freezing into a liquid ethane/propane mixture with a manual plunger. CLEM, cryo-FIB  
708 and tomographic data collection were performed as described in detail before<sup>73</sup>. In brief, EM

709 grids were mounted onto modified Autogrid sample carriers<sup>74</sup> and then transferred onto the cryo-  
710 stage of a CorrSight microscope (FEI) for cryo-light microscopy. Images of the samples and  
711 TauRD-Y signal were acquired with MAPS software (FEI) in transmitted light and confocal  
712 mode using a 5x and 20x lens, respectively. The samples were then transferred into a dual-beam  
713 (FIB/SEM) microscope (Quanta 3D FEG, FEI) using a cryo-transfer system (PP3000T,  
714 Quorum). Cryo-light microscope and SEM images were correlated with MAPS software.  
715 Lamellas (final thickness, 100-200 nm) were prepared using a Ga<sup>2+</sup> ion beam at 30 kV in the  
716 regions of the TauRD-Y fluorescence signal. In case of TauRD-Y\* cells, an additional layer of  
717 platinum was sputter-coated (10 mA, 5 s) on the grids to improve conductivity of the lamellas.

718 The grids were then transferred to a Titan Krios transmission electron microscope (FEI)  
719 for tomographic data collection. For the whole procedure, samples were kept at a constant  
720 temperature of -180 °C. Tomographic tilt series were recorded with a Gatan K2 Summit direct  
721 detector in counting mode. A GIF-quantum energy filter was used with a slit width of 20 eV to  
722 remove inelastically scattered electrons. Tilt series were collected from -50° to +70° with an  
723 increment of 2° and total dose of 110 e<sup>-</sup>/Å<sup>2</sup> using SerialEM software<sup>75</sup> at a nominal magnification  
724 of 33,000x, resulting in a pixel size of 4.21 Å for TauRD-Y\* cells and at a nominal  
725 magnification of 42,000x, resulting in a pixel size of 3.52 Å for the primary neurons. In case of  
726 TauRD-Y\* cells, a Volta phase plate was used together with a defocus of -0.5 μm for contrast  
727 improvement<sup>76</sup>.

728 For image processing of TauRD-Y\* cell tomograms, frames were aligned during data  
729 collection using in-house software K2align based on previous work<sup>77</sup> or in case of the primary  
730 neuron tomograms by using the software Morioncor2 and Tomoman  
731 (<https://github.com/williamnwan/TOMOMAN>). The IMOD software package<sup>78</sup> was used for



732 tomogram reconstruction. The tilt series were first aligned using fiducial-less patch tracking, and  
733 tomograms were then reconstructed by weighted back projection of the resulting aligned images.

734 For segmentation, tomograms were rescaled with a binning factor of four and in case of  
735 the primary neurons tomograms filtered with a deconvolution filter  
736 ([https://github.com/dtegunov/tom\\_deconv](https://github.com/dtegunov/tom_deconv)). Tau filaments were traced with XTracing Module in  
737 Amira using a short cylinder as a template<sup>79</sup>. The membranes were first segmented automatically  
738 with TomoSegMemTV<sup>80</sup> using tensor voting, and then manually optimized in Amira.

739

#### 740 Immunoblotting

741 Cells were lysed in RIPA lysis and extraction buffer (Thermo) supplemented with protease  
742 inhibitor cocktail and benzonase for 30 min on ice with intermittent vortexing. Protein  
743 concentration in total cell lysates was determined using Bradford assay (Bio-Rad) and  
744 normalized in all samples before adding 2x SDS sample buffer. Samples were denatured by  
745 boiling at 95 °C for 5 min. Proteins were resolved on NuPAGE 4-12% gradient gels (Thermo)  
746 with MES or MOPS (Thermo) running buffer at 200 V for 45 min. Proteins were transferred to  
747 nitrocellulose or PVDF membranes (Roche) in tris-glycine buffer at 110 V for 1 h. Membranes  
748 were washed once in TBS-T and blocked in 5% low-fat dry milk dissolved in TBS-T for 1 h at  
749 RT. Subsequently, blots were washed 3 times with TBS-T and probed with primary and  
750 secondary antibodies. Chemiluminescence was developed using HRP substrate (Luminata  
751 Classico, Merk) and detected on a LAS 4000 (Fuji) or ImageQuant800 (Amersham) imager.  
752 AIDA image software (Elysia Raytest) was used to quantify intensity of protein bands.

753

754 Interactome analysis by mass spectrometry

755 *SILAC labelling of cells and TauRD-Y immunoprecipitation:* Interactome analyses were  
756 performed using a stable isotope labelling by amino acids in cell culture (SILAC)-based  
757 quantitative proteomics approach<sup>81</sup>. Frozen TauRD-Y and TauRD-Y\* cells were thawed in  
758 arginine lysine deficient SILAC media (PAA) containing light (L) (Arg<sub>0</sub>, Lys<sub>0</sub>, Sigma) and  
759 heavy (H) (Arg<sub>10</sub>, Lys<sub>8</sub>, Silantes) amino acid isotopes, respectively, and supplemented with 10%  
760 dialyzed FCS (PAA), 2 mM L-glutamine (Gibco), 100 units/mL penicillin and 100 µg/mL  
761 streptomycin (Gibco), and non-essential amino acid cocktail (Gibco). A third cell line, not part of  
762 this study but included in the PRIDE entry PXD023400, was simultaneously expanded in SILAC  
763 medium supplemented with medium (M) (Arg<sub>6</sub>, Lys<sub>4</sub>, Silantes) amino acid isotopes, and was  
764 processed and analyzed together with TauRD-Y and TauRD-Y\* samples. Cells were passaged  
765 for a minimum of two weeks to allow efficient incorporation of amino acid isotopes into the  
766 cellular proteome. Cells from a 10 cm dish were washed in PBS, lysed by gentle pipetting in  
767 400 µL ice cold lysis buffer (1% Triton X-100/PBS supplemented with protease inhibitor  
768 cocktail and benzonase). Lysates were sonicated briefly and centrifuged at 2,000 x g for 5 min at  
769 4 °C. 300 µL of the supernatant was removed and protein concentration was determined using  
770 Bradford assay (Bio-Rad). 50 µL anti-GFP beads (µMACS GFP Isolation kit, Miltenyi Biotech)  
771 were added to 500 µg total protein diluted in a total volume of 800 µL lysis buffer. Lysates were  
772 incubated for 1 h at 4 °C with end over end rotation at 10 rpm. µ-Columns (Miltenyi Biotech)  
773 were placed in the magnetic field of a µMACS Separator (Miltenyi Biotech) and equilibrated  
774 with 250 µL lysis buffer before lysates were applied. Columns were washed 4 times with 1 mL  
775 cold Triton buffer and 2 times with 1 mL PBS followed by elution in 70 µL preheated 1x SDS  
776 sample buffer without bromophenol blue.

777 *MS sample processing:* 20  $\mu$ L sample from each of the H, M and L eluates was mixed  
778 and processed by the filter-aided sample preparation (FASP) method as previously described<sup>82</sup>.  
779 Samples were loaded in a 30 kDa centrifugation device and washed 3 times with 200  $\mu$ L freshly  
780 prepared urea buffer (UB) (8 M urea, 0.1 M Tris pH 8.5). Reduction and alkylation was  
781 performed sequentially using 10 mM DTT and 50 mM iodoacetamide in UB, respectively.  
782 Samples were washed 2 times with 200  $\mu$ L 50 mM ammonium bicarbonate ( $\text{NH}_4\text{HCO}_3$ ) to  
783 remove urea before an over-night trypsin treatment. Peptides were recovered in 40  $\mu$ L  
784  $\text{NH}_4\text{HCO}_3$ , acidified with 12  $\mu$ L of a 25% TFA solution and dried in a vacuum concentrator. The  
785 peptides were further fractionated using home-made SAX columns in 200  $\mu$ L microtips by  
786 stacking 2 punch-outs of Empore High Performance Extraction Disk (Anion-SR) material.  
787 Peptides were sequentially eluted with 6 different Britton & Robinson buffers (BURB) of  
788 decreasing pH (pH 11, 8, 6, 5, 4, 3) and acidified to 1% TFA. The last elution step was with  
789 MeOH/water (1:1)/1% formic acid. The fractionated peptides were desalted with home-made  
790 micro-columns containing C18 Empore disks and eluted with 70% ACN 1% formic acid  
791 followed by drying in a vacuum concentrator. The samples were stored at -20 °C until analysis.  
792 *LC-MS:* The desalted peptides were dissolved in 5  $\mu$ L of 5% formic acid, sonicated in an  
793 ultrasonic bath, centrifuged and transferred to MS autosampler vials. Samples were analyzed on  
794 an Easy nLC-1000 nanoHPLC system (Thermo) coupled to a Q-Exactive Orbitrap mass  
795 spectrometer (Thermo). Peptides were separated on home-made spray-columns (ID 75  $\mu$ m, 20  
796 cm long, 8  $\mu$ m tip opening, NewObjective) packed with 1.9  $\mu$ m C18 particles (Reprosil-Pur C18-  
797 AQ, Dr Maisch GmbH) using a stepwise 115 min gradient between buffer A (0.2% formic acid  
798 in water) and buffer B (0.2% formic acid in acetonitrile). Samples were loaded on the column by  
799 the nanoHPLC autosampler at a flow rate of 0.5  $\mu$ L per min. No trap column was used. The

800 HPLC flow rate was set to 0.25  $\mu$ L per min during analysis. MS/MS analysis was performed  
801 with standard settings using cycles of 1 high resolution (70000 FWHM setting) MS scan  
802 followed by MS/MS scans (resolution 17500 FWHM setting) of the 10 most intense ions with  
803 charge states of 2 or higher.

804 *MS data analysis:* Protein identification and SILAC based quantitation was performed  
805 using MaxQuant (version 1.5.4.1) using default settings. The human sequences of UNIPROT  
806 (version 2019-03-12) were used as database for protein identification. MaxQuant used a decoy  
807 version of the specified UNIPROT database to adjust the false discovery rates for proteins and  
808 peptides below 1%. We used normalized MaxQuant ratios for enrichment analyses to correct for  
809 uneven total protein amounts in the SILAC-labeling states. Proteins quantified in at least 2  
810 experiments with normalized H/L ratios  $\geq 2$  were considered as interactors of TauRD-Y in  
811 TauRD-Y\* cells. Volcano plot was generated using Perseus1.6.2.3.

812

### 813 Biochemical detection of aggregated Tau

814 Cells were lysed for 30 min on ice in lysis buffer followed by brief sonication or 1 h in RIPA  
815 buffer. Lysates were centrifuged at 2,000 or 1,000 x g for 5 min. The supernatant was carefully  
816 removed and protein concentration was normalized across all samples. Lysates were then used  
817 for solubility or filter trap assays. Lysates were centrifuged at 186,000 x g for 1 h at 4 °C.  
818 Supernatant was removed and the pellet was washed with 200  $\mu$ L PBS and centrifuged again for  
819 30 min. Pellets were disintegrated in PBS by pipetting and boiled in 1x SDS sample buffer. Filter  
820 trap assays were performed with 200  $\mu$ g total protein diluted in 200  $\mu$ L lysis buffer. A cellulose  
821 acetate membrane (0.2  $\mu$ m pore size, GE Healthcare) was pre-equilibrated in 0.1% SDS and  
822 affixed to the filter trap apparatus (PR648 Slot Blot Blotting Manifold, Hoefer). Samples were

823 loaded and allowed to completely pass through the filter under vacuum. Wells were washed 3  
824 times with 200  $\mu$ L 0.1% SDS/H<sub>2</sub>O followed by standard immunoblotting of the membrane.

825

#### 826 Detection of Tau ubiquitylation

827 Cells were lysed as described in section Immunoblotting, with the addition of 20 mM N-  
828 ethylmaleimide followed by brief sonication and centrifugation at 2,000 x g for 5 min. Protein  
829 concentration was determined using Bradford assay (Bio-Rad). 50  $\mu$ L anti-GFP beads were  
830 added to 1 mg total protein diluted in a total volume of 600  $\mu$ L RIPA buffer. Lysates were  
831 incubated for 1 h at 4 °C with end over end rotation. Cell lysates were applied to  $\mu$ -columns  
832 equilibrated with 250  $\mu$ L RIPA buffer. Columns were washed 4 times with 1 mL 0.1%  
833 SDS/PBS. Bound proteins were eluted by applying 50  $\mu$ L pre-heated (95 °C) 1x SDS sample  
834 buffer. Input and eluates were resolved on NuPAGE 4-12% gradient gels in MOPS running  
835 buffer and transferred to nitrocellulose membranes. Membranes were probed with antibodies  
836 against GFP or ubiquitin-K48.

837

#### 838 Native-PAGE analysis

839 Tet-TauRD-Y\* cells were plated in 12-well plates and transfected with VCP variants using  
840 Lipofectamine 2000 for 2 days. Cells were then lysed in 50  $\mu$ L 0.5% TritonX-100/PBS  
841 supplemented with protease inhibitor cocktail and benzonase for 1 h on ice. Lysates were  
842 centrifuged at 10,000 x g for 2 min and supernatant was collected. Protein concentration in the  
843 supernatant was determined using Bradford assay and normalized in all samples before adding  
844 2x native sample buffer (40 % glycerol, 240 mM Tris pH 6.8, 0.04 % bromophenol blue).  
845 Samples were analyzed on Novex Value 4 to 12% Tris-glycine gels (Thermo) using 20 mM Tris

846 200 mM Glycine buffer at pH 8.4. Proteins were transferred to nitrocellulose membrane in Tris-  
847 glycine buffer, blocked in 5% low-fat dry milk and co-incubated with primary followed by  
848 fluorescent secondary antibodies. Fluorescent signal was detected on an Odyssey Fc imager (LI-  
849 COR).

850

#### 851 TauRD-Y seeding assay

852 TauRD-Y\* cells were treated with 2  $\mu$ M NMS, 10  $\mu$ M VER or 50 nM epoxomicin for 24 h or  
853 0.5  $\mu$ M MLN for 12 h, or with DMSO as control and lysed on ice in Triton buffer supplemented  
854 with protease inhibitor cocktail and benzonase for 20 min. The amount of TauRD-Y across the  
855 samples was normalized by quantifying TauRD-Y by immunoblotting using anti-GFP antibody  
856 and anti-GAPDH antibody as loading control. Lysates containing equal amounts of TauRD-Y  
857 were combined with Opti-MEM and Lipofectamine 3000, incubated for 20 min at RT and added  
858 to FRET biosensor cells. 24 h later, cells were harvested with trypsin, washed with PBS and  
859 analyzed on an Attune NxT flow cytometer (Imaging Facility, MPI Biochemistry). mTurquoise2  
860 and FRET fluorescence signals were measured by exciting cells with a 405 nm laser and  
861 collecting fluorescent signal with 440/50 and 530/30 filters, respectively. To measure the YFP  
862 fluorescence signal, cells were excited with a 488 nm laser and emission was collected with a  
863 530/30 filter. For each sample 50,000 single cells were evaluated. Data was processed using  
864 FlowJo v10.7.1 software (FlowJo LLC). After gating single cells, an additional gate was  
865 introduced to exclude cells that generate a false-positive signal in the FRET channel due to  
866 excitation at 405 nm<sup>83</sup>. A FRET positive gate was drawn by plotting the FRET fluorescence  
867 signal versus the mTurquoise2 fluorescence signal using unseeded cells as reference.

868

869 Size exclusion chromatography of cell lysates

870 TauRD-Y\* cells that had been treated for 24 h with DMSO or 2  $\mu$ M NMS were analyzed.  
871 Untreated TauRD-Y cells were analyzed as control. Cells were lysed as described in the section  
872 Seeding assay. Lysates were clarified by centrifugation at 1,000 x g for 5 min at 4 °C and filtered  
873 with a PVDF 0.22  $\mu$ m filter (Millex). The total protein amount of the lysates was determined by  
874 Bradford assay (Bio-Rad). 3 mg total protein was loaded on a Superose 6 HR10/30 (GE  
875 Healthcare) column equilibrated with PBS. The individual fractions separated by size exclusion  
876 chromatography were analyzed and quantified by immunoblotting using anti-GFP antibody.  
877 TauRD-Y species were detected in the void volume (HMW) and low molecular weight (LMW)  
878 fractions. Corresponding fractions were pooled and analyzed by immunoblotting using anti-GFP  
879 antibody. Seeding experiments were performed as described above, using 0.5 ng TauRD-Y from  
880 HMW and LMW fractions.

881 Statistical analysis

882 Statistical analysis was performed in Excel, Origin 2019b or GraphPad Prism 7 on data acquired  
883 from at least three independent experiments. Matched samples were compared using two-tailed  
884 Student's paired t-test. For multiple comparisons, one-way ANOVA followed by a Tukey post  
885 hoc test was used.

886 **Data availability**

887 All data supporting the findings of this study are included in the manuscript and the  
888 Supplemental Information, additional data that support the findings of this study are available  
889 from the corresponding author upon reasonable request. The mass spectrometry proteomics data  
890 associated to Fig. 2a have been deposited to the ProteomeXchange Consortium via the PRIDE<sup>84</sup>

- 891 partner repository (<https://www.ebi.ac.uk/pride/archive/>) with the dataset identifier PXD023400.
- 892 This PRIDE entry additionally contains analyses that are not a part of this study.



## 893   **References**

- 894   1       Goedert, M., Eisenberg, D. S. & Crowther, R. A. Propagation of Tau aggregates and  
895       neurodegeneration. *Annu Rev Neurosci* **40**, 189-210 (2017).
- 896   2       Strang, K. H., Golde, T. E. & Giasson, B. I. MAPT mutations, tauopathy, and mechanisms of  
897       neurodegeneration. *Laboratory Investigation* **99**, 912-928 (2019).
- 898   3       Lewis, J. *et al.* Neurofibrillary tangles, amyotrophy and progressive motor disturbance in mice  
899       expressing mutant (P301L) Tau protein. *Nat Genet* **25**, 402-405 (2000).
- 900   4       Allen, B. *et al.* Abundant Tau filaments and nonapoptotic neurodegeneration in transgenic mice  
901       expressing human P301S Tau protein. *J Neurosci* **22**, 9340-9351 (2002).
- 902   5       Jucker, M. & Walker, L. C. Propagation and spread of pathogenic protein assemblies in  
903       neurodegenerative diseases. *Nat Neurosci* **21**, 1341-1349 (2018).
- 904   6       Vaquer-Alicea, J. & Diamond, M. I. Propagation of protein aggregation in neurodegenerative  
905       diseases. *Annual review of biochemistry* **88**, 785-810 (2019).
- 906   7       DeVos, S. L. *et al.* Tau reduction prevents neuronal loss and reverses pathological Tau deposition  
907       and seeding in mice with tauopathy. *Sci Transl Med* **9**, 374 (2017).
- 908   8       Polydoro, M. *et al.* Reversal of neurofibrillary tangles and Tau-associated phenotype in the  
909       rTgTauEC model of early Alzheimer's disease. *J Neurosci* **33**, 13300-13311 (2013).
- 910   9       Doyle, S. M., Genest, O. & Wickner, S. Protein rescue from aggregates by powerful molecular  
911       chaperone machines. *Nat Rev Mol Cell Biol* **14**, 617-629 (2013).
- 912   10      Mogk, A., Bukau, B. & Kampina, H. H. Cellular handling of protein aggregates by disaggregation  
913       machines. *Mol Cell* **69**, 214-226 (2018).
- 914   11      Nillegoda, N. B., Wentink, A. S. & Bukau, B. Protein disaggregation in multicellular organisms.  
915       *Trends Biochem Sci* **43**, 285-300 (2018).
- 916   12      Faust, O. *et al.* HSP40 proteins use class-specific regulation to drive HSP70 functional diversity.  
917       *Nature* **587**, 489-494 (2020).
- 918   13      Wentink, A. S. *et al.* Molecular dissection of amyloid disaggregation by human HSP70. *Nature*  
919       **587**, 483-488 (2020).
- 920   14      Shorter, J. The mammalian disaggregase machinery: Hsp110 synergizes with Hsp70 and Hsp40 to  
921       catalyze protein disaggregation and reactivation in a cell-free system. *PLoS One* **6**, e26319,  
922       (2011).
- 923   15      Nachman, E. *et al.* Disassembly of Tau fibrils by the human Hsp70 disaggregation machinery  
924       generates small seeding-competent species. *J Biol Chem* **295**, 9676-9690 (2020).
- 925   16      Schneider, M. M. *et al.* The Hsc70 disaggregation machinery removes monomer units directly  
926       from  $\alpha$ -synuclein fibril ends. *Nature Communications* **12**, 5999 (2021).
- 927   17      Gao, X. *et al.* Human Hsp70 disaggregase reverses Parkinson's-linked alpha-Synuclein amyloid  
928       fibrils. *Mol Cell* **59**, 781-793 (2015).
- 929   18      Bodnar, N. O. & Rapoport, T. A. Molecular mechanism of substrate processing by the Cdc48  
930       ATPase complex. *Cell* **169**, 722-735 (2017).
- 931   19      Ji, Z. *et al.* Translocation of polyubiquitinated protein substrates by the hexameric Cdc48  
932       ATPase. *Mol Cell*, **82**(3), 570-584 (2021).
- 933   20      Darwich, N. F. *et al.* Autosomal dominant VCP hypomorph mutation impairs disaggregation of  
934       PHF-tau. *Science*, eaay8826 (2020).
- 935   21      Kobayashi, T., Manno, A. & Kakizuka, A. Involvement of valosin-containing protein (VCP)/p97 in  
936       the formation and clearance of abnormal protein aggregates. *Genes Cells* **12**, 889-901 (2007).
- 937   22      Gwon, Y. *et al.* Ubiquitination of G3BP1 mediates stress granule disassembly in a context-specific  
938       manner. *Science* **372**, eabf6548 (2021).

- 939 23 Buchan, J. R., Kolaitis, R.-M., Taylor, J. P. & Parker, R. Eukaryotic stress granules are cleared by  
940 autophagy and Cdc48/VCP function. *Cell* **153**, 1461-1474 (2013).
- 941 24 van den Boom, J. & Meyer, H. VCP/p97-mediated unfolding as a principle in protein homeostasis  
942 and signaling. *Mol Cell* **69**, 182-194 (2018).
- 943 25 Olszewski, M. M., Williams, C., Dong, K. C. & Martin, A. The Cdc48 unfoldase prepares well-  
944 folded protein substrates for degradation by the 26S proteasome. *Communications Biology* **2**, 29  
945 (2019).
- 946 26 Meyer, H. & Wehl, C. C. The VCP/p97 system at a glance: connecting cellular function to disease  
947 pathogenesis. *Journal of Cell Science* **127**, 3877 (2014).
- 948 27 Johnson, J. O. *et al.* Exome sequencing reveals VCP mutations as a cause of familial ALS. *Neuron*  
949 **68**, 857-864 (2010).
- 950 28 Schroder, R. *et al.* Mutant valosin-containing protein causes a novel type of frontotemporal  
951 dementia. *Annals of neurology* **57**, 457-461 (2005).
- 952 29 Watts, G. D. *et al.* Inclusion body myopathy associated with Paget disease of bone and  
953 frontotemporal dementia is caused by mutant valosin-containing protein. *Nat Genet* **36**, 377-  
954 381 (2004).
- 955 30 Blythe, E. E., Olson, K. C., Chau, V. & Deshaies, R. J. Ubiquitin- and ATP-dependent unfoldase  
956 activity of P97/VCP\*NPLOC4\*UFD1L is enhanced by a mutation that causes multisystem  
957 proteinopathy. *Proc Natl Acad Sci U S A* **114**, E4380-E4388 (2017).
- 958 31 Manno, A., Noguchi, M., Fukushi, J., Motohashi, Y. & Kakizuka, A. Enhanced ATPase activities as  
959 a primary defect of mutant valosin-containing proteins that cause inclusion body myopathy  
960 associated with Paget disease of bone and frontotemporal dementia. *Genes Cells* **15**, 911-922  
961 (2010).
- 962 32 Blythe, E. E., Gates, S. N., Deshaies, R. J. & Martin, A. Multisystem Proteinopathy mutations in  
963 VCP/p97 increase NPLOC4-UFD1L binding and substrate processing. *Structure* **27**, 1820-1829  
964 (2019).
- 965 33 Ritz, D. *et al.* Endolysosomal sorting of ubiquitylated caveolin-1 is regulated by VCP and UBXD1  
966 and impaired by VCP disease mutations. *Nature Cell Biology* **13**, 1116-1123 (2011).
- 967 34 Tresse, E. *et al.* VCP/p97 is essential for maturation of ubiquitin-containing autophagosomes and  
968 this function is impaired by mutations that cause IBMPFD. *Autophagy* **6**, 217-227 (2010).
- 969 35 Barghorn, S., Davies, P. & Mandelkow, E. Tau paired helical filaments from Alzheimer's disease  
970 brain and assembled in vitro are based on beta-structure in the core domain. *Biochemistry* **43**,  
971 1694-1703 (2004).
- 972 36 Crowther, T., Goedert, M. & Wischik, C. M. The repeat region of microtubule-associated protein  
973 Tau forms part of the core of the paired helical filament of Alzheimer's disease. *Ann Med* **21**,  
974 127-132 (1989).
- 975 37 Sanders, D. W. *et al.* Distinct Tau prion strains propagate in cells and mice and define different  
976 tauopathies. *Neuron* **82**, 1271-1288 (2014).
- 977 38 Frost, B., Ollesch, J., Wille, H. & Diamond, M. I. Conformational diversity of wild-type Tau fibrils  
978 specified by templated conformation change. *J Biol Chem* **284**, 3546-3551 (2009).
- 979 39 Schmued, L. *et al.* Introducing Amylo-Glo, a novel fluorescent amyloid specific histochemical  
980 tracer especially suited for multiple labeling and large scale quantification studies. *Journal of*  
981 *Neuroscience Methods* **209**, 120-126 (2012).
- 982 40 Falcon, B. *et al.* Structures of filaments from Pick's disease reveal a novel Tau protein fold.  
983 *Nature* **561**, 137-140 (2018).
- 984 41 Falcon, B. *et al.* Novel Tau filament fold in chronic traumatic encephalopathy encloses  
985 hydrophobic molecules. *Nature* **568**, 420-423 (2019).

- 986 42 Fitzpatrick, A. W. P. *et al.* Cryo-EM structures of Tau filaments from Alzheimer's disease. *Nature*  
987 **547**, 185-190 (2017).
- 988 43 Spillantini, M. G. *et al.* Familial multiple system tauopathy with presenile dementia: a disease  
989 with abundant neuronal and glial Tau filaments. *Proc Natl Acad Sci U S A* **94**, 4113-4118 (1997).
- 990 44 Zhang, W. *et al.* Novel Tau filament fold in corticobasal degeneration. *Nature* **580**, 283-287  
991 (2020).
- 992 45 Braak, H., Thal, D. R., Ghebremedhin, E. & Del Tredici, K. Stages of the pathologic process in  
993 Alzheimer disease: age categories from 1 to 100 years. *J Neuropathol Exp Neurol* **70**, 960-969  
994 (2011).
- 995 46 Goedert, M., Jakes, R. & Vanmechelen, E. Monoclonal antibody AT8 recognises Tau protein  
996 phosphorylated at both serine 202 and threonine 205. *Neurosci Lett* **189**, 167-169 (1995).
- 997 47 Petrucelli, L. *et al.* CHIP and Hsp70 regulate Tau ubiquitination, degradation and aggregation.  
998 *Human Molecular Genetics* **13**, 703-714 (2004).
- 999 48 Hyun, D. H., Lee, M., Halliwell, B. & Jenner, P. Proteasomal inhibition causes the formation of  
1000 protein aggregates containing a wide range of proteins, including nitrated proteins. *Journal of*  
1001 *neurochemistry* **86**, 363-373 (2003).
- 1002 49 Hjerpe, R. *et al.* UBQLN2 mediates autophagy-independent protein aggregate clearance by the  
1003 proteasome. *Cell* **166**, 935-949 (2016).
- 1004 50 Twomey, E. C. *et al.* Substrate processing by the Cdc48 ATPase complex is initiated by ubiquitin  
1005 unfolding. *Science* **365**, eaax1033 (2019).
- 1006 51 Magnaghi, P. *et al.* Covalent and allosteric inhibitors of the ATPase VCP/p97 induce cancer cell  
1007 death. *Nat Chem Biol* **9**, 548-556 (2013).
- 1008 52 Zhou, H.-J. *et al.* Discovery of a first-in-class, potent, selective, and orally bioavailable inhibitor of  
1009 the p97 AAA ATPase (CB-5083). *Journal of Medicinal Chemistry* **58**, 9480-9497 (2015).
- 1010 53 B auerlein, F. J. B. *et al.* In situ architecture and cellular interactions of polyQ inclusions. *Cell* **171**,  
1011 179-187 (2017).
- 1012 54 Trinkaus, V. A. *et al.* In situ architecture of neuronal  $\alpha$ -Synuclein inclusions. *Nat Commun* **12**,  
1013 2110 (2021).
- 1014 55 Hyer, M. L. *et al.* A small-molecule inhibitor of the ubiquitin activating enzyme for cancer  
1015 treatment. *Nat Med* **24**, 186-193 (2018).
- 1016 56 Gupta, R. *et al.* Firefly luciferase mutants as sensors of proteome stress. *Nat Methods* **8**, 879-884  
1017 (2011).
- 1018 57 Schlecht, R. *et al.* Functional analysis of Hsp70 inhibitors. *PLoS One* **8**, e78443-e78443 (2013).
- 1019 58 Forman, M. S. *et al.* Novel ubiquitin neuropathology in frontotemporal dementia with valosin-  
1020 containing protein gene mutations. *J Neuropathol Exp Neurol* **65**, 571-581 (2006).
- 1021 59 Weihl, C. C., Dalal, S., Pestronk, A. & Hanson, P. I. Inclusion body myopathy-associated  
1022 mutations in p97/VCP impair endoplasmic reticulum-associated degradation. *Human Molecular*  
1023 *Genetics* **15**, 189-199 (2005).
- 1024 60 Dalal, S., Rosser, M. F., Cyr, D. M. & Hanson, P. I. Distinct roles for the AAA ATPases NSF and p97  
1025 in the secretory pathway. *Mol Biol Cell* **15**, 637-648 (2004).
- 1026 61 Zhu, J. *et al.* VCP protects neurons from proteopathic seeding. *BioRxiv*,  
1027 [doi.org/10.1101/2021.07.12.452081](https://doi.org/10.1101/2021.07.12.452081) (2021).
- 1028 62 Yuste-Checa, P. *et al.* The extracellular chaperone Clusterin enhances Tau aggregate seeding in a  
1029 cellular model. *Nature Communications* **12**, 4863 (2021).
- 1030 63 Erives, A. J. & Fassler, J. S. Metabolic and chaperone gene loss marks the origin of animals:  
1031 evidence for Hsp104 and Hsp78 chaperones sharing mitochondrial enzymes as clients. *PLoS One*  
1032 **10**, e0117192-e0117192 (2015).

1033 64 Sontag, E. M., Samant, R. S. & Frydman, J. Mechanisms and functions of spatial protein quality  
1034 control. *Annual review of biochemistry* **86**, 97-122 (2017).

1035 65 Cliffe, R. *et al.* Filamentous aggregates are fragmented by the proteasome holoenzyme. *Cell Rep*  
1036 **26**, 2140-2149 (2019).

1037 66 Higashiyama, H. *et al.* Identification of ter94, Drosophila VCP, as a modulator of polyglutamine-  
1038 induced neurodegeneration. *Cell Death Differ* **9**, 264-273 (2002).

1039 67 Khosravi, B. *et al.* Cell-to-cell transmission of C9orf72 poly-(Gly-Ala) triggers key features of  
1040 ALS/FTD. *EMBO J* **39**, e102811 (2020).

1041 68 Jackrel, M. E. *et al.* Potentiated Hsp104 variants antagonize diverse proteotoxic misfolding  
1042 events. *Cell* **156**, 170-182 (2014).

1043 69 Shorter, J. Engineering therapeutic protein disaggregases. *Mol Biol Cell* **27**, 1556-1560 (2016).

1044 70 VerPlank, J. J. S., Tyrkalska, S. D., Fleming, A., Rubinsztein, D. C. & Goldberg, A. L. cGMP via PKG  
1045 activates 26S proteasomes and enhances degradation of proteins, including ones that cause  
1046 neurodegenerative diseases. *Proc Natl Acad Sci U S A* **117**, 14220-14230 (2020).

1047 71 Gu, X. *et al.* SAMTOR is an S-adenosylmethionine sensor for the mTORC1 pathway. *Science* **358**,  
1048 813-818 (2017).

1049 72 Schmittgen, T. D. & Livak, K. J. Analyzing real-time PCR data by the comparative C(T) method.  
1050 *Nat Protoc* **3**, 1101-1108 (2008).

1051 73 Guo, Q. *et al.* In situ structure of neuronal C9orf72 poly-GA aggregates reveals proteasome  
1052 recruitment. *Cell* **172**, 696-705 (2018).

1053 74 Rigort, A. *et al.* Focused ion beam micromachining of eukaryotic cells for cryoelectron  
1054 tomography. *Proc Natl Acad Sci U S A* **109**, 4449-4454 (2012).

1055 75 Mastronarde, D. N. Automated electron microscope tomography using robust prediction of  
1056 specimen movements. *J Struct Biol* **152**, 36-51 (2005).

1057 76 Fukuda, Y., Laugks, U., Lučić, V., Baumeister, W. & Danev, R. Electron cryotomography of  
1058 vitrified cells with a Volta phase plate. *J Struct Biol* **190**, 143-154 (2015).

1059 77 Li, X. *et al.* Electron counting and beam-induced motion correction enable near-atomic-  
1060 resolution single-particle cryo-EM. *Nat Methods* **10**, 584-590 (2013).

1061 78 Kremer, J. R., Mastronarde, D. N. & McIntosh, J. R. Computer visualization of three-dimensional  
1062 image data using IMOD. *J Struct Biol* **116**, 71-76 (1996).

1063 79 Rigort, A. *et al.* Automated segmentation of electron tomograms for a quantitative description  
1064 of actin filament networks. *J Struct Biol* **177**, 135-144 (2012).

1065 80 Martinez-Sanchez, A., Garcia, I., Asano, S., Lucic, V. & Fernandez, J. J. Robust membrane  
1066 detection based on tensor voting for electron tomography. *J Struct Biol* **186**, 49-61 (2014).

1067 81 Ong, S. E. *et al.* Stable isotope labeling by amino acids in cell culture, SILAC, as a simple and  
1068 accurate approach to expression proteomics. *Mol Cell Proteomics* **1**, 376-386 (2002).

1069 82 Wiśniewski, J. R., Zielinska, D. F. & Mann, M. Comparison of ultrafiltration units for proteomic  
1070 and N-glycoproteomic analysis by the filter-aided sample preparation method. *Anal Biochem*  
1071 **410**, 307-309 (2011).

1072 83 Banning, C. *et al.* A flow cytometry-based FRET assay to identify and analyse protein-protein  
1073 interactions in living cells. *PLoS One* **5**, e9344 (2010).

1074 84 Perez-Riverol, Y. *et al.* The PRIDE database and related tools and resources in 2019: improving  
1075 support for quantification data. *Nucleic Acids Res* **47**, D442-d450 (2019).

1076  
1077

1078 **Acknowledgements**

1079 We thank Ralf Zenke, Markus Oster, Giovanni Cardone and Martin Spitaler from the MPIB  
1080 Imaging Facility for assistance with confocal microscopy, image analysis and flow cytometry,  
1081 and Albert Ries for assistance with mass spectrometry. We acknowledge Gopal Jayaraj for  
1082 generation of the Fluc-GFP cell line and Alonso Izzat Carvajal Alvarez for help with native  
1083 PAGE analysis. The research leading to these results has received funding from the European  
1084 Commission under Grant FP7 GA ERC- 2012-SyG\_318987–ToPAG (I.S., R.K., P.Y.-C., I.D.,  
1085 R.F.-B., F.U.H. and M.S.H.), Marie Skłodowska-Curie grant (agreement no. 749370) (S.G.), the  
1086 Deutsche Forschungsgemeinschaft (DFG, German Research Foundation) under Germany’s  
1087 Excellence Strategy within the framework of the Munich Cluster for Systems Neurology (EXC  
1088 2145 SyNergy – ID 390857198) (V.A.T., F.U.H. and M.S.H.) and MBExC (EXC 2067/1 — ID  
1089 390729940) (R.F.-B.), as well as by the joint efforts of The Michael J. Fox Foundation for  
1090 Parkinson’s Research (MJFF) and the Aligning Science Across Parkinson’s (ASAP) initiative.  
1091 MJFF administers the grant ASAP-000282 on behalf of ASAP and itself. M.S.H. acknowledges  
1092 the funding from Alzheimer Nederland (Grant Number WE.03-2020-12).

1093 **Author contributions**

1094 I.S. designed and performed most experiments. P.Y. performed seeding experiments. M.D.P.  
1095 performed neuronal cultures. Q.G. and V.A.T. carried out cryo-electron tomography of Tau  
1096 aggregates in TauRD-Y\* cells and primary neurons, respectively. R.K. performed mass  
1097 spectrometry analysis. S.G. helped with initial experiments and quantified inclusion size. H.H.  
1098 performed mRNA analysis. I.D. supervised experiments with neuronal cultures. R.F.B. and W.B.  
1099 supervised cryo-electron tomography experiments. D.W.S. and M.I.D. provided cell lines,

1100 protocols and contributed to the interactome analysis. F.U.H. and M.S.H. initiated and  
1101 supervised the project and wrote the manuscript with input from I.S. and the other authors.

1102

1103 **Competing interests**

1104 Authors declare no competing interests.

1105

1106
