# Supplementary material for: The AAA+ chaperone VCP disaggregates Tau fibrils and generates aggregate seeds
Source: bioRxiv or medRxiv preprint supplement (doi:10.1101/2022.02.18.481043), 2022-02-19
Supplement: Supplementary file [file media-1.pdf]

1 **Supplementary Information**

2

3 **The AAA+ chaperone VCP disaggregates Tau fibrils and generates**  
4 **aggregate seeds**

5 Itika Saha<sup>1,2</sup>, Patricia Yuste-Checa<sup>1,2</sup>, Miguel Da Silva Padilha<sup>3,4</sup>, Qiang Guo<sup>5,#</sup>, Roman Körner<sup>1</sup>,  
6 Hauke Holthusen<sup>1</sup>, Victoria A. Trinkaus<sup>1,5,6</sup>, Irina Dudanova<sup>3,4</sup>, Rubén Fernández-  
7 Busnadiego<sup>2,5,7,8</sup>, Wolfgang Baumeister<sup>5</sup>, David W. Sanders<sup>9,‡</sup>, Saurabh Gautam<sup>1,§</sup>,  
8 Marc I. Diamond<sup>9</sup>, F. Ulrich Hartl<sup>1,2,6,\*</sup> and Mark S. Hipp<sup>1,6,10,11\*</sup>

9

10 <sup>1</sup>Department of Cellular Biochemistry, Max Planck Institute of Biochemistry, Am Klopferspitz  
11 18, 82152 Martinsried, Germany.

12 <sup>2</sup>Aligning Science Across Parkinson's (ASAP) Collaborative Research Network, Chevy Chase,  
13 MD, USA.

14 <sup>3</sup>Molecular Neurodegeneration Group, Max Planck Institute of Neurobiology,  
15 82152 Martinsried, Germany.

16 <sup>4</sup>Department of Molecules – Signaling – Development, Max Planck Institute of Neurobiology,  
17 Am Klopferspitz 18, 82152 Martinsried, Germany.

18 <sup>5</sup>Department of Structural Molecular Biology, Max Planck Institute of Biochemistry, Am  
19 Klopferspitz 18, 82152 Martinsried, Germany.

20 <sup>6</sup>Munich Cluster for Systems Neurology (SyNergy), Munich, Germany.

21 <sup>7</sup>Institute of Neuropathology, University Medical Center Göttingen, 37099 Göttingen, Germany.

22 <sup>8</sup>Cluster of Excellence “Multiscale Bioimaging: from Molecular Machines to Networks of  
23 Excitable Cells” (MBExC), University of Göttingen, Germany.

24 <sup>9</sup>Center for Alzheimer's and Neurodegenerative Diseases, Peter O'Donnell Jr. Brain Institute,  
25 University of Texas Southwestern Medical Center, Dallas, 75390 Texas, USA.

26 <sup>10</sup>School of Medicine and Health Sciences, Carl von Ossietzky University Oldenburg,  
27 Oldenburg, Germany.

28 <sup>11</sup>Department of Biomedical Sciences of Cells and Systems, University Medical Center  
29 Groningen, University of Groningen, Antonius Deusinglaan, 1, 9713 AV Groningen, The  
30 Netherlands.

31 # Present address: State Key Laboratory of Protein and Plant Gene Research, School of Life  
32 Sciences and Peking-Tsinghua Center for Life Sciences, Peking University, Beijing 100871,  
33 China.

34 ‡ Present address: Department of Chemical and Biological Engineering, Princeton University,  
35 Princeton, NJ 08544, USA

36 § Present address: Boehringer Ingelheim International GmbH, 55216 Ingelheim, Germany and  
37 ViraTherapeutics GmbH, 6063 Rum, Austria.

38

39 \*Correspondence to [uhartl@biochem.mpg.de](mailto:uhartl@biochem.mpg.de) and [m.s.hipp@umcg.nl](mailto:m.s.hipp@umcg.nl)

40

41 Supplementary information includes 10 Supplementary Figures and 1 Table

42

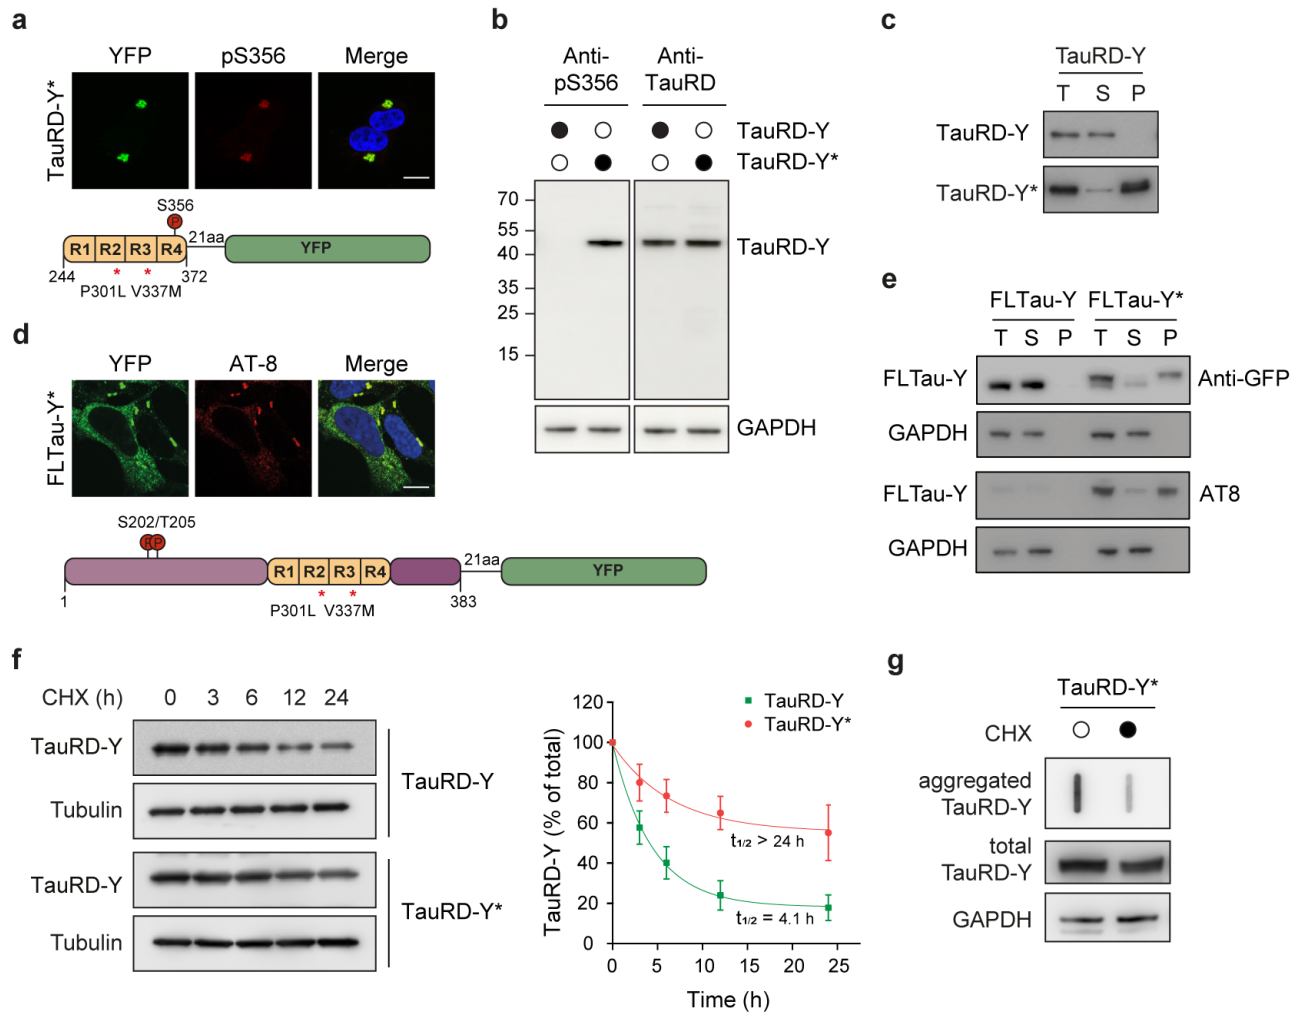

43

44 **Supplementary Fig. 1: Tau aggregation and clearance in a constitutive expression model.**

45 **a** Immunofluorescence staining of TauRD-Y\* cells with an antibody against Tau  
 46 phosphorylation at S356 (red) and YFP fluorescence of TauRD-Y (green). Scale bar, 10  $\mu$ m.  
 47 **b** Analysis of Tau S356 phosphorylation in lysates of TauRD-Y and TauRD-Y\* cells by  
 48 immunoblotting. Total TauRD-Y was detected using antibody against TauRD. **c** Solubility of  
 49 TauRD-Y in TauRD-Y and TauRD-Y\* cells at steady state, determined by fractionation of cell  
 50 lysate by centrifugation, followed by immunoblotting with anti-GFP antibody. T, total cell  
 51 lysate, S, supernatant, P, pellet. **d** Immunofluorescence staining of full-length Tau (FLTau-Y) in  
 52 aggregate-containing FLTau-Y\* cells with AT-8 antibody specific for Tau phosphorylation at  
 53 S202/T205 (red) and YFP fluorescence of TauRD-Y (green). Scale bar, 10  $\mu$ m. **e** Solubility of  
 54 phosphorylated FLTau-Y in FLTau-Y and FLTau-Y\* cells at steady state analyzed as in (c).  
 55 Immunoblotting was with AT-8 antibody (bottom) and anti-GFP (top). GAPDH served as  
 56 loading control. **f** Turnover of TauRD-Y in TauRD-Y and TauRD-Y\* cells upon cycloheximide  
 57 (CHX) shut-off (CHX; 50  $\mu$ g/mL). Left, anti-GFP immunoblots to determine TauRD-Y levels.  
 58 Tubulin served as loading control. Right, exponential fits of CHX chase data and corresponding  
 59 half-lives ( $t_{1/2}$ ). Mean  $\pm$  s.d.; n=3. **g** Filter trap analysis of aggregated TauRD-Y upon CHX chase  
 60 for 24 h. Aggregated and total TauRD-Y levels were determined by anti-GFP immunoblotting.  
 61 GAPDH served as loading control.

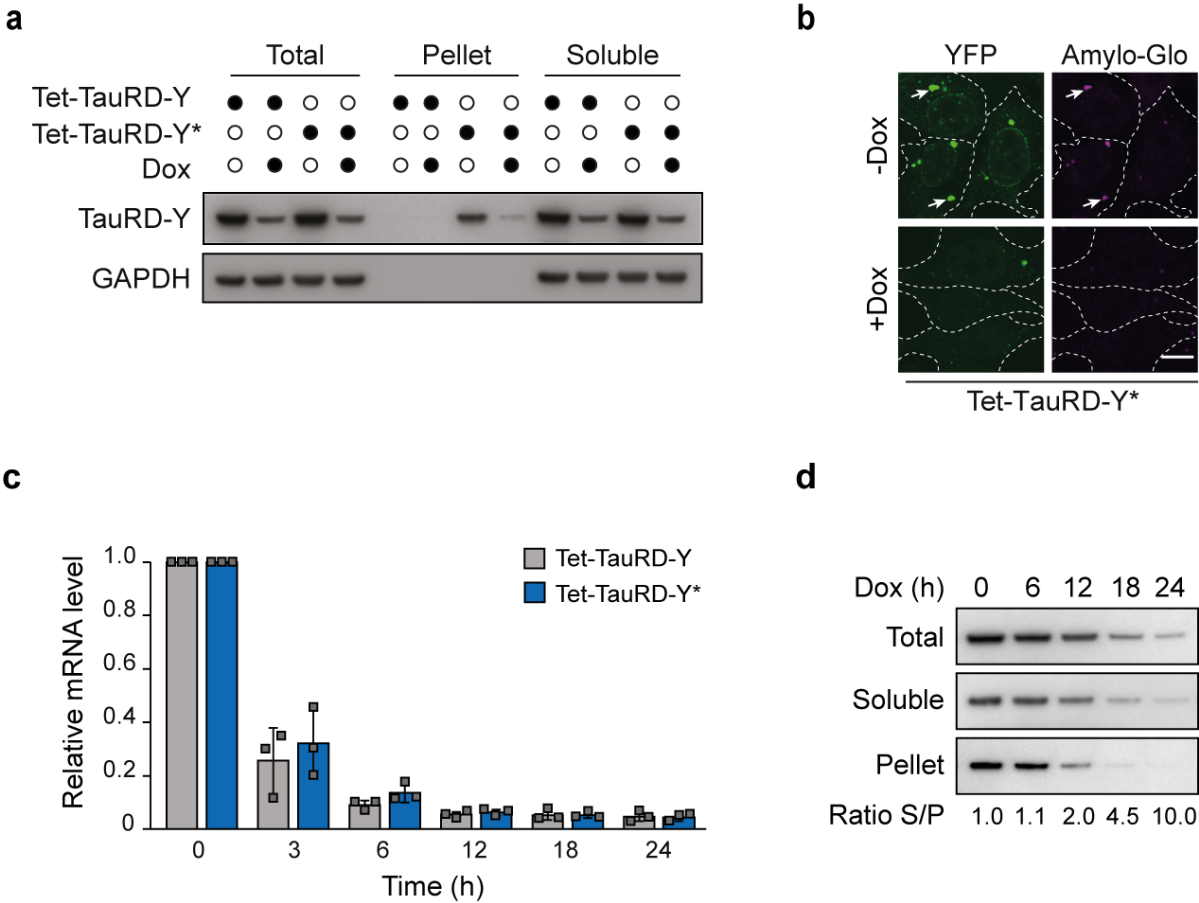

62

63 **Supplementary Fig. 2: TauRD-Y aggregation and clearance upon inhibition of expression**  
 64 **in a Tet-regulated TauRD-Y expression system.**

65 **a** Solubility of TauRD-Y in Tet-TauRD-Y and Tet-TauRD-Y\* cells upon addition of 50 ng/mL  
 66 doxycycline (Dox) for 24 h. Cell lysates were fractionated as in Supplementary Fig. 1c. TauRD-  
 67 Y was detected with anti-GFP antibody. GAPDH served as loading control. **b** Representative  
 68 fluorescence images of Tet-TauRD-Y\* cells treated with Dox for 24 h showing staining of  
 69 TauRD-Y inclusions (green) with Amylo-Glo (magenta). White dashed lines indicate cell  
 70 boundaries. Scale bar, 10  $\mu$ m. **c** Quantitative PCR analysis of TauRD-Y mRNA in Tet-TauRD-Y  
 71 and Tet-TauRD-Y\* cells treated with Dox for 0, 3, 6, 12, 18 and 24 h. mRNA levels were  
 72 normalized to the reference gene *RPS18*. Mean  $\pm$  s.d.; n=3. **d** Solubility of TauRD-Y in Tet-  
 73 TauRD-Y\* cells upon addition of Dox for the indicated times. Normalized ratios of TauRD-Y in  
 74 soluble (S) and pellet (P) fractions are stated.

75

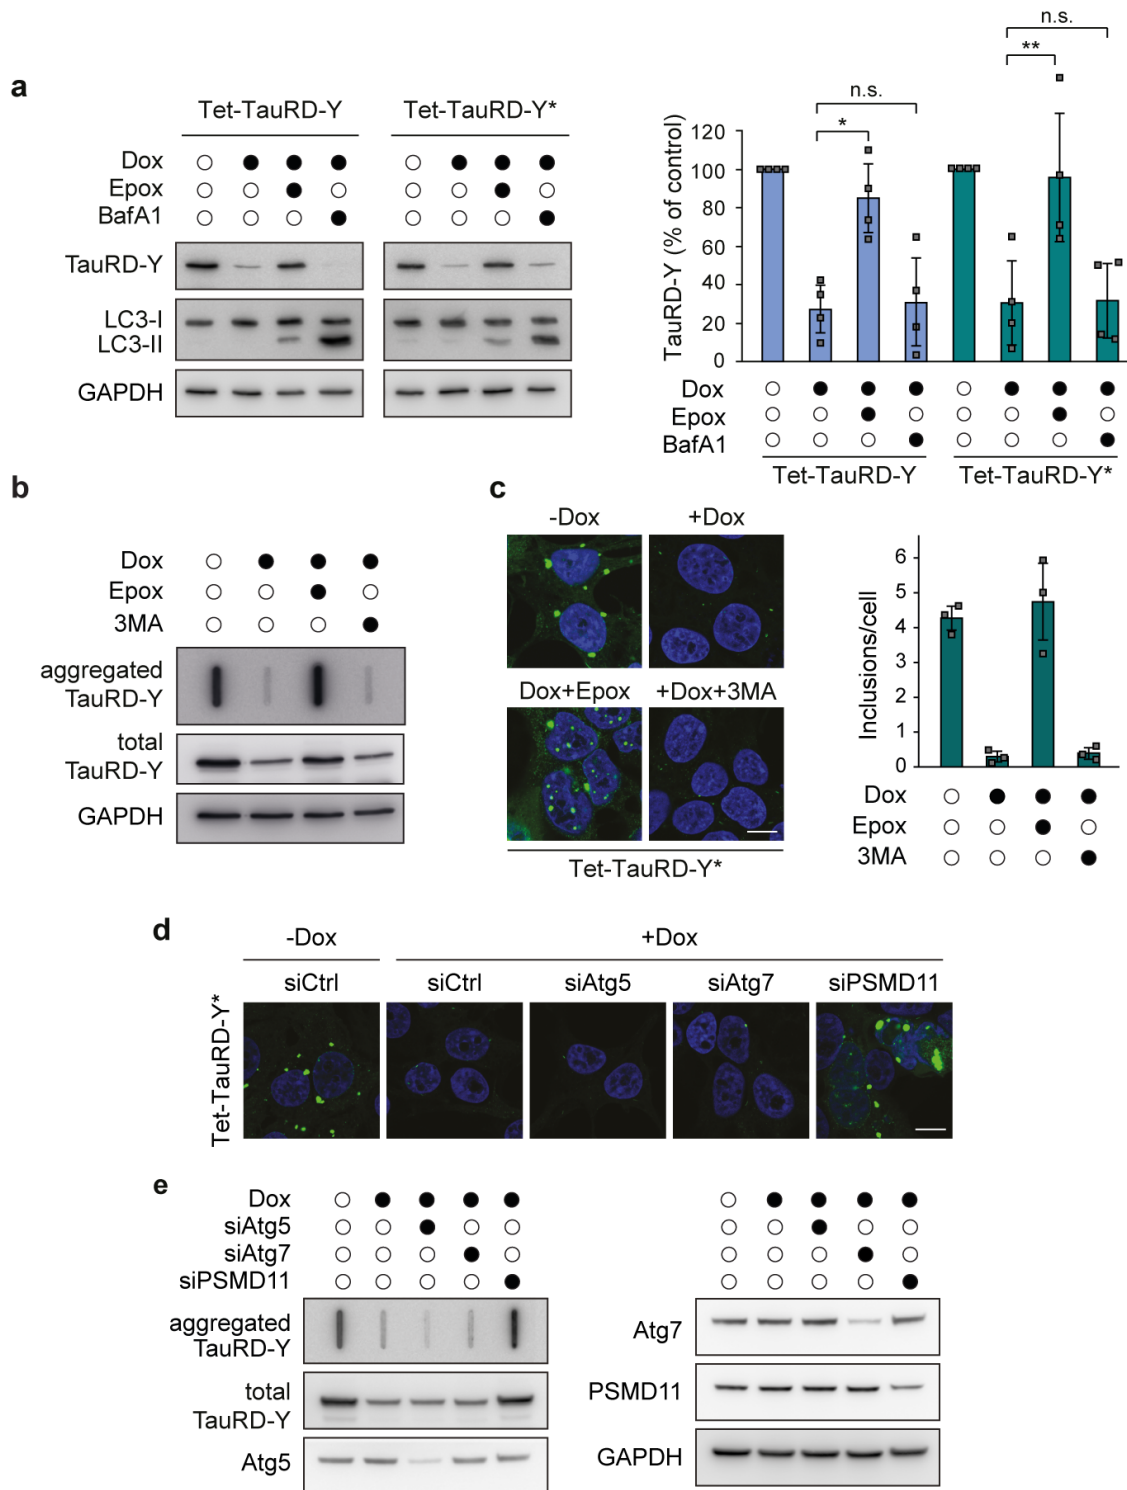

76  
77

78 **Supplementary Fig. 3: Effect of UPS and autophagy inhibition on TauRD-Y levels and**  
79 **aggregate clearance.**

80 **a** Analysis of TauRD-Y levels in Tet-TauRD-Y and Tet-TauRD-Y\* cells treated for 24 h with  
81 doxycycline (Dox; 50 ng/mL) alone or in combination with Epoxomicin (Epox; 50 nM) or

82 Bafilomycin A1 (BafA1; 50 nM). TauRD-Y and LC3 levels were determined by immunoblotting  
83 against GFP and LC3B respectively. GAPDH served as loading control. Mean  $\pm$  s.d.; n=4.  
84 \*p<0.05 (Tet-TauRD-Y: + Dox vs + Dox + Epox, p=0.0114), \*\*p<0.01 (Tet-TauRD-Y\*: + Dox  
85 vs + Dox + Epox, p=0.0026); n.s. non-significant (Tet-TauRD-Y: + Dox vs + Dox + Epox, p=  
86 0.6422; Tet-TauRD-Y\*: + Dox vs + Dox + Epox, p= 0.8799) from two-tailed Student's paired t-  
87 test. **b** Filter trap analysis of Tet-TauRD-Y\* cells treated for 24 h with Dox alone or in  
88 combination with Epoxomicin (Epox; 50 nM) or 3-methyladenine (3MA; 5 mM). Aggregated  
89 and total TauRD-Y was detected with anti-GFP antibody. **c** Left, representative images of Tet-  
90 TauRD-Y\* cells treated for 24 h with Dox alone or, in combination with Epoxomicin (Epox;  
91 50 nM) or 3MA (5 mM). Scale bar, 10  $\mu$ m. Right, quantification of TauRD-Y foci. 100-200 cells  
92 analyzed per experiment. Mean  $\pm$  s.d.; n=3. **d** Representative images of Tet-TauRD-Y\* cells  
93 transfected with non-targeted (Ctrl) siRNA or siRNA against Atg5 (50 nM), Atg7 (50 nM) and  
94 PSMD11 (25 nM). 72 h after transfection, doxycycline (Dox; 50 ng/mL) was added for another  
95 24 h where indicated. Scale bar, 10  $\mu$ m. **e** Filter trap analysis of Tet-TauRD-Y\* cells transfected  
96 with siRNAs and treated with Dox as stated in (d). TauRD-Y was detected by immunoblotting  
97 with anti-GFP antibody.

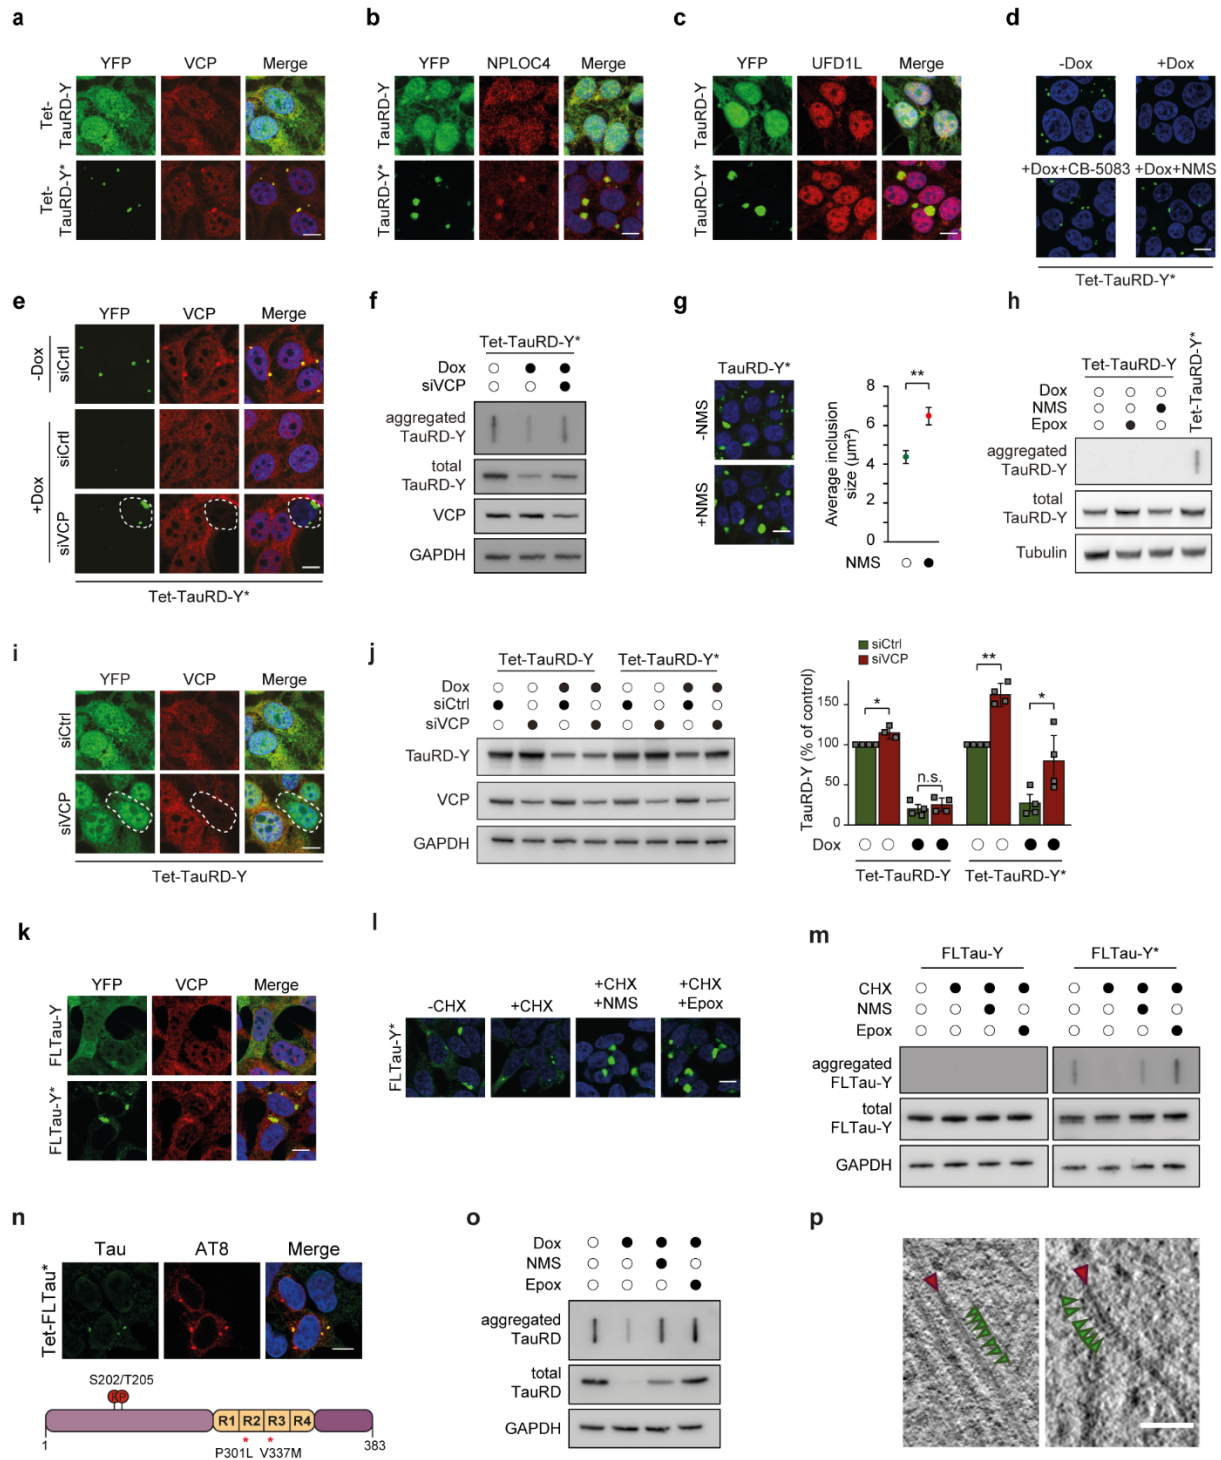

98

99 **Supplementary Fig. 4: Aggregation specific stabilization of Tau by VCP inactivation.**

100 **a** Immunofluorescence staining of VCP (red) and YFP fluorescence of TauRD-Y (green) in Tet-  
 101 TauRD-Y and Tet-TauRD-Y\* cells. **b** and **c** Immunofluorescence staining of NPLOC4 (**b**) (red)  
 102 and UFD1L (**c**) (red) in TauRD-Y and TauRD-Y\* cells. Scale bars, 10 μm. **d** Representative  
 103 images of Tet-TauRD-Y\* cells treated for 24 h with doxycycline (Dox; 50 ng/mL) alone or in

104 combination with CB-5083 (1  $\mu$ M) or NMS-873 (NMS; 2.5  $\mu$ M). Scale bar, 10  $\mu$ m.  
105 **e** Immunofluorescence staining of VCP (red) in Tet-TauRD-Y\* cells treated with non-targeted  
106 (Ctrl) or VCP siRNA for 96 h. Doxycycline (Dox; 50 ng/mL) was added for the last 24 h.  
107 Dashed lines indicate a cell with reduced VCP levels. Scale bar, 10  $\mu$ m. **f** Filter trap analysis of  
108 aggregated TauRD-Y in Tet-TauRD-Y\* lysates treated as in (d). Aggregated and total TauRD-Y  
109 was analyzed by anti-GFP immunoblotting. GAPDH served as loading control. **g** Size increase  
110 of TauRD-Y inclusions upon VCP inhibition. Representative images of TauRD-Y\* cells treated  
111 for 24 h with NMS-873 (NMS; 5  $\mu$ M) and quantification of average inclusion size ( $\mu$ m<sup>2</sup>). 200-  
112 400 cells analyzed per experiment. Mean  $\pm$  s.d.; n=5. \*\*p<0.01 (p= 0.0022) from two-tailed  
113 Student's paired t-test. **h** Filter trap analysis of Tet-TauRD-Y cells treated for 24 h with  
114 Epoxomicin (Epo; 50 nM) or NMS-873 (NMS; 2.5  $\mu$ M) where indicated. Tet-TauRD-Y\* lysate  
115 was used as control. TauRD-Y was detected by immunoblotting with anti-GFP antibody.  
116 **i** Immunofluorescence staining of VCP (red) and YFP fluorescence of TauRD-Y (green) in Tet-  
117 TauRD-Y cells transfected with non-targeted (Ctrl) or VCP siRNA for 96 h. Dashed lines  
118 indicate a cell with reduced VCP levels. Scale bar, 10  $\mu$ m. **j** Left, analysis of TauRD-Y level in  
119 Tet-TauRD-Y and Tet-TauRD-Y\* cells transfected for 96 h with non-targeted (Ctrl) or VCP  
120 siRNA where indicated. Doxycycline (Dox; 50 ng/mL) was added for the last 24 h. TauRD-Y  
121 was detected by immunoblotting with anti-GFP antibody. Right, quantification of TauRD-Y  
122 immunoblot. Mean  $\pm$  s.d.; n=4. \*p<0.05 (Tet-TauRD-Y - Dox: siCtrl vs siVCP, p= 0.0218; Tet-  
123 TauRD-Y\* + Dox: siCtrl vs siVCP, p= 0.0156); \*\*p<0.01 (Tet-TauRD-Y\* - Dox: siCtrl vs  
124 siVCP, p= 0.0023); n.s. non-significant (Tet-TauRD-Y + Dox: siCtrl vs siVCP, p= 0.0539) from  
125 two-tailed paired Student's t-test. **k** Immunofluorescence staining of VCP (red) and YFP  
126 fluorescence of FLTau-Y (green) in FLTau-Y and FLTau-Y\* cells. Scale bar, 10  $\mu$ m.  
127 **l** Representative images of FLTau-Y\* cells treated for 24 h with cycloheximide (CHX; 50  
128  $\mu$ g/mL) alone or in combination with NMS-873 (NMS; 2.5  $\mu$ M) or Epoxomicin (Epo; 100 nM).  
129 Scale bar, 10  $\mu$ m. **m** Filter trap analysis of lysates from FLTau-Y and FLTau-Y\* cells treated for  
130 24 h with Dox alone or in combination with NMS-873 (NMS; 2.5  $\mu$ M) or Epoxomicin (Epo;  
131 50 nM). Aggregated and total FLTau-Y levels were determined by immunoblotting against GFP.  
132 GAPDH served as loading control. **n** Immunofluorescence staining of full-length Tau (FLTau) in  
133 aggregate-containing Tet-FLTau\* cells with Tau (green) and Tau S202/T205 phosphorylation  
134 specific AT-8 (red) antibody. Scale bar, 10  $\mu$ m. **o** Filter trap analysis of lysates from Tet-  
135 TauRD\* cells treated for 24 h with Dox alone or in combination with NMS-873 (NMS; 2.5  $\mu$ M)  
136 or Epoxomicin (Epo; 50 nM). Aggregated and total TauRD levels were determined by  
137 immunoblotting against myc and TauRD, respectively. GAPDH served as loading control.  
138 **p** Examples of two TauRD-Y fibrils from a representative 1.4 nm thick tomographic slice of a  
139 TauRD inclusion from neurons. Red arrows indicate TauRD-Y fibrils and green arrows indicate  
140 globular densities along fibrils. Scale bar, 40 nm.  
141



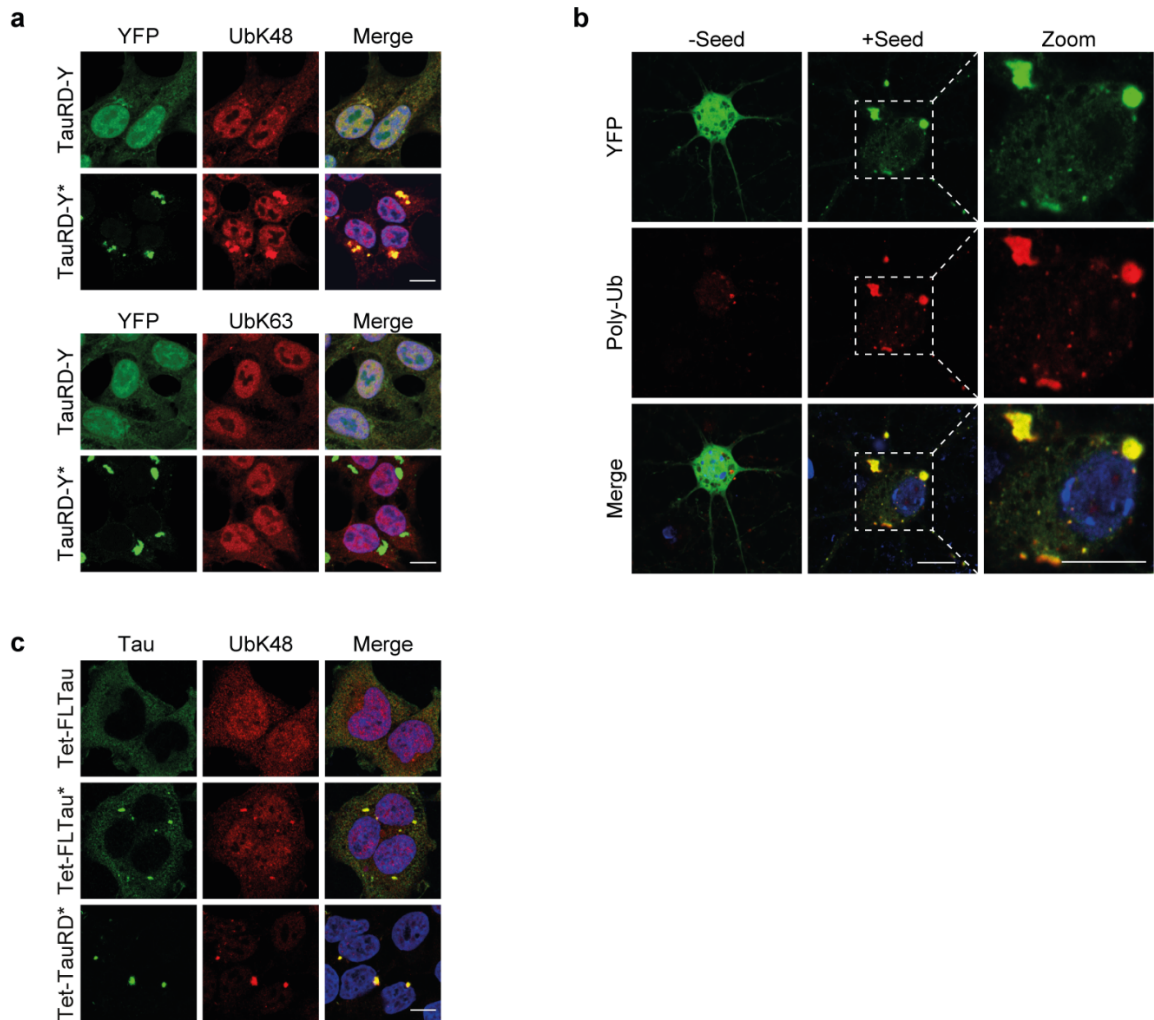

142

143 **Supplementary Fig. 5: Ubiquitylation of TauRD-Y aggregates.**

144 **a** Immunofluorescence staining of (top) ubiquitin-K48 (UbK48) (red) and (bottom) ubiquitin  
 145 K63 (UbK63) (red) chains and YFP fluorescence of TauRD-Y (green) in TauRD-Y and TauRD-  
 146 Y\* cells. Scale bars, 10  $\mu$ m. **b** Immunofluorescence staining of ubiquitylated proteins (FK2  
 147 antibody) (red) in primary neurons expressing TauRD-Y (green) and treated with TauRD  
 148 containing lysates (+Seed) where indicated. Scale bars, 20  $\mu$ m. **c** Immunofluorescence staining  
 149 of ubiquitin-K48 (UbK48) (red) chains and Tau (green) in Tet-FLTau, Tet-FLTau\* and Tet-  
 150 TauRD\* cells. FLTau was detected using Tau-5 and TauRD using anti-myc antibody. Scale bar,  
 151 10  $\mu$ m.

152

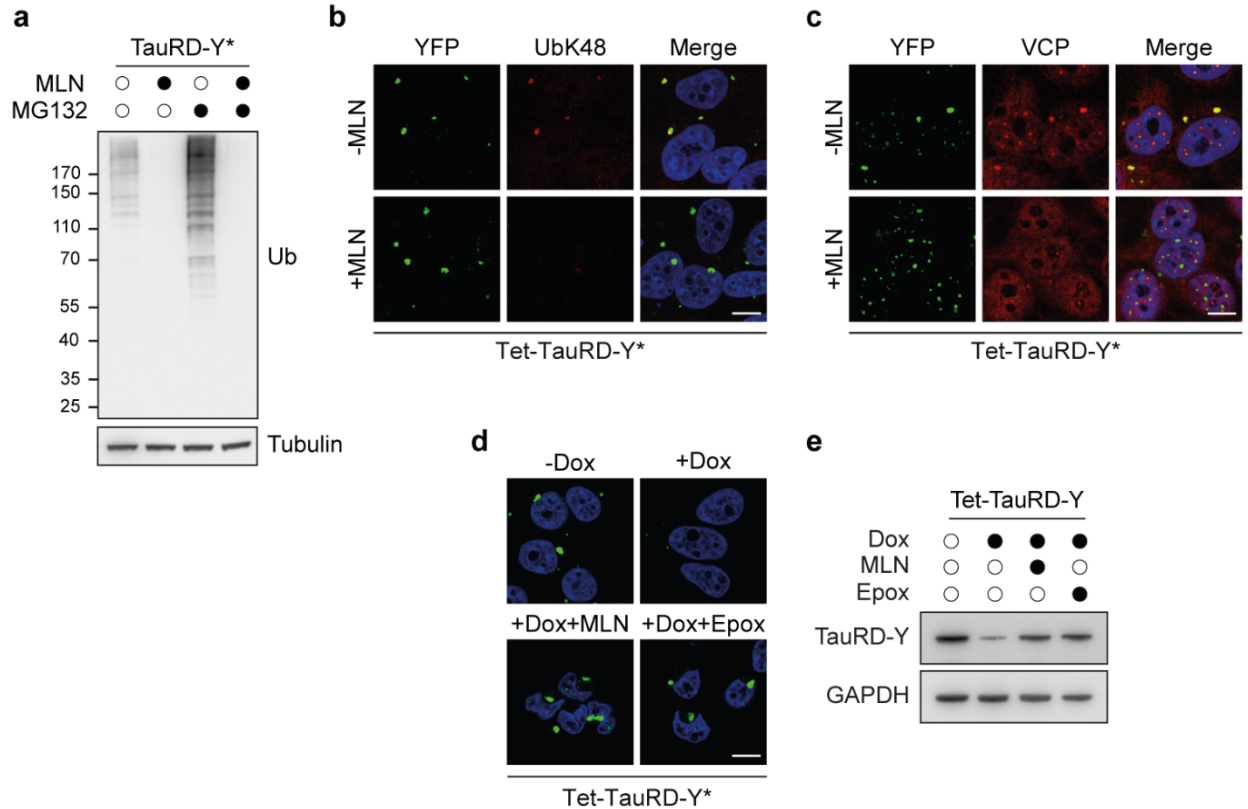

153

154 **Supplementary Fig. 6: Role of ubiquitylation in TauRD-Y disaggregation.**

155 **a** Analysis of ubiquitylated protein levels in lysates of TauRD-Y\* cells treated with the ubiquitin  
 156 activating enzyme E1 inhibitor MLN7243 (MLN; 0.5  $\mu$ M) alone or in combination with  
 157 proteasome inhibitor MG132 (1  $\mu$ M) for 14 h. Ubiquitylated proteins were detected by  
 158 immunoblotting against ubiquitin. Tubulin served as loading control. **b** Immunofluorescence  
 159 staining of ubiquitin-K48 chains (UbK48) (red) and **c** VCP (red) in Tet-TauRD-Y\* cells treated  
 160 with MLN7243 (MLN; 0.5  $\mu$ M) for 12 h. Scale bars, 10  $\mu$ m. **d** Representative images of Tet-  
 161 TauRD-Y\* cells treated for 24 h with doxycycline (Dox; 50 ng/mL) alone or in combination  
 162 with MLN7243 (MLN; 0.5  $\mu$ M) or Epoxomicin (Epox; 50 nM). Scale bar, 10  $\mu$ m. **e** Analysis of  
 163 TauRD-Y levels in Tet-TauRD-Y cells treated for 24 h with Dox, MLN7243 and Epoxomicin as  
 164 in (d). GAPDH served as loading control.

165

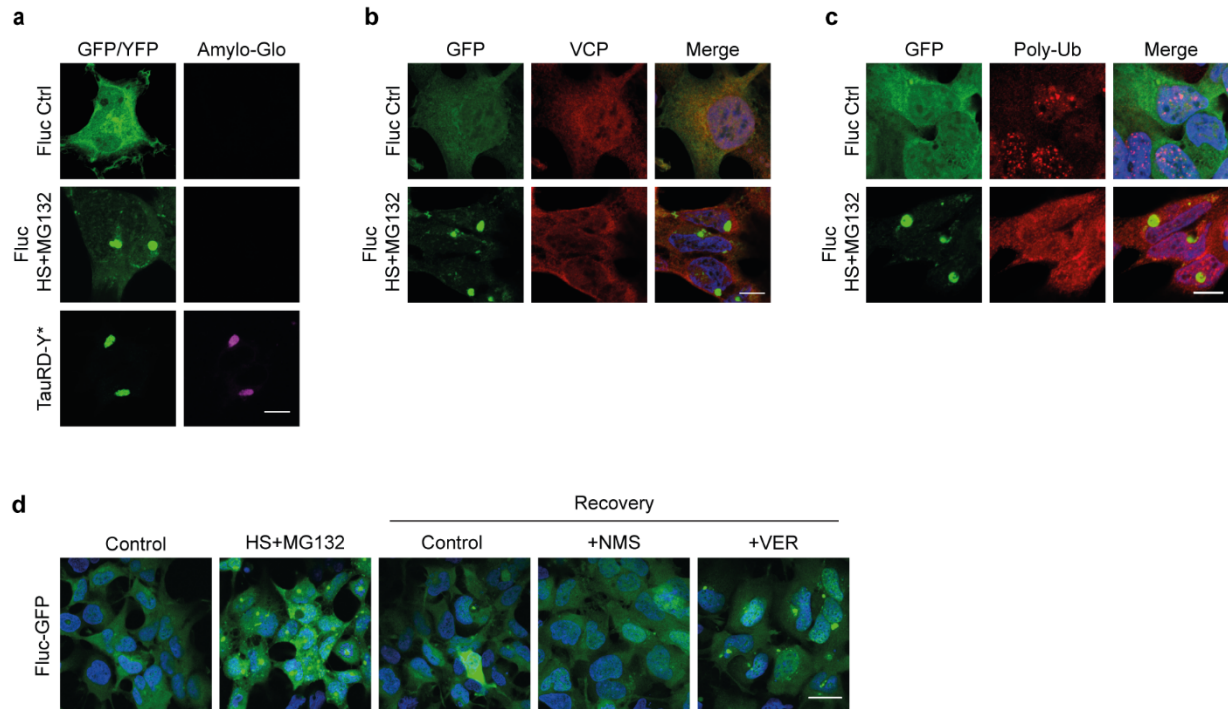

166

167 **Supplementary Fig. 7: Effect of VCP inhibition on firefly luciferase (Fluc) disaggregation.**  
 168 **a** Fluc-GFP expressing cells maintained at 37 °C (Fluc Ctrl) or heat-stressed at 43 °C in presence  
 169 of 5 μM MG132 for 2 h (Fluc HS) were stained with the amyloid-specific dye Amylo-Glo  
 170 (magenta). TauRD-Y\* cells were used as control. Amylo-Glo fluorescence was imaged with  
 171 similar exposure settings in all panels. Scale bar, 10 μm. **b** Immunofluorescence staining of VCP  
 172 (red), and **c** ubiquitylated proteins (FK2 antibody) (red) in Fluc-GFP cells treated as in (a). Scale  
 173 bars, 10 μm. **d** Effect of VCP and Hsp70 inhibition on Fluc-GFP disaggregation. Fluc-GFP  
 174 aggregation was induced as in (a). Cells were then shifted to MG132 free media and allowed to  
 175 recover at 37 °C for 8 h in presence of NMS-873 (NMS; 2.5 μM) and VER-155008 (VER; 10  
 176 μM) where indicated. Scale bar, 30 μm.

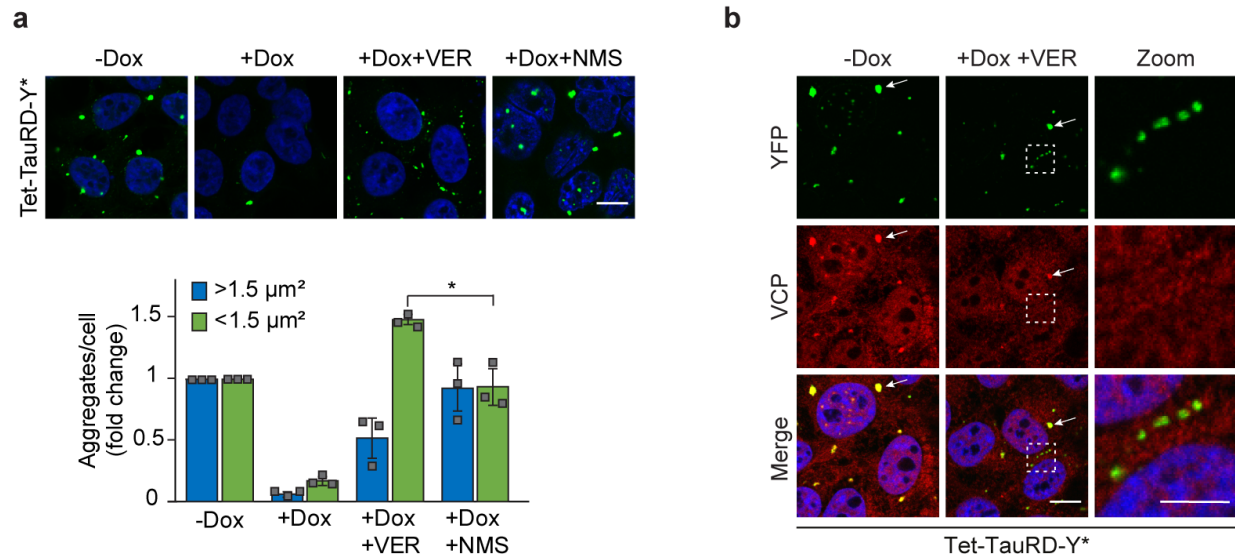

177

178 **Supplementary Fig. 8: Role of Hsp70 in TauRD-Y disaggregation.**

179 **a** Top, Representative images of Tet-TauRD-Y\* cells treated for 24 h with doxycycline (Dox; 50  
 180 ng/mL) alone or in combination with VER-155008 (VER; 10  $\mu\text{M}$ ) or NMS-873 (NMS; 2.5  $\mu\text{M}$ ).  
 181 Bottom, quantification of large (>1.5  $\mu\text{m}^2$ ) and small (<1.5  $\mu\text{m}^2$ ) TauRD-Y foci. Mean  $\pm$  s.d.;  
 182 n=3; ~100-200 cells were analyzed per experiment. \*p<0.05 (p=0.0435) from two-tailed  
 183 Student's paired t-test. Scale bar, 10  $\mu\text{m}$ . **b** Immunofluorescence staining of VCP (red) and YFP  
 184 fluorescence of TauRD-Y (green) in Tet-TauRD-Y\* cells treated with a combination of  
 185 doxycycline (Dox) and VER-155008 (VER) where indicated. White arrow points to large  
 186 TauRD-Y inclusions co-localizing with VCP. Dashed lines enclose TauRD-Y foci that do not co-  
 187 localize with VCP. Scale bar, 10  $\mu\text{m}$ . Scale bar zoom, 5  $\mu\text{m}$ .

188

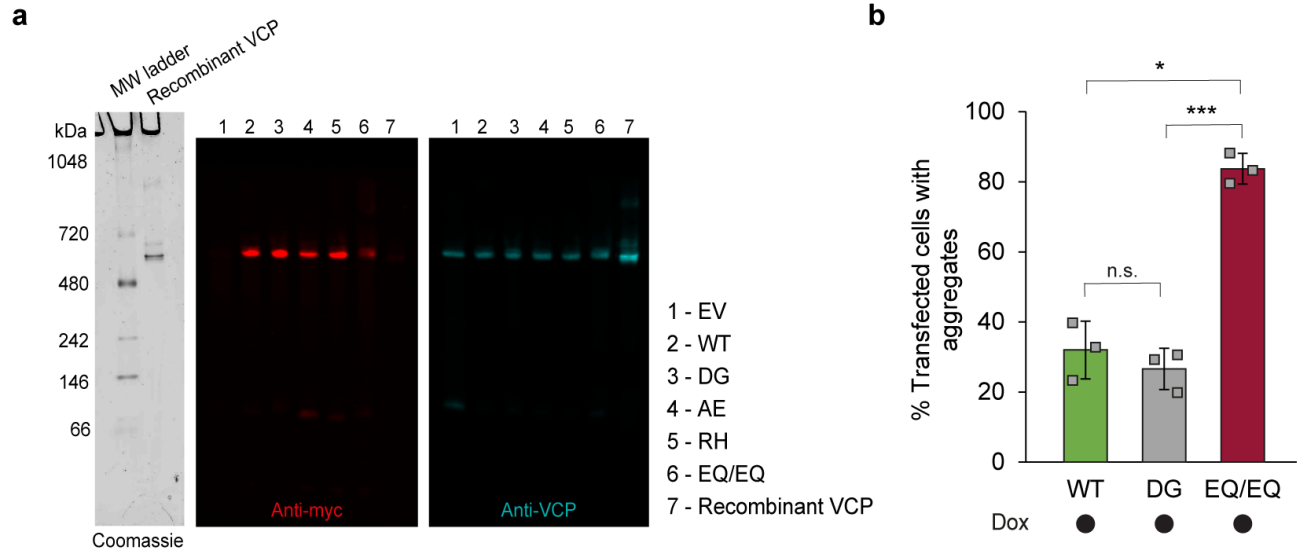

189

190 **Supplementary Fig. 9: Effect of VCP mutants on Tau disaggregation.**

191 **a** Native-PAGE analysis of recombinant VCP and lysates from Tet-TauRD-Y\* cells transfected  
 192 with empty vector (EV) and myc-tagged wild type (WT), D395G (DG), A232E (AE), R155H  
 193 (RH) and E305Q/E578Q (EQ/EQ) VCP constructs. Immunoblot probed against myc (red) and  
 194 VCP (cyan) is shown. Non-tagged, recombinant VCP was analyzed as control. **b** Quantification  
 195 of aggregate foci in myc-positive Tet-TauRD-Y\* cells transfected with myc-tagged WT, DG and  
 196 EQ/EQ VCP constructs for 24 h, and treated for another 24 h with doxycycline (Dox; 50 ng/mL).  
 197 Mean  $\pm$  s.d.; n=3; > 100 cells analyzed per experiment; \*p<0.05 (WT vs EQ/EQ p=0.0192);  
 198 \*\*\*p<0.001 (DG vs EQ/EQ p=0.0008); n.s. non-significant (p=0.5646).

199

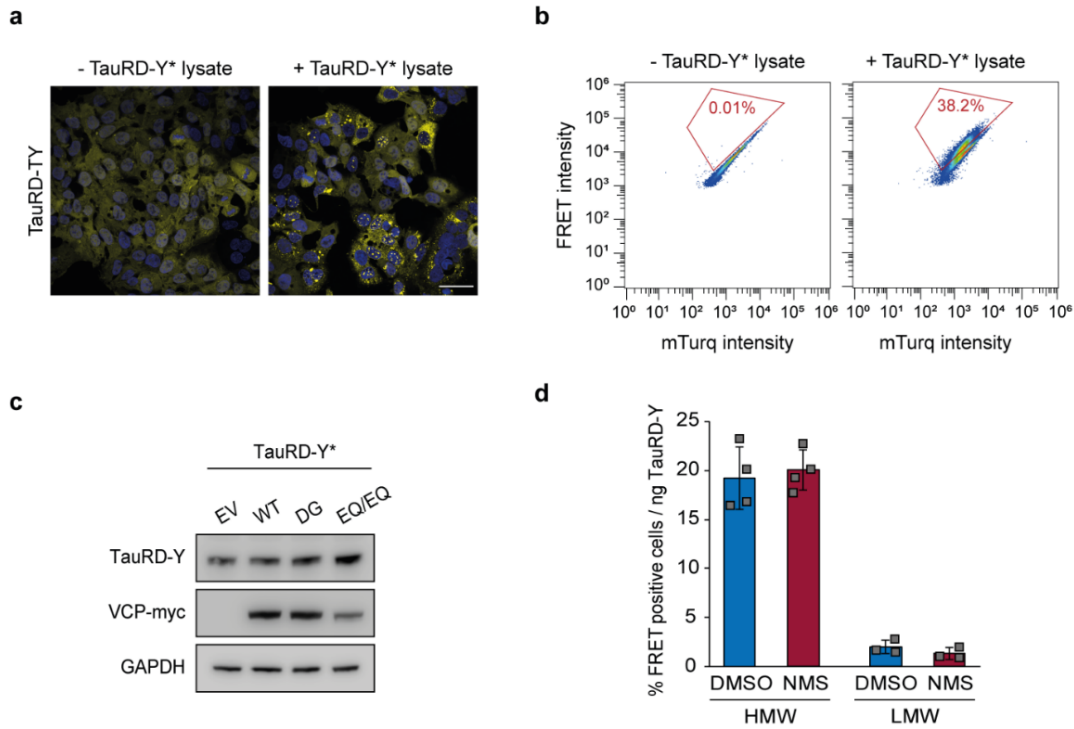

200

201 **Supplementary Fig. 10: Analysis of seeding-competent TauRD-Y.**

202 **a** Representative images of TauRD-TY FRET reporter cells treated with TauRD-Y\* lysate where  
 203 indicated showing TauRD-Y florescence in yellow. Scale bar, 40  $\mu$ m. **b** Representative  
 204 pseudocolour dot plots for the analysis of FRET positive TauRD-TY cells by flow cytometry  
 205 upon addition of TauRD-Y\* lysate. FRET intensity is plotted against mTurquoise2 (mTurq)  
 206 intensity and the % of FRET positive cells are indicated in red gates. **c** Analysis of TauRD-Y and  
 207 VCP-myc levels in TauRD-Y\* cells transfected for two days with empty vector (EV) and myc-  
 208 tagged wild type (WT), D395G (DG) and E305Q/E578Q (EQ/EQ) VCP constructs. TauRD-Y  
 209 and overexpressed VCP levels were determined by immunoblotting against GFP and myc,  
 210 respectively. GAPDH served as loading control. **d** Comparison of seeding efficiencies of high  
 211 molecular weight (HMW) and low molecular weight (LMW) species obtained by size exclusion  
 212 chromatography of lysates from TauRD-Y\* cells treated for 24 h with DMSO or NMS-873  
 213 (NMS; 2  $\mu$ M). Mean  $\pm$  s.d.; HMW n=4, LMW n=3.

**Supplementary Table 1: TauRD-Y interactome in TauRD-Y\* cells**

List of proteins interacting with TauRD-Y in TauRD-Y\* cells at steady state determined by stable isotope labelling by amino acids in cell culture (SILAC). TauRD-Y cells were used as control. Normalized SILAC ratios of TauRD-Y\*/TauRD-Y [H/L] from 3 independent replicates are shown. Interactors were defined as proteins quantified in at least 2 out of 3 replicates with enrichment  $\geq 2$  fold. Proteins with known association to the ubiquitin-proteasome system are highlighted in green and VCP-cofactor complex in red. Intensity-based absolute quantification (iBAQ) values reflect measured molar protein amounts.

| Protein ID    | Protein name                                         | Gene name      | Fasta headers                                              | Unique peptides | Mol. weight [kDa] | Norm. ratio [H/L] Rep.1 | Norm. ratio [H/L] Rep.2 | Norm. ratio [H/L] Rep.3 | Median norm. ratio | iBAQ [H] Exp.1 | iBAQ [H] Exp.2 | iBAQ [H] Exp.3 |
|---------------|------------------------------------------------------|----------------|------------------------------------------------------------|-----------------|-------------------|-------------------------|-------------------------|-------------------------|--------------------|----------------|----------------|----------------|
| Q9UNZ2;F2Z2K  | NSFL1 cofactor p47                                   | NSFL1C         | sp Q9UNZ2 NSF1C_HUMAN NSFL1 cofactor p47 OS=Homo sapi      | 14              | 40,572            | 42,702                  | 80,022                  | 11,719                  | 42,702             | 59143000       | 112180000      | 13783000       |
| Q9UQN3;A0A0I  | Charged multivesicular body protein 21               | CHMP2B         | sp Q9UQN3 CHM2B_HUMAN Charged multivesicular body pro      | 4               | 23,906            | 18,201                  | 25,514                  | 11,839                  | 18,201             | 2093000        | 5417800        | 15472000       |
| P55072;C9IZA5 | Transitional endoplasmic reticulum ATPase            | VCP            | sp P55072 TERA_HUMAN Transitional endoplasmic reticulum    | 47              | 89,321            | 16,959                  | 43,344                  | 6,3181                  | 16,959             | 29193000       | 94165000       | 26411000       |
| Q9UNM6;J3KNI  | 26S proteasome non-ATPase regulatory subunit 1       | PSMD13         | sp Q9UNM6 PSD13_HUMAN 26S proteasome non-ATPase regu       | 22              | 42,945            | 17,963                  | 16,071                  | 13,583                  | 16,071             | 9313200        | 17290000       | 50857000       |
| Q6PEV8        | Protein FAM199X                                      | FAM199X        | sp Q6PEV8 F199X_HUMAN Protein FAM199X OS=Homo sapien       | 5               | 42,801            | 41,449                  | 15,154                  | 15,115                  | 15,154             | 9838300        | 30031000       | 10267000       |
| F8VUA2;Q9HD4  | Charged multivesicular body protein 1c               | CHMP1A         | tr F8VUA2 F8VUA2_HUMAN Charged multivesicular body prot    | 5               | 19,531            | 14,648                  | 19,186                  | 12,293                  | 14,648             | 25912000       | 113020000      | 38592000       |
| Q15773;F5H0Y  | Myeloid leukemia factor 2                            | MLF2           | sp Q15773 MLF2_HUMAN Myeloid leukemia factor 2 OS=Hom      | 6               | 28,147            | 16,867                  | 13,819                  | 6,564                   | 13,819             | 74907000       | 153440000      | 42871000       |
| Q43242;H0YGV  | 26S proteasome non-ATPase regulatory subunit 3       | PSMD3          | sp Q43242 PSMD3_HUMAN 26S proteasome non-ATPase regul      | 34              | 60,977            | 13,413                  | 15,879                  | 6,9978                  | 13,413             | 21734000       | 50167000       | 10257000       |
| O00231;J3QRV  | 26S proteasome non-ATPase regulatory subunit 11      | PSMD11         | sp O00231 PSMD11_HUMAN 26S proteasome non-ATPase regul     | 26              | 47,463            | 13,086                  | 22,385                  | 7,5615                  | 13,086             | 14133000       | 35102000       | 7362100        |
| P62191;G3V4X  | 26S protease regulatory subunit 4                    | PSMC1          | sp P62191 PRS4_HUMAN 26S proteasome regulatory subunit     | 20              | 49,184            | 12,739                  | 13,685                  | 6,7346                  | 12,739             | 6082800        | 18968000       | 4723500        |
| P17480        | Nucleolar transcription factor 1                     | UBTF           | sp P17480 UBF1_HUMAN Nucleolar transcription factor 1 OS=  | 22              | 89,405            | 12,209                  | 11,585                  | 7,1602                  | 11,585             | 94071000       | 144030000      | 43389000       |
| O14545;F8VNX  | TRAF-type zinc finger domain-containing protein 1    | TRAFD1         | sp O14545 TRAD1_HUMAN TRAF-type zinc finger domain-cont    | 12              | 64,84             | 7,2319                  | 19,2                    | 11,522                  | 11,522             | 6914300        | 16022000       | 16301000       |
| Q13501;E7EMC  | Sequestosome-1                                       | SQSTM1         | sp Q13501 SQSTM_HUMAN Sequestosome-1 OS=Homo sapien        | 16              | 47,687            | 9,6152                  | 17,975                  | 11,41                   | 11,41              | 27933000       | 113830000      | 115270000      |
| Q13200;C9JPC  | 26S proteasome non-ATPase regulatory subunit 2       | PSMD2          | sp Q13200 PSMD2_HUMAN 26S proteasome non-ATPase regul      | 46              | 100,2             | 7,2067                  | 22,927                  | 11,267                  | 11,267             | 4555900        | 9942100        | 6380700        |
| H0Y6K2;A0A14  | Bromodomain-containing protein 2                     | BRD2           | tr H0Y6K2 H0Y6K2_HUMAN Bromodomain-containing protei       | 11              | 88,288            | 24,922                  | 7,6855                  | 10,958                  | 10,958             | 16169000       | 16169000       | 6613700        |
| H0YFD6;P4093  | Trifunctional enzyme subunit alpha, mitochondrial    | HADHA          | tr H0YFD6 H0YFD6_HUMAN Trifunctional enzyme subunit alp    | 29              | 86,371            | 10,902                  | 11,422                  | 8,175                   | 10,902             | 45516000       | 92103000       | 31426000       |
| P55036;Q5VWV  | 26S proteasome non-ATPase regulatory subunit 4       | PSMD4          | sp P55036 PSMD4_HUMAN 26S proteasome non-ATPase regul      | 14              | 40,736            | 12,228                  | 10,9                    | 3,7986                  | 10,9               | 19080000       | 82099000       | 8516700        |
| Q6QNY1;J3QRU  | Biogenesis of lysosome-related organelle complex 152 | BLOC1S2        | sp Q6QNY1 BL1S2_HUMAN Biogenesis of lysosome-related org   | 3               | 15,961            | 10,78                   | 15,848                  | 2,0051                  | 10,78              | 1892700        | 3652000        | 1718300        |
| P55084;F5GZQ  | Trifunctional enzyme subunit beta, mitochondrial     | HADHB          | sp P55084 ECHB_HUMAN Trifunctional enzyme subunit beta, m  | 25              | 51,294            | 9,9693                  | 11,079                  | 8,0079                  | 9,9693             | 65103000       | 128900000      | 39724000       |
| P25788;G3V4X  | Proteasome subunit alpha type-3                      | PSMA3          | sp P25788 PSA3_HUMAN Proteasome subunit alpha type-3 OS    | 9               | 28,433            | 3,0605                  | 14,754                  | 9,9671                  | 9,9671             | 2846500        | 1743900        | 2866700        |
| A8MUA9;A8MU   | Small ubiquitin-related modifier 4, SUMO3/4-specific | SUMO4          | tr A8MUA9 A8MUA9_HUMAN SMT3 suppressor of mif two 3 hc     | 1               | 15,317            | 8,4377                  | 11,126                  | 9,78185                 | 14432000           | 26087000       | 0              | 0              |
| Q8TAT6;J3L4U9 | Nuclear protein localization protein 4               | NPLC4          | tr Q8TAT6 NPL4_HUMAN Nuclear protein localization protein  | 17              | 68,119            | 3,9291                  | 15,451                  | 9,69005                 | 1208400            | 5604000        | 0              | 0              |
| P25789;H0YM2  | Proteasome subunit alpha type-4                      | PSMA4          | sp P25789 PSA4_HUMAN Proteasome subunit alpha type-4 OS    | 10              | 29,483            | 2,7706                  | 0                       | 16,307                  | 9,5388             | 4339400        | 0              | 4387000        |
| Q9UHD9        | Ubiquilin-2                                          | UBQLN2         | sp Q9UHD9 UBQL2_HUMAN Ubiquilin-2 OS=Homo sapiens OX       | 11              | 65,695            | 6,6843                  | 11,794                  | 9,23915                 | 8201000            | 24600000       | 108990         | 108990         |
| Q14818;H0Y58  | Proteasome subunit alpha type-7                      | PSMA7          | sp Q14818 PSA7_HUMAN Proteasome subunit alpha type-7 O     | 14              | 27,887            | 2,6045                  | 9,1585                  | 10,57                   | 9,1585             | 3845500        | 10551000       | 10021000       |
| Q9UID3;E9PJ3  | Vacuolar protein sorting-associated protein 55       | VPS51          | sp Q9UID3 VPS51_HUMAN Vacuolar protein sorting-associated  | 11              | 86,041            | 12,8                    | 5,2875                  | 9,04375                 | 603160             | 3513600        | 552200         | 552200         |
| Q14596;B7Z5R  | Next to BRCA1 gene 1 protein                         | NBR1           | sp Q14596 NBR1_HUMAN Next to BRCA1 gene 1 protein OS=H     | 12              | 107,41            | 15,113                  | 0                       | 2,4528                  | 8,7829             | 0              | 12693000       | 12934000       |
| Q92890;C9JNP  | Ubiquitin fusion degradation protein 1               | UFD1L          | sp Q92890 UFD1_HUMAN Ubiquitin recognition factor in ER-a  | 9               | 34,5              | 11,411                  | 6,134                   | 8,7725                  | 7855900            | 5835400        | 7211700        | 7211700        |
| Q15008;C9J0E  | 26S proteasome non-ATPase regulatory subunit 6       | PSMD6          | sp Q15008 PSMD6_HUMAN 26S proteasome non-ATPase regul      | 27              | 45,531            | 7,3639                  | 9,6008                  | 8,555                   | 8,555              | 13494000       | 32338000       | 6986900        |
| Q96DX7        | Tripartite motif-containing protein 44               | TRIM44         | sp Q96DX7 TRI44_HUMAN Tripartite motif-containing protein  | 5               | 38,472            | 10,369                  | 6,5983                  | 8,48365                 | 708170             | 19187000       | 783500         | 783500         |
| Q16643;D6R9V  | Drebrin                                              | DBN1           | sp Q16643 DREB_HUMAN Drebrin OS=Homo sapiens OX=9606       | 16              | 71,428            | 13,93                   | 0                       | 2,7427                  | 8,33635            | 123350         | 13631000       | 6342500        |
| A0A087X21;P6  | 26S protease regulatory subunit 10B                  | PSMC6          | tr A0A087X21 A0A087X21_HUMAN 26S proteasome regulati       | 16              | 45,796            | 10,533                  | 6,0398                  | 8,2864                  | 2266900            | 10434000       | 743130         | 743130         |
| P51665;H3BNT  | 26S proteasome non-ATPase regulatory subunit 7       | PSMD7          | sp P51665 PSMD7_HUMAN 26S proteasome non-ATPase regul      | 14              | 37,025            | 8,2466                  | 13,713                  | 6,6956                  | 8,2466             | 9133800        | 34517000       | 6064400        |
| P35998;A0A1W  | 26S protease regulatory subunit 7                    | PSMC2          | sp P35998 PRS7_HUMAN 26S proteasome regulatory subunit     | 24              | 48,633            | 7,5017                  | 8,0742                  | 8,5178                  | 8,0742             | 8531200        | 12549000       | 5021100        |
| B3KVL5;Q8TBK  | Zinc finger CCHC domain-containing protein 1         | ZCCHC10        | tr B3KVL5 B3KVL5_HUMAN Zinc finger, CCHC domain containi   | 1               | 20,308            | 0                       | 7,1775                  | 8,4956                  | 7,83655            | 18527000       | 60508000       | 11466000       |
| Q8IXW5        | Putative RNA polymerase II subunit B1                | RPAP2          | sp Q8IXW5 RPAP2_HUMAN Putative RNA polymerase II subuni    | 13              | 69,508            | 10,475                  | 7,8181                  | 3,3996                  | 7,8181             | 1205400        | 8566200        | 4524400        |
| P62979;J3Q53  | Ubiquitin-40S ribosomal protein S27a                 | RPS27A;UBB;UBC | sp P62979 RS27A_HUMAN Ubiquitin-40S ribosomal protein S    | 10              | 17,965            | 9,4683                  | 7,6945                  | 4,1911                  | 7,6945             | 3164100000     | 7019100000     | 1951400000     |
| Q99460;A0A08  | 26S proteasome non-ATPase regulatory subunit 10      | PSMD10         | sp Q99460 PSMD10_HUMAN 26S proteasome non-ATPase regul     | 42              | 105,84            | 6,684                   | 7,415                   | 7,8358                  | 7,415              | 3058500        | 12531000       | 2851500        |
| P43686        | 26S protease regulatory subunit 6B                   | PSMC4          | sp P43686 PRS6B_HUMAN 26S proteasome regulatory subuni     | 21              | 47,366            | 8,4576                  | 2,5541                  | 6,7907                  | 6,7907             | 1137200        | 10458000       | 617140         |
| R4GMR5;K7EJR  | 26S proteasome non-ATPase regulatory subunit 8       | PSMD8          | tr R4GMR5 R4GMR5_HUMAN 26S proteasome non-ATPase reg       | 10              | 32,551            | 1,3779                  | 6,6145                  | 13,37                   | 6,6145             | 491820         | 3751000        | 6211100        |
| POCAP2;H8V6P  | DNA-directed RNA polymerase II subunit 1             | POLR2M;GCOM1   | sp POCAP2 GRL1A_HUMAN DNA-directed RNA polymerase II su    | 4               | 41,739            | 6,9552                  | 6,1579                  | 6,55655                 | 2999600            | 6478700        | 0              | 0              |
| P49721;A0A08  | Proteasome subunit beta type-2                       | PSMB2          | sp P49721 PSB2_HUMAN Proteasome subunit beta type-2 OS=    | 10              | 22,836            | 2,6138                  | 10,075                  | 6,3444                  | 526870             | 3115400        | 1949400        | 1949400        |
| Q9UQ35;I3L4D  | Serine/arginine repetitive matrix protein 2          | SRRM2          | sp Q9UQ35 SRRM2_HUMAN Serine/arginine repetitive matrix    | 44              | 299,61            | 8,8182                  | 4,1061                  | 6,3418                  | 6,3418             | 40059000       | 69443000       | 34477000       |
| O75487        | Glypican-4; Secreted glypican-4                      | GPC4           | sp O75487 GPC4_HUMAN Glypican-4 OS=Homo sapiens OX=91      | 13              | 62,411            | 6,1176                  | 9,697                   | 5,2264                  | 6,1176             | 12306000       | 31449000       | 4359700        |
| Q9H307;G3V5F  | Pinin                                                | PNN            | sp Q9H307 PININ_HUMAN Pinin OS=Homo sapiens OX=9606 C      | 39              | 81,627            | 6,4613                  | 5,9829                  | 3,8631                  | 5,9829             | 180190000      | 359840000      | 205880000      |
| Q99615;K7ESP  | DnaJ homolog subfamily C member 7                    | DNJC7          | sp Q99615 DNJC7_HUMAN DnaJ homolog subfamily C membe       | 35              | 56,44             | 32,017                  | 5,9433                  | 3,8506                  | 5,9433             | 58381000       | 56886000       | 13723000       |
| Q95816        | BAG family molecular chaperone regulator 2           | BAG2           | sp Q95816 BAG2_HUMAN BAG family molecular chaperone re     | 9               | 23,772            | 5,7371                  | 8,5666                  | 3,8905                  | 5,7371             | 10758000       | 36658000       | 8833600        |
| Q9BYN8        | 28S ribosomal protein S26, mitochondrial             | MRPS26         | sp Q9BYN8 RT26_HUMAN 28S ribosomal protein S26, mitoch     | 7               | 24,211            | 5,6963                  | 5,8954                  | 3,1697                  | 5,6963             | 15879000       | 55778000       | 11868000       |
| P10644;K7EPB  | cAMP-dependent protein kinase type I- $\beta$        | PRKAR1A        | sp P10644 KAP0_HUMAN cAMP-dependent protein kinase typ     | 12              | 42,981            | 5,6698                  | 8,1797                  | 2,4289                  | 5,6698             | 1804900        | 8873600        | 3456600        |
| A0A0C4DG62;F  | ADP-ribosylation factor-like protein 6-1             | ARL6IP4        | tr A0A0C4DG62 A0A0C4DG62_HUMAN ADP-ribosylation fact       | 5               | 24,591            | 5,6534                  | 5,8168                  | 2,4357                  | 5,6534             | 11791000       | 37307000       | 7853000        |
| Q15545        | Transcription initiation factor TFIID subunit 7      | TFIID7         | sp Q15545 TAF7_HUMAN Transcription initiation factor TFIID | 5               | 40,259            | 6,7383                  | 4,5475                  | 6,5429                  | 1917000            | 3824800        | 2625900        | 2625900        |
| F5H442;Q9981  | Tumor susceptibility gene 101 protein                | TSG101         | tr F5H442 F5H442_HUMAN Tumor susceptibility gene 101 pr    | 8               | 40,917            | 6,9756                  | 3,423                   | 5,1993                  | 1298100            | 2512100        | 0              | 0              |

|                                                       |                |                                                             |     |        |        |        |         |         |            |            |            |
|-------------------------------------------------------|----------------|-------------------------------------------------------------|-----|--------|--------|--------|---------|---------|------------|------------|------------|
| Q14677;H0YD5 Clathrin interactor 1                    | CLINT1         | sp Q14677 EPN4_HUMAN Clathrin interactor 1 OS=Homo sapi     | 17  | 68,259 | 4,5671 | 5,1051 |         | 4,8361  | 483270     | 1390800    | 0          |
| Q16531;F5GY5 DNA damage-binding protein 1             | DDB1           | sp Q16531 DDB1_HUMAN DNA damage-binding protein 1 OS=       | 51  | 126,97 | 5,1552 | 4,8124 | 4,7395  | 4,8124  | 2260500    | 2015000    | 818320     |
| Q14646;H0Y8V Chromodomain-helicase-DNA-binding        | CHD1           | sp Q14646 CHD1_HUMAN Chromodomain-helicase-DNA-bind         | 22  | 196,69 | 4,667  | 5,6909 | 3,5182  | 4,667   | 1212300    | 6836700    | 855680     |
| G3V5Z7;P6090 Proteasome subunit alpha type;Protea     | PSMA6          | tr G3V5Z7 G3V5Z7_HUMAN Proteasome subunit alpha type O      | 12  | 28,147 |        | 5,4361 | 3,7845  | 4,6103  | 0          | 986560     | 3211200    |
| P17980;E9PM6 26S protease regulatory subunit 6A       | PSMC3          | sp P17980 PRS56A_HUMAN 26S proteasome regulatory subuni     | 21  | 49,203 | 5,2382 | 3,8803 |         | 4,55925 | 2297800    | 7983700    | 563940     |
| O00232;J3KTJ5 26S proteasome non-ATPase regulatory    | PSMD12         | sp O00232 PSD12_HUMAN 26S proteasome non-ATPase regul       | 22  | 52,904 | 4,4642 | 2,2919 | 13,215  | 4,4642  | 5157500    | 5534500    | 3641700    |
| P61964;V9GZ5 WD repeat-containing protein 5           | WDR5           | sp P61964 WDR5_HUMAN WD repeat-containing protein 5 O       | 5   | 36,577 | 2,7665 | 5,5202 |         | 4,14335 | 1116200    | 6218500    | 163100     |
| O00487;C9JW3 26S proteasome non-ATPase regulatory     | PSMD14         | sp O00487 PSDE_HUMAN 26S proteasome non-ATPase regulat      | 10  | 34,588 | 4,4008 | 3,6454 |         | 4,0231  | 2763600    | 4175800    | 1273000    |
| P62195;J3QQV 26S protease regulatory subunit 8        | PSMC5          | sp P62195 PRS8_HUMAN 26S proteasome regulatory subunit      | 23  | 45,626 | 4,5333 | 4,0178 | 2,4837  | 4,0178  | 2401900    | 10162000   | 3258800    |
| P24928 DNA-directed RNA polymerase II subunit         | POLR2A         | sp P24928 RPB1_HUMAN DNA-directed RNA polymerase II sub     | 51  | 217,17 | 3,9675 | 4,1625 | 3,3865  | 3,9675  | 5036400    | 22719000   | 4400000    |
| O14974;F8VZN Protein phosphatase 1 regulatory subu    | PPP1R12A       | sp O14974 MYP1T_HUMAN Protein phosphatase 1 regulatory      | 15  | 115,28 | 3,6323 | 4,1458 |         | 3,88905 | 135210     | 738040     | 0          |
| Q5VIR6;F6VX9 Vacuolar protein sorting-associated prc  | VPS53          | sp Q5VIR6 VPS53_HUMAN Vacuolar protein sorting-associatec   | 10  | 79,652 |        | 2,3872 | 5,2434  | 3,8153  | 0          | 867750     | 158630     |
| Q8WV44;H0Y9' E3 ubiquitin-protein ligase TRIM41       | TRIM41         | sp Q8WV44 TRI41_HUMAN E3 ubiquitin-protein ligase TRIM4:    | 5   | 71,669 | 4,3208 | 3,4885 | 3,7734  | 3,7734  | 613000     | 252640     | 1261800    |
| F8W118;F8VV59;B7Z9C2;F8VRJ2                           | NAP1L1         | tr F8W118 F8W118_HUMAN Nucleosome assembly protein 1-       | 12  | 24,694 | 3,6447 | 4,8952 | 3,4073  | 3,6447  | 4807500    | 20158000   | 2227100    |
| E9PNW4;A0A21 CD59 glycoprotein                        | CD59           | tr E9PNW4 E9PNW4_HUMAN Uncharacterized protein OS=Ho        | 4   | 11,985 |        | 4,7462 | 2,1357  | 3,44095 | 5131200    | 54954000   | 35045000   |
| Q96BQ5 Coiled-coil domain-containing protein          | CCDC127        | sp Q96BQ5 CC127_HUMAN Coiled-coil domain-containing pri     | 4   | 30,834 | 4,0401 |        | 2,7807  | 3,4104  | 3768100    | 3178900    | 697410     |
| O43164 E3 ubiquitin-protein ligase Praja-2            | PJA2           | sp O43164 PJA2_HUMAN E3 ubiquitin-protein ligase Praja-2 C  | 15  | 78,213 | 3,3397 | 6,1296 | 2,2392  | 3,3397  | 4791500    | 29710000   | 8235700    |
| B8ZZD4;Q86VP Tax1-binding protein 1                   | TAX1BP1        | tr B8ZZD4 B8ZZD4_HUMAN Tax1-binding protein 1 OS=Homo       | 14  | 93,609 | 9,5213 | 3,2831 | 3,1608  | 3,2831  | 409770     | 4896800    | 4112000    |
| P62857 40S ribosomal protein S28                      | RPS28          | sp P62857 RS28_HUMAN 40S ribosomal protein S28 OS=Hom       | 2   | 7,8409 | 3,7217 | 3,2677 | 1,1842  | 3,2677  | 18987000   | 32783000   | 6557100    |
| P62873;F6UT2 Guanine nucleotide-binding protein G(    | GNB1           | sp P62873 GBB1_HUMAN Guanine nucleotide-binding protei      | 13  | 37,377 | 3,2364 | 4,2746 | 1,6165  | 3,2364  | 2812200    | 17175000   | 35389000   |
| Q7L7X3;J3Q57 Serine/threonine-protein kinase TAO1     | TAOK1          | sp Q7L7X3 TAOK1_HUMAN Serine/threonine-protein kinase T     | 15  | 116,07 | 1,3856 | 3,2072 | 3,0804  | 3,0804  | 2889600    | 6633200    | 6110200    |
| O75955;A0A14 Flotillin-1                              | FLOT1          | sp O75955 FLOT1_HUMAN Flotillin-1 OS=Homo sapiens OX=9      | 16  | 47,355 | 3,0802 | 3,6951 | 1,7534  | 3,0802  | 11366000   | 21730000   | 4780700    |
| Q12899;A2AE4 Tripartite motif-containing protein 26   | TRIM26         | sp Q12899 TRI26_HUMAN Tripartite motif-containing protein   | 7   | 62,165 | 4,126  |        | 2,001   | 3,0635  | 1519900    | 2525100    | 1427900    |
| Q99986;H0YJ5 Serine/threonine-protein kinase VRK1     | VRK1           | tr Q99986 VRK1_HUMAN Serine/threonine-protein kinase VRI    | 14  | 45,476 | 3,4612 | 3,0568 | 1,1048  | 3,0568  | 2738700    | 26700000   | 18471000   |
| C9J2Y9;P3087 DNA-directed RNA polymerase;DNA-dir      | POLR2B         | tr C9J2Y9 C9J2Y9_HUMAN DNA-directed RNA polymerase sub      | 34  | 133,06 | 3,7497 | 3,0177 | 3,0513  | 3,0513  | 4282800    | 9848300    | 392790     |
| H3BV80;H3BMI RNA-binding protein with serine-rich d   | RNP51          | tr H3BV80 H3BV80_HUMAN RNA-binding protein with serine-     | 6   | 24,561 | 3,0441 | 3,3076 | 2,5543  | 3,0441  | 139510000  | 204410000  | 94293000   |
| Q9UBI6 Guanine nucleotide-binding protein G(          | GNG12          | sp Q9UBI6 GBG12_HUMAN Guanine nucleotide-binding prote      | 3   | 8,0061 | 3,0438 | 4,9367 | 2,0117  | 3,0438  | 3890300    | 34430000   | 84342000   |
| I1E4Y6;Q6Y7W PERK amino acid-rich with GYF domain     | GIGYF2         | tr I1E4Y6 I1E4Y6_HUMAN GRB10-interacting GYF protein 2 OS   | 11  | 152,53 | 3,4506 | 2,6293 | 3,03995 | 5,71610 | 1017200    |            | 0          |
| P16403;P1041 Histone H1.2;Histone H1.4                | HIST1H1C;HIST1 | sp P16403 H12_HUMAN Histone H1.2 OS=Homo sapiens OX=9       | 12  | 21,364 | 3,0264 | 2,2983 | 3,593   | 3,0264  | 103310000  | 303900000  | 129810000  |
| P19387;H3BRR DNA-directed RNA polymerase II subunit   | POLR2C         | sp P19387 RPB3_HUMAN DNA-directed RNA polymerase II sub     | 10  | 31,441 | 3,0233 | 3,8035 | 2,6379  | 3,0233  | 11207000   | 18173000   | 2879500    |
| Q5HYB6 Dkfz686j1372                                   |                | tr Q5HYB6 Q5HYB6_HUMAN Epididymis luminal protein 189 (     | 21  | 27,175 | 4,5555 | 2,9635 | 2,9779  | 2,9779  | 1471400    | 6297900    | 1443000    |
| P06748;E5RI98 Nucleophosmin                           | NPM1           | sp P06748 NPM_HUMAN Nucleophosmin OS=Homo sapiens O         | 17  | 32,575 | 3,5369 | 2,9192 | 1,7384  | 2,9192  | 45741000   | 124660000  | 102380000  |
| J3QLD9;E7EMK Flotillin-2                              | FLOT2          | tr J3QLD9 J3QLD9_HUMAN Flotillin-2 OS=Homo sapiens OX=9     | 15  | 47,142 | 2,9067 | 4,1686 | 1,6969  | 2,9067  | 8440000    | 26271000   | 11510000   |
| P62879;C9JIS1 Guanine nucleotide-binding protein G(   | GNB2           | sp P62879 GBB2_HUMAN Guanine nucleotide-binding protei      | 12  | 37,331 | 2,9058 | 4,836  | 1,5201  | 2,9058  | 4881400    | 14551000   | 15388000   |
| Q53H12;E9PC1 Acylglycerol kinase, mitochondrial       | AGK            | sp Q53H12 AGK_HUMAN Acylglycerol kinase, mitochondrial C    | 18  | 47,137 | 1,1258 | 2,8627 | 4,0535  | 2,8627  | 4820100    | 15152000   | 13972000   |
| Q13112 Chromatin assembly factor 1 subunit B          | CHAF1B         | sp Q13112 CAF1B_HUMAN Chromatin assembly factor 1 subu      | 4   | 61,492 | 2,844  | 2,8809 |         | 2,86245 | 512590     | 77757      | 0          |
| A0A087WVZ9;F DNA-directed RNA polymerases I, II, anc  | POLR2E         | tr A0A087WVZ9 A0A087WVZ9_HUMAN DNA-directed RNA po          | 7   | 21,459 | 3,1167 | 2,4935 |         | 2,8051  | 3322300    | 15849000   | 0          |
| Q92820 Gamma-glutamyl hydrolase                       | GGH            | sp Q92820 GGH_HUMAN Gamma-glutamyl hydrolase OS=Horr        | 8   | 35,964 | 2,8025 | 5,1253 | 2,0979  | 2,8025  | 2133200    | 7381800    | 1489700    |
| Q96GA3;A0A07 Protein LTV1 homolog                     | LTV1           | sp Q96GA3 LTV1_HUMAN Protein LTV1 homolog OS=Homo saj       | 15  | 54,854 | 1,3874 | 3,0356 | 2,7805  | 2,7805  | 11848000   | 15414000   | 11793000   |
| P60709;A0A2R Actin, cytoplasmic 1;Actin, cytoplasmii  | ACTB           | sp P60709 ACTB_HUMAN Actin, cytoplasmic 1 OS=Homo sapie     | 27  | 41,736 | 1,2178 | 3,5005 | 2,7751  | 2,7751  | 11323000   | 36019000   | 20782000   |
| Added01;CON_Q9U6Y5;I3L170                             |                | tr Added01 TauYfp_HUMAN Tau Yfp                             | 39  | 43,256 | 3,5063 | 2,7256 | 2,1606  | 2,7256  | 4130100000 | 8914000000 | 3833400000 |
| Q99613;B5ME1 Eukaryotic translation initiation factor | EIF3C;EIF3CL   | sp Q99613 EIF3C_HUMAN Eukaryotic translation initiation fac | 33  | 105,34 | 2,5577 | 2,8357 |         | 2,6967  | 855670     | 4670000    | 443520     |
| P28066 Proteasome subunit alpha type-5                | PSMA5          | sp P28066 PSA5_HUMAN Proteasome subunit alpha type-5 OS     | 13  | 26,411 |        | 3,108  | 2,254   | 2,681   | 713200     | 3627100    | 526200     |
| Q9HCM4 Band 4.1-like protein 5                        | EPB41L5        | sp Q9HCM4 E41L5_HUMAN Band 4.1-like protein 5 OS=Homo       | 9   | 81,855 | 2,1785 | 3,0182 |         | 2,59835 | 227100     | 3722200    | 0          |
| A0A087WYV5;> Slit homolog 2 protein;Slit homolog 2    | SLIT2          | tr A0A087WYV5 A0A087WYV5_HUMAN Slit homolog 2 protei        | 9   | 159,98 | 2,0219 | 3,1071 |         | 2,5645  | 487410     | 1400300    | 599630     |
| A0A1W2PQ90; DNA repair protein RAD50                  | RAD50          | tr A0A1W2PQ90 A0A1W2PQ90_HUMAN Uncharacterized pro          | 25  | 142,94 | 2,5131 | 3,214  | 0,89296 | 2,5131  | 1048700    | 5250600    | 1514700    |
| Q9H0U4;E9PLD Ras-related protein Rab-1B;Putative Ra   | RAB1B;RAB1C    | sp Q9H0U4 RAB1B_HUMAN Ras-related protein Rab-1B OS=Ho      | 12  | 22,171 | 2,7446 |        | 2,1603  | 2,45245 | 682330     | 3902100    | 564680     |
| Q13823;H0YG1 Nucleolar GTP-binding protein 2          | GNL2           | sp Q13823 NOG2_HUMAN Nucleolar GTP-binding protein 2 O      | 18  | 83,654 | 2,5228 | 2,3703 |         | 2,44655 | 504360     | 3938100    | 57885      |
| Q07021;I3L3Q; Complement component 1 Q subcomp        | C1QBP          | sp Q07021 C1QBP_HUMAN Complement component 1 Q subc         | 10  | 31,362 | 2,1285 | 5,1114 | 2,4395  | 2,4395  | 5133600    | 39902000   | 12700000   |
| Q72417 Nuclear fragile X mental retardation-int       | NUFIP2         | sp Q72417 NUFP2_HUMAN Nuclear fragile X mental retardatic   | 15  | 76,12  | 2,9962 | 2,4364 | 2,0328  | 2,4364  | 5829600    | 7837800    | 5467700    |
| P08670;BOYJC4 Vimentin                                | VIM            | sp P08670 VIME_HUMAN Vimentin OS=Homo sapiens OX=960        | 45  | 53,651 | 2,4027 | 2,6728 | 1,6894  | 2,4027  | 59024000   | 131930000  | 146780000  |
| P19525;C9JZT2 Interferon-induced, double-stranded R   | EIF2AK2        | sp P19525 E2AK2_HUMAN Interferon-induced, double-strand     | 12  | 62,094 | 2,5648 | 2,384  | 2,0421  | 2,384   | 145870     | 749090     | 114650     |
| Q01082 Spectrin beta chain, non-erythrocytic 1        | SPTBN1         | sp Q01082 SPTB2_HUMAN Spectrin beta chain, non-erythrocy    | 120 | 274,61 | 2,354  | 5,0002 | 1,5658  | 2,354   | 14363000   | 46226000   | 27935000   |
| A0A0D9SF54;A0A0D9SGF6;A0A0D9SFF6;A0A0D9SFH4;SPTAN1    |                | tr A0A0D9SF54 A0A0D9SF54_HUMAN Spectrin alpha chain, n      | 132 | 282,83 | 2,3502 | 5,0256 | 1,4746  | 2,3502  | 16833000   | 62862000   | 26440000   |
| P07948;E5RJ37 Tyrosine-protein kinase Lyn             | LYN            | sp P07948 LYN_HUMAN Tyrosine-protein kinase Lyn OS=Homc     | 12  | 58,573 |        | 2,3857 | 2,2951  | 2,3404  | 0          | 1032300    | 2217900    |
| Q9UN86;D6RAK Ras GTPase-activating protein-binding    | G3BP2          | sp Q9UN86 G3BP2_HUMAN Ras GTPase-activating protein-bin     | 11  | 54,12  | 2,3338 | 1,3159 | 2,5495  | 2,3338  | 8272900    | 13070000   | 6033900    |
| P07900;G3V2I;Heat shock protein HSP 90-alpha          | HSP90AA1       | sp P07900 HS90A_HUMAN Heat shock protein HSP 90-alpha C     | 63  | 84,659 |        | 4,0858 | 2,008   | 2,277   | 6729400    | 12647000   | 4596800    |
| P46013 Antigen Ki-67                                  | MKI67          | sp P46013 KI67_HUMAN Proliferation marker protein Ki-67 O   | 17  | 358,69 | 2,3191 | 2,2468 | 2,2169  | 2,2468  | 524560     | 475360     | 44507      |



|                                                             |                                                             |    |        |        |        |         |        |           |           |           |
|-------------------------------------------------------------|-------------------------------------------------------------|----|--------|--------|--------|---------|--------|-----------|-----------|-----------|
| P60228;E5RGA Eukaryotic translation initiation factor EIF3E | sp P60228 EIF3E_HUMAN Eukaryotic translation initiation fac | 25 | 52,22  | 2,3804 | 2,2127 | 1,9171  | 2,2127 | 1089300   | 1573400   | 1367200   |
| P49916;K7ERZ DNA ligase 3                                   | LIG3                                                        | 8  | 112,91 | 2,9178 | 2,203  | 2,1767  | 2,203  | 1532800   | 1039000   | 946440    |
| Q5RKY6 Exosome complex component MTR3                       | EXOSC6                                                      | 6  | 28,235 | 2,3573 | 2,1818 | 2,111   | 2,1818 | 11071000  | 15292000  | 4620400   |
| P12931 Proto-oncogene tyrosine-protein kinase SRC           | SRC                                                         | 8  | 59,834 | 2,168  | 4,1415 | 1,8886  | 2,168  | 748320    | 2601200   | 1702500   |
| P63092;Q5JWF Guanine nucleotide-binding protein G (GNAS     | GNAS2                                                       | 13 | 45,664 | 2,1627 | 4,1417 | 1,5402  | 2,1627 | 1488700   | 9048500   | 3740200   |
| O75531;E9PJJ8 Barrier-to-autointegration factor;Barrier     | BANF1                                                       | 6  | 10,058 | 2,1605 | 2,4895 | 1,4442  | 2,1605 | 167700000 | 464450000 | 175040000 |
| Q9Y265;E7ETRC RuvB-like 1                                   | RUVBL1                                                      | 24 | 50,227 | 1,8486 | 2,1597 | 2,5745  | 2,1597 | 2800700   | 6342500   | 382330    |
| O14578;H7BYJ Citron Rho-interacting kinase                  | CIT                                                         | 11 | 231,43 | 3,1776 | 2,1397 | 0,96079 | 2,1397 | 57864     | 292140    | 49921     |
| P27986;H0YBC Phosphatidylinositol 3-kinase regulator        | PIK3R1                                                      | 6  | 83,597 | 1,5657 | 2,1169 | 2,5085  | 2,1169 | 745890    | 1116000   | 1210500   |
| Q6WCQ1;J3KSV Myosin phosphatase Rho-interacting protein     | MPRIP                                                       | 12 | 116,53 | 2,1049 | 2,173  | 0,79734 | 2,1049 | 588250    | 1624600   | 104110    |
| P08754 Guanine nucleotide-binding protein G (GNAI3          | GNAI3                                                       | 15 | 40,532 | 2,0157 | 4,9059 | 2,0813  | 2,0813 | 19273000  | 75469000  | 42160000  |
| O15234;J3KSY7 Protein CASC3                                 | CASC3                                                       | 8  | 76,277 | 2,067  | 2,0138 | 2,7423  | 2,067  | 698630    | 2073400   | 4126900   |
| P17987;E7EQRI T-complex protein 1 subunit alpha             | TCP1                                                        | 34 | 60,343 | 1,5294 | 2,2873 | 2,0582  | 2,0582 | 485300    | 1703400   | 621710    |
| Q5SRQ6;P6787 Casein kinase II subunit beta                  | CSNK2B                                                      | 8  | 26,925 | 2,0436 | 2,4349 | 1,2233  | 2,0436 | 5899500   | 15187000  | 987590    |
| P08238;Q58FF Heat shock protein HSP 90-beta                 | HSP90AB1                                                    | 64 | 83,263 | 1,9891 | 2,9312 | 2,02    | 2,02   | 7615400   | 29148000  | 15600000  |
| O95425;A0A0J1 Supervillin                                   | SVIL                                                        | 9  | 247,74 | 1,4281 | 3,0818 | 2,0134  | 2,0134 | 360680    | 1636100   | 213390    |
| Q14676;A2AB0 Mediator of DNA damage checkpoint protein      | MDC1                                                        | 20 | 226,66 | 2,1653 | 2,0075 | 1,5305  | 2,0075 | 303620    | 152960    | 60101     |
| Q14008;H0YDX Cytoskeleton-associated protein 5              | CKAP5                                                       | 72 | 225,49 | 1,7242 | 2,0021 | 2,3599  | 2,0021 | 325010    | 2252600   | 1461800   |
